# Supplementary material for: Apical contacts stemming from incomplete delamination guide progenitor cell allocation through a dragging mechanism
Source: eLife. 2021 Aug 27;10:e66483. doi: 10.7554/eLife.66483 (PMC8460252; doi:10.7554/eLife.66483)
Supplement: Figure 1—source data 1. [file elife-66483-fig1-data1.xlsx]

## Sheet: Fig1G
Dorsal EVL position	Embryo 1	Embryo 2	Embryo 3		Descriptive Statistics		N Analysis	N Missing	Mean	Standard Deviation
Marginal	18	16	15			Marginal	3	0	16.3333	1.52753
Sub-marginal	14	9	10			Sub-marginal	3	0	11	2.64575
					Normality Test (Shapiro Wilk)		p-value	Decision at level(5%)
						Marginal	0.63689	Can't reject normality
						Sub-marginal	0.36311	Can't reject normality
					Paired t-test	t Statistic	DF	Prob>|t|
						6.04743	2	0.02627

## Sheet: Fig1H-I
DFCs				Dorsal EVL cells
Cell ID	Time (min)	Apical Area (mm2)		Cell ID	Time (min)	Apical Area (mm2)
1	0	683.312		1	0	887.115
1	34	326.801		1	34	897.056
1	68	98.722		1	68	919.136
1	103.7	48.668		1	103.7	1097.62
1	137.7	21.155		1	137.7	1176
1	170	1.965		1	170	1308.94
2	0	103.578		2	0	902.489
2	34	4.162		2	34	884.687
2	68	3.237		2	68	985.259
2	103.7	0.925		2	103.7	1073.92
2	137.7	1.503		2	137.7	1318.53
2	170	1.503		2	170	1448.12
3	0	421.478		3	0	746.892
3	34	398.589		3	34	731.864
3	68	298.595		3	68	804.345
3	103.7	87.278		3	103.7	906.535
3	137.7	1.503		3	137.7	1035.08
3	170	0.809		3	170	1156.35
4	0	305.184		4	0	176.521
4	34	121.38		4	34	163.458
4	68	51.095		4	68	197.676
4	103.7	14.797		4	103.7	224.495
4	137.7	2.081		4	137.7	262.874
4	170	1.618		4	170	336.396
5	0	393.156		5	0	639.384
5	34	375.238		5	34	695.219
5	68	239.408		5	68	746.776
5	103.7	39.188		5	103.7	828.737
5	137.7	10.173		5	137.7	941.909
5	170	2.312		5	170	1095.89
6	0	497.196		6	0	985.722
6	34	409.802		6	34	1066.41
6	68	341.598		6	68	1163.86
6	103.7	296.745		6	103.7	1319
6	137.7	167.389		6	137.7	1364.77
6	170	71.094		6	170	1476.33
7	0	267.152		7	0	733.367
7	34	51.095		7	34	804.692
7	68	6.705		7	68	964.567
7	103.7	1.04		7	103.7	1121.78
7	137.7	1.387		7	137.7	1251.83
7	170	0.694		7	170	1429.05
8	0	172.706		8	0	766.081
8	34	36.761		8	34	871.393
8	68	3.121		8	68	948.845
8	103.7	0.809		8	103.7	1039.94
8	137.7	1.734		8	137.7	1131.84
8	170	0.925		8	170	1184.44
9	0	498.121		9	0	893.357
9	34	399.051		9	34	1057.74
9	68	217.906		9	68	1131.49
9	103.7	152.476		9	103.7	1264.78
9	137.7	58.147		9	137.7	1340.73
9	170	4.277		9	170	1387.55
10	0	643.892		10	0	500.779
10	34	505.866		10	34	579.041
10	68	301.369		10	68	661.926
10	103.7	56.528		10	103.7	703.426
10	137.7	7.63		10	137.7	843.302
10	170	1.156		10	170	897.981
11	0	340.442		11	0	588.867
11	34	301.254		11	34	671.867
11	68	255.014		11	68	783.768
11	103.7	56.297		11	103.7	870.121
11	137.7	7.514		11	137.7	1022.02
11	170	2.428		11	170	1077.28
12	0	336.743
12	34	238.483
12	68	188.544
12	103.7	79.302
12	137.7	24.738
12	170	4.855
