# Supplementary material for: Apical contacts stemming from incomplete delamination guide progenitor cell allocation through a dragging mechanism
Source: eLife. 2021 Aug 27;10:e66483. doi: 10.7554/eLife.66483 (PMC8460252; doi:10.7554/eLife.66483)
Supplement: Figure 2—source data 1. [file elife-66483-fig2-data1.xlsx]

## Sheet: Fig.2B
			EMBRYO 1						EMBRYO 2						EMBRYO 3
	Time		Protrusions medial right	Protrusions medial left	Protrusions Vegetal	Protrusions Animal	Total		Protrusions medial right	Protrusions medial left	Protrusions Vegetal	Protrusions Animal	Total		Protrusions medial right	Protrusions medial left	Protrusions Vegetal	Protrusions Animal	Total
	16		5	5	5	3.75	18.75		3	1.5	0	7.5	12		3.5	9.5	0.75	6.75	20.5
	32		4.25	4	4.25	1.75	14.25		2.5	1	0.5	4	8		6.75	12	0.75	6	25.5
	48		3.25	7.75	3.25	4.25	18.5		3	2.5	1.5	3.5	10.5		8.125	9.5	0.25	8.5	26.375
	64		2.75	2.75	2.75	5.5	13.75		5.5	4	0	4.5	14		5.125	8	1.5	11.75	26.375
	80		1.5	3.75	1.5	5.25	12		2.5	3.5	1	2	9		5.375	8.5	5.25	10	29.125
	96		2.25	2.5	2.25	6	13		3	2	0	5	10		1.75	2.25	2.25	4	10.25
	112		2.75	3	2.75	5.25	13.75		4	3	0	6	13		1.5	3.25	3.25	0.75	8.75
	128		1.75	3.25	1.75	4	10.75		3	2.5	1	4.5	11		1	3	3	1.75	8.75
	144		3.125	4.5	3.125	4.75	15.5		2.5	3	0	7	12.5		1.75	1	1	0.75	4.5
	160		1.875	1.75	1.875	3.75	9.25		3	2	0.5	6	11.5		1.75	2	2	1.25	7
	176		1.5	4.375	1.5	4.125	11.5		2.5	2	1	1.5	7		1	1.75	1.75	1.75	6.25
	192		1.375	2.125	1.375	5.125	10		4.5	2	0.5	4	11		2	1.75	1.75	0.25	5.75
	208		3.625	1.125	3.625	8.25	16.625		3.5	6	2	6.5	18		2	2.25	2.25	1	7.5
	224		2.5	2	2.5	4	11		6	4.5	1	6.5	18		1	0.75	0.75	0.5	3
		Normalized
			Protrusions medial right	Protrusions medial left	Protrusions Vegetal	Protrusions Animal			Protrusions medial right	Protrusions medial left	Protrusions Vegetal	Protrusions Animal			Protrusions medial right	Protrusions medial left	Protrusions Vegetal	Protrusions Animal
			0.266667	0.266667	0.266667	0.2			0.25	0.125	0	0.625			0.170732	0.463415	0.0365854	0.329268
			0.298246	0.280702	0.298246	0.122807			0.3125	0.125	0.0625	0.5			0.264706	0.470588	0.0294118	0.235294
			0.175676	0.418919	0.175676	0.22973			0.285714	0.238095	0.142857	0.333333			0.308057	0.36019	0.00947867	0.322275
			0.2	0.2	0.2	0.4			0.392857	0.285714	0	0.321429			0.194313	0.303318	0.056872	0.445498
			0.125	0.3125	0.125	0.4375			0.277778	0.388889	0.111111	0.222222			0.184549	0.291845	0.180258	0.343348
			0.173077	0.192308	0.173077	0.461538			0.3	0.2	0	0.5			0.170732	0.219512	0.219512	0.390244
			0.2	0.218182	0.2	0.381818			0.307692	0.230769	0	0.461538			0.171429	0.371429	0.371429	0.0857143
			0.162791	0.302326	0.162791	0.372093			0.272727	0.227273	0.0909091	0.409091			0.114286	0.342857	0.342857	0.2
			0.201613	0.290323	0.201613	0.306452			0.2	0.24	0	0.56			0.388889	0.222222	0.222222	0.166667
			0.202703	0.189189	0.202703	0.405405			0.26087	0.173913	0.0434783	0.521739			0.25	0.285714	0.285714	0.178571
			0.130435	0.380435	0.130435	0.358696			0.357143	0.285714	0.142857	0.214286			0.16	0.28	0.28	0.28
			0.1375	0.2125	0.1375	0.5125			0.409091	0.181818	0.0454545	0.363636			0.347826	0.304348	0.304348	0.0434783
			0.218045	0.0676692	0.218045	0.496241			0.194444	0.333333	0.111111	0.361111			0.266667	0.3	0.3	0.133333
			0.227273	0.181818	0.227273	0.363636			0.333333	0.25	0.0555556	0.361111			0.333333	0.25	0.25	0.166667
			Sum medial prot.
				Mean Protrusions medial	Protrusions Vegetal	Protrusions Animal				Mean Protrusions medial	Protrusions Vegetal	Protrusions Animal				Mean Protrusions medial	Protrusions Vegetal	Protrusions Animal
				0.266667	0.266667	0.2				0.1875	0	0.625				0.317073	0.0365854	0.329268
				0.289474	0.298246	0.122807				0.21875	0.0625	0.5				0.367647	0.0294118	0.235294
				0.297297	0.175676	0.22973				0.261905	0.142857	0.333333				0.334123	0.00947867	0.322275
				0.2	0.2	0.4				0.339286	0	0.321429				0.248815	0.056872	0.445498
				0.21875	0.125	0.4375				0.333333	0.111111	0.222222				0.238197	0.180258	0.343348
				0.182692	0.173077	0.461538				0.25	0	0.5				0.195122	0.219512	0.390244
				0.209091	0.2	0.381818				0.269231	0	0.461538				0.271429	0.371429	0.0857143
				0.232558	0.162791	0.372093				0.25	0.0909091	0.409091				0.228571	0.342857	0.2
				0.245968	0.201613	0.306452				0.22	0	0.56				0.305556	0.222222	0.166667
				0.195946	0.202703	0.405405				0.217391	0.0434783	0.521739				0.267857	0.285714	0.178571
				0.255435	0.130435	0.358696				0.321429	0.142857	0.214286				0.22	0.28	0.28
				0.175	0.1375	0.5125				0.295455	0.0454545	0.363636				0.326087	0.304348	0.0434783
				0.142857	0.218045	0.496241				0.263889	0.111111	0.361111				0.283333	0.3	0.133333
				0.204545	0.227273	0.363636				0.291667	0.0555556	0.361111				0.291667	0.25	0.166667
			Mean/SD/SE Embryos		Mean Protrusions medial						Protrusions Vegetal						Protrusions Animal
				Mean	SD	SE				Mean	SD	SE				Mean	SD	SE
				0.25708	0.0653164	0.0377104				0.101084	0.144561	0.0834622				0.384756	0.217866	0.125785
				0.291957	0.0744796	0.0430008				0.130052	0.146596	0.0846373				0.286034	0.193648	0.111803
				0.297775	0.0361116	0.020849				0.109337	0.088023	0.0508201				0.295113	0.0568926	0.032847
				0.2627	0.0706734	0.0408033				0.085624	0.103053	0.0594979				0.388975	0.062765	0.0362374
				0.263427	0.0613166	0.0354012				0.13879	0.0365776	0.0211181				0.334357	0.10792	0.0623077
				0.209271	0.0358153	0.020678				0.130863	0.115685	0.0667905				0.450594	0.0556905	0.0321529
				0.249917	0.0353733	0.0204228				0.190476	0.185897	0.107328				0.30969	0.198022	0.114328
				0.237043	0.0113966	0.00657983				0.198852	0.129787	0.0749328				0.327061	0.111582	0.0644222
				0.257174	0.0438649	0.0253254				0.141278	0.122784	0.0708893				0.344373	0.19939	0.115118
				0.227065	0.0369187	0.021315				0.177298	0.1231	0.0710718				0.368572	0.174524	0.100761
				0.265621	0.0514758	0.0297196				0.184431	0.0829982	0.047919				0.284327	0.0723021	0.0417437
				0.265514	0.0798696	0.0461127				0.162434	0.131235	0.0757688				0.306538	0.239667	0.138372
				0.230026	0.0761143	0.0439446				0.209719	0.0947193	0.0546862				0.330228	0.183414	0.105894
				0.262626	0.0502995	0.0290404				0.177609	0.106311	0.0613786				0.297138	0.112999	0.0652398

## Sheet: Fig.2C
			EMBRYO 1						EMBRYO 2						EMBRYO 3
	Time		Protrusions medial right	Protrusions medial left	Protrusions Vegetal	Protrusions Animal	Total		Protrusions medial right	Protrusions medial left	Protrusions Vegetal	Protrusions Animal	Total		Protrusions medial right	Protrusions medial left	Protrusions Vegetal	Protrusions Animal	Total
	16		51.1856	48.8851	25.8804	40.7056	166.657		15.6834	28.6322	0	52.1974	96.513		18.7042	31.6756	2.9533	31.6756	85.0088
	32		43.3895	51.0578	32.2706	36.4242	163.142		21.8763	3.13667	0.482565	20.1069	45.6024		23.279	50.264	1.38979	40.8251	115.758
	48		53.8695	111.573	38.7247	72.5289	276.696		48.0956	24.0478	4.9865	43.833	120.963		35.6133	31.9651	1.04234	55.5916	124.212
	64		24.6023	26.6472	27.8613	43.0061	122.117		49.2216	36.9162	0.482565	19.383	106.003		31.2123	16.3879	24.8425	31.7914	104.234
	80		11.4385	34.1237	32.015	46.2012	123.778		24.5304	27.0236	6.83634	8.52531	66.9157		29.533	29.533	27.2167	24.495	110.778
	96		26.136	22.0462	20.5765	50.6744	119.433		36.8358	26.2194	0	27.7475	90.8026		27.7958	29.3014	22.1787	35.2659	114.542
	112		38.4052	27.8613	38.7247	61.6016	166.593		41.9027	57.1839	0	35.6294	134.716		32.66	20.4994	54.8967	5.03799	113.094
	128		21.0877	51.2495	50.2271	69.5894	192.154		20.3482	28.6322	5.38864	30.4016	84.7706		11.8132	24.6108	32.7759	12.3923	81.5922
	144		52.0163	54.7961	52.8151	75.2447	234.872		48.0956	26.2194	0	48.3369	122.652		17.3145	10.4234	12.6239	6.25405	46.6158
	160		24.0911	37.5105	50.3549	35.242	147.198		22.2784	44.5568	6.59505	32.3319	105.762		12.9135	13.1451	8.97572	13.6084	48.6426
	176		14.1863	80.6764	13.1638	42.0156	150.042		9.81215	21.2329	10.7773	10.7773	52.5996		16.4458	19.457	22.6999	12.7976	71.4004
	192		9.87287	14.4419	3.61047	32.3025	60.2277		14.1552	19.3026	4.26266	35.8707	73.5912		14.2453	22.8736	14.3612	2.08468	53.5648
	208		21.535	17.9245	6.80557	48.7893	95.0544		30.0799	45.6024	13.914	34.8251	124.421		28.259	10.8867	23.9739	15.8088	78.9284
	224		39.8749	19.1706	9.96873	29.2672	98.2814		59.5968	48.2565	17.9353	43.6721	169.461		12.5081	15.2877	12.3923	8.8599	49.048
		Normalized
			Protrusions medial right	Protrusions medial left	Protrusions Vegetal	Protrusions Animal			Protrusions medial right	Protrusions medial left	Protrusions Vegetal	Protrusions Animal			Protrusions medial right	Protrusions medial left	Protrusions Vegetal	Protrusions Animal
			0.307132	0.293328	0.155291	0.244248			0.1625	0.296667	0	0.540833			0.220027	0.372616	0.0347411	0.372616
			0.265962	0.312965	0.197807	0.223267			0.479718	0.0687831	0.010582	0.440917			0.201101	0.434217	0.012006	0.352676
			0.194688	0.403233	0.139954	0.262125			0.397606	0.198803	0.0412234	0.362367			0.286713	0.257343	0.00839161	0.447552
			0.201465	0.21821	0.228153	0.352172			0.46434	0.348255	0.00455235	0.182853			0.299444	0.157222	0.238333	0.305
			0.0924109	0.275684	0.258647	0.373258			0.366587	0.403846	0.102163	0.127404			0.266597	0.266597	0.245687	0.221119
			0.218834	0.184591	0.172285	0.424291			0.405669	0.288751	0	0.30558			0.242669	0.255814	0.19363	0.307887
			0.230533	0.167242	0.232451	0.369774			0.311045	0.424478	0	0.264478			0.288786	0.18126	0.485407	0.0445469
			0.109744	0.266711	0.26139	0.362155			0.240038	0.337761	0.0635674	0.358634			0.144784	0.301632	0.401703	0.151881
			0.221466	0.233302	0.224867	0.320365			0.392131	0.21377	0	0.394098			0.371429	0.223602	0.270807	0.134161
			0.163664	0.25483	0.342088	0.239418			0.210646	0.421293	0.0623574	0.305703			0.265476	0.270238	0.184524	0.279762
			0.0945486	0.537692	0.0877342	0.280026			0.186544	0.40367	0.204893	0.204893			0.230333	0.272506	0.317924	0.179238
			0.163926	0.239788	0.0599469	0.53634			0.19235	0.262295	0.0579235	0.487432			0.265946	0.427027	0.268108	0.0389189
			0.226555	0.188571	0.0715966	0.513277			0.241758	0.366516	0.111829	0.279897			0.358034	0.137931	0.303742	0.200293
			0.405722	0.195059	0.10143	0.297789			0.351685	0.284765	0.105838	0.257712			0.255018	0.311688	0.252656	0.180638
			Sum medial prot.
				Mean Protrusions medial	Protrusions Vegetal	Protrusions Animal				Mean Protrusions medial	Protrusions Vegetal	Protrusions Animal				Mean Protrusions medial	Protrusions Vegetal	Protrusions Animal
				0.30023	0.155291	0.244248				0.229583	0	0.540833				0.296322	0.0347411	0.372616
				0.289463	0.197807	0.223267				0.27425	0.010582	0.440917				0.317659	0.012006	0.352676
				0.298961	0.139954	0.262125				0.298205	0.0412234	0.362367				0.272028	0.00839161	0.447552
				0.209838	0.228153	0.352172				0.406297	0.00455235	0.182853				0.228333	0.238333	0.305
				0.184047	0.258647	0.373258				0.385216	0.102163	0.127404				0.266597	0.245687	0.221119
				0.201712	0.172285	0.424291				0.34721	0	0.30558				0.249242	0.19363	0.307887
				0.198888	0.232451	0.369774				0.367761	0	0.264478				0.235023	0.485407	0.0445469
				0.188227	0.26139	0.362155				0.288899	0.0635674	0.358634				0.223208	0.401703	0.151881
				0.227384	0.224867	0.320365				0.302951	0	0.394098				0.297516	0.270807	0.134161
				0.209247	0.342088	0.239418				0.31597	0.0623574	0.305703				0.267857	0.184524	0.279762
				0.31612	0.0877342	0.280026				0.295107	0.204893	0.204893				0.251419	0.317924	0.179238
				0.201857	0.0599469	0.53634				0.227322	0.0579235	0.487432				0.346486	0.268108	0.0389189
				0.207563	0.0715966	0.513277				0.304137	0.111829	0.279897				0.247982	0.303742	0.200293
				0.30039	0.10143	0.297789				0.318225	0.105838	0.257712				0.283353	0.252656	0.180638
			Mean/SD/SE Embryos		Mean Protrusions medial						Protrusions Vegetal						Protrusions Animal
				Mean	SD	SE				Mean	SD	SE				Mean	SD	SE
				0.275378	0.0397077	0.0229253				0.0633442	0.0815013	0.0470548				0.385899	0.148738	0.0858739
				0.293791	0.0220254	0.0127164				0.0734648	0.107685	0.0621722				0.338953	0.109472	0.0632038
				0.289731	0.0153361	0.00885429				0.0631896	0.0684766	0.039535				0.357348	0.0928157	0.0535872
				0.28149	0.108482	0.0626319				0.157013	0.132133	0.0762869				0.280008	0.0873823	0.0504502
				0.27862	0.101122	0.0583828				0.202166	0.0868469	0.0501411				0.240593	0.124078	0.0716367
				0.266055	0.0741917	0.0428346				0.121972	0.106168	0.0612963				0.345919	0.0678817	0.0391915
				0.267224	0.0889227	0.0513395				0.239286	0.242776	0.140167				0.226266	0.165946	0.0958092
				0.233445	0.0511107	0.0295088				0.24222	0.169881	0.0980809				0.29089	0.120398	0.069512
				0.27595	0.0421472	0.0243337				0.165225	0.144921	0.0836702				0.282875	0.133962	0.0773432
				0.264358	0.0534474	0.0308579				0.196323	0.140238	0.0809665				0.274961	0.0334023	0.0192848
				0.287549	0.033006	0.019056				0.203517	0.115101	0.0664536				0.221385	0.0523789	0.030241
				0.258555	0.0772079	0.044576				0.12866	0.12077	0.0697267				0.35423	0.27416	0.158286
				0.253227	0.0485002	0.0280016				0.162389	0.124057	0.0716242				0.331156	0.162666	0.0939155
				0.300656	0.0174375	0.0100675				0.153308	0.0860663	0.0496904				0.24538	0.0595416	0.0343764
										0.550757	0.587582	0.579462	0.562979	0.557241	0.532109	0.534448	0.46689	0.5519	0.528716	0.575098	0.51711	0.506455	0.601312
										0.0633442	0.0734648	0.0631896	0.157013	0.202166	0.121972	0.239286	0.24222	0.165225	0.196323	0.203517	0.12866	0.162389	0.153308
										0.385899	0.338953	0.357348	0.280008	0.240593	0.345919	0.226266	0.29089	0.282875	0.274961	0.221385	0.35423	0.331156	0.24538

## Sheet: Fig. 2D
Shied Stage			60% epiboly			80% epiboly
Podia ID	Podia Angle Degree (º)		Podia ID	Podia Angle Degree (º)		Podia ID	Podia Angle Degree (º)
1	206.565		1	0		1	225
2	284.036		2	189.462		2	248.199
3	82.875		3	180		3	270
4	296.565		4	333.435		4	108.435
5	63.4349		5	99.4623		5	45
6	135		6	21.8014		6	74.0546
7	6.3402		7	33.6901		7	294.775
8	11.3099		8	135		8	341.565
9	48.8141		9	0		9	18.4349
10	10.4915		10	315		10	323.13
11	21.8014		11	236.31		11	71.5651
12	53.1301		12	0		12	26.5651
13	315		13	101.31		13	305.538
14	25.0169		14	51.3402		14	19.6538
15	20.556		15	53.1301		15	53.9726
16	206.565		16	36.8699		16	45
17	52.3058		17	356.186		17	308.66
18	303.69		18	345.964		18	350.538
19	244.654		19	0		19	329.036
20	90		20	315		20	261.87
21	3.5763		21	78.6901		21	270
22	128.66		22	107.103		22	63.4349
23	296.565		23	45		23	100.305
24	251.565		24	326.31		24	225
25	104.036		25	191.31		25	61.1892
26	79.3803		26	333.435		26	278.13
27	0		27	68.1986		27	341.565
28	344.055		28	315		28	333.435
29	90		29	53.1301		29	288.435
30	5.7106		30	296.565		30	36.8699
31	18.4349		31	344.055		31	306.87
32	276.34		32	296.565		32	303.69
33	260.538		33	0		33	334.799
34	198.435		34	75.9638		34	340.201
35	135		35	50.1944		35	45
36	0		36	18.4349		36	5.7106
37	33.6901		37	82.875		37	147.265
38	71.5651		38	9.4623		38	18.4349
39	12.5288		39	39.0939		39	329.036
40	26.5651		40	8.1301		40	21.8014
41	347.471		41	296.565		41	251.565
42	333.435		42	15.2551		42	341.565
43	203.963		43	355.426		43	322.431
44	10.8855		44	222.709		44	39.8056
45	45		45	270		45	74.0546
46	7.125		46	265.236		46	100.784
47	98.1301		47	32.0054		47	19.9831
48	304.992		48	331.699		48	246.801
49	63.4349		49	284.036		49	341.565
50	5.7106		50	35.5377		50	225
51	321.34		51	68.1986		51	313.025
52	99.4623		52	90		52	38.6598
53	48.0128		53	333.435		53	284.036
54	216.254		54	263.29		54	315
55	35.1342		55	282.529		55	45
56	0		56	342.897		56	45
57	341.565		57	0		57	301.43
58	82.875		58	26.5651		58	32.0054
59	56.3099		59	284.827		59	36.0274
60	48.8141		60	63.4349		60	331.389
61	41.9872		61	250.974		61	55.008
62	90		62	0		62	45
63	329.036		63	315		63	329.036
64	84.2894		64	245.556		64	21.8014
65	45		65	56.3099		65	251.565
66	343.301		66	302.471		66	341.565
67	0		67	11.3099		67	322.431
68	336.038		68	0		68	124.992
69	296.565		69	188.531		69	126.027
70	333.435		70	158.963		70	270
71	0		71	270		71	315
72	2.2906		72	201.801		72	317.291
73	333.435		73	251.565		73	63.4349
74	348.69		74	66.0375		74	291.25
75	303.69		75	342.897		75	186.34
76	38.6598		76	68.1986		76	0
77	45		77	278.13		77	77.7352
78	258.69		78	355.601		78	69.444
79	312.274		79	307.875		79	239.036
80	29.2488		80	60.2551		80	100.305
81	35.5377		81	270		81	333.435
82	53.9726		82	280.008		82	319.399
83	315		83	135		83	341.565
84	279.462		84	0		84	45
85	0		85	21.3706		85	40.6013
86	45		86	327.995		86	266.634
87	349.992		87	349.695		87	358.21
88	206.565		88	315		88	3.8141
89	90		89	245.556		89	315
90	0		90	56.3099		90	296.565
91	315		91	302.471		91	9.4623
92	26.5651		92	11.3099		92	180
93	213.69		93	0		93	71.5651
94	258.69		94	122.005		94	239.036
95	279.462		95	263.66		95	277.595
96	341.565		96	171.87		96	190.008
97	48.8141		97	340.017		97	255.964
98	63.4349		98	150.255		98	326.31
99	71.5651		99	283.24		99	85.9144
100	348.69		100	327.529		100	293.199
101	53.9726		101	33.6901		101	105.945
102	323.13		102	45		102	281.31
103	345.964		103	29.0546		103	344.055
104	63.4349		104	116.565		104	45
105	336.038		105	353.29		105	321.34
106	315		106	0		106	333.435
107	8.5308		107	264.289		107	36.8699
108	315		108	38.6598		108	349.38
109	0		109	300.964		109	315
110	146.31		110	341.565		110	54.4623
111	333.435		111	327.995		111	273.366
112	0		112	349.695		112	37.875
113	188.13		113	315		113	306.254
114	194.036		114	245.556		114	296.565
115	354.289		115	56.3099		115	9.4623
116	333.435		116	302.471		116	257.471
117	348.69		117	11.3099		117	259.992
118	63.4349		118	0		118	333.435
119	180		119	222.274		119	311.634
120	135		120	303.69		120	300.141
121	333.435		121	326.31		121	251.565
122	108.435		122	326.31		122	263.29
123	0		123	282.529		123	333.435
124	26.5651		124	0		124	345.964
125	300.964		125	300.964		125	11.8887
126	90		126	315		126	320.194
127	341.565		127	0		127	26.5651
128	36.8699		128	315		128	26.5651
129	7.125		129	341.565		129	126.87
130	348.69		130	348.69		130	172.304
131	258.69		131	326.31		131	176.82
132	279.462		132	166.239		132	233.13
133	341.565		133	341.565		133	21.8014
134	48.8141		134	293.199		134	35.5377
135	63.4349		135	74.0546		135	286.699
136	71.5651		136	95.7106		136	333.435
137	348.69		137	246.801		137	80.5377
138	53.9726		138	333.435		138	26.5651
139	323.13		139	270		139	335.225
140	345.964		140	240.945		140	354.289
141	63.4349		141	320.194		141	353.991
142	336.038		142	315		142	337.38
143	225		143	26.5651		143	341.565
144	26.5651		144	298.301		144	278.746
145	263.66		145	9.4623		145	63.4349
146	38.6598		146	218.66		146	45
147	75.9638		147	296.565		147	100.305
148	315		148	30.2564		148	281.31
149	22.6199		149	281.31		149	117.646
150	357.709		150	18.4349		150	26.5651
151	165.964		151	309.289		151	270
152	333.435		152	63.4349		152	337.166
153	347.471		153	326.31		153	120.964
154	35.5377		154	354.957		154	333.435
155	45		155	165.964		155	92.4896
156	28.6105		156	248.199		156	0
157	336.038		157	9.4623		157	315
158	113.199		158	323.13		158	90
159	330.255		159	303.69		159	270
160	281.31		160	11.3099		160	276.843
161	247.62		161	277.595		161	123.69
162	97.125		162	326.31		162	304.825
163	0		163	104.036		163	87.1376
164	323.13		164	21.8014		164	211.607
165	36.8699		165	26.5651		165	341.565
166	7.125		166	328.57		166	30.9638
167	348.69		167	0		167	14.0362
168	258.69		168	320.194		168	6.009
169	279.462		169	315		169	45
170	341.565		170	26.5651		170	21.8014
171	48.8141		171	298.301		171	57.7244
172	63.4349		172	9.4623		172	0
173	71.5651		173	333.435		173	337.38
174	348.69		174	220.601		174	341.565
175	53.9726		175	18.4349		175	278.746
176	323.13		176	10.3048		176	63.4349
177	345.964		177	0		177	45
178	63.4349		178	326.31		178	326.31
179	336.038		179	341.565		179	206.565
180	253.301		180	33.6901		180	18.4349
181	106.699		181	4.7636		181	270
182	255.964		182	333.435		182	77.9052
183	228.013		183	298.611		183	14.0362
184	219.806		184	319.764		184	53.6156
185	33.6901		185	282.265		185	251.565
186	38.047		186	40.6013		186	282.995
187	147.995		187	318.013		187	9.4623
188	210.964		188	330.255		188	90
189	270		189	45		189	71.5651
190	333.435		190	104.036		190	288.435
191	315		191	21.8014		191	33.6901
192	77.0054		192	26.5651		192	227.045
193	329.744		193	328.57		193	116.565
194	47.4896		194	0		194	45
195	299.745		195	320.194		195	341.565
196	22.6199		196	315		196	315
197	288.435		197	26.5651		197	308.66
198	65.2249		198	298.301		198	52.125
199	119.745		199	9.4623		199	55.008
200	45		200	45		200	25.2011
201	329.036		201	233.616		201	278.881
202	329.534		202	0		202	57.7244
203	296.565		203	338.199		203	0
204	333.435		204	201.801		204	337.38
205	333.435		205	90		205	341.565
206	310.914		206	0		206	278.746
207	341.565		207	36.3844		207	63.4349
208	48.8141		208	243.435		208	45
209	63.4349		209	0		209	275.711
210	71.5651		210	0		210	255.964
211	348.69		211	315		211	56.3099
212	53.9726		212	105.524		212	290.556
213	323.13		213	333.435		213	165.964
214	345.964		214	0		214	326.31
215	63.4349		215	333.435		215	239.421
216	336.038		216	239.744		216	341.565
217	264.289		217	45		217	129.806
218	239.036		218	75.9638		218	53.1301
219	90		219	0		219	291.801
220	23.1986		220	90		220	45
221	49.7636		221	33.6901		221	293.962
222	36.8699		222	341.565		222	90
223	341.565		223	203.199		223	297.646
224	20.2249		224	326.31		224	315
225	320.194		225	194.036		225	319.399
226	98.1301		226	45		226	315
227	113.199		227	315		227	348.69
228	284.036		228	79.992		228	90
229	14.9314		229	99.4623		229	64.9831
230	243.435		230	18.4349		230	55.008
231	333.435		231	321.34		231	25.2011
232	51.3402		232	26.5651		232	278.881
233	266.186		233	345.964		233	57.7244
234	74.7449		234	341.565		234	0
235	15.9454		235	348.69		235	337.38
236	49.3987		236	270		236	341.565
237	259.38		237	0		237	278.746
238	309.806		238	315		238	63.4349
239	3.5763		239	315		239	45
240	341.565		240	303.69
241	267.138		241	320.194
242	287.65		242	138.367
243	310.914		243	333.435
244	341.565		244	315
245	48.8141		245	0
246	63.4349		246	135
247	71.5651		247	225
248	348.69		248	345.964
249	53.9726		249	351.87
250	323.13		250	351.87
251	345.964		251	323.973
252	63.4349		252	0
253	336.038		253	303.69
254	320.194		254	315
255	296.565		255	333.435
256	333.435		256	5.7106
257	309.806		257	33.6901
258	321.34		258	341.565
259	0		259	203.199
260	270		260	326.31
261	0		261	194.036
262	0		262	45
263	341.565		263	315
264	20.556		264	79.992
265	49.3987		265	99.4623
266	0		266	18.4349
267	345.964		267	321.34
268	26.5651		268	26.5651
269	15.9454		269	345.964
270	31.6075		270	341.565
271	74.7449		271	348.69
272	15.9454
273	49.3987
274	259.38
275	309.806
276	3.5763
277	341.565
278	267.138
279	287.65
280	310.914
281	341.565
282	48.8141
283	63.4349
284	71.5651
285	348.69
286	53.9726
287	323.13
288	345.964
289	63.4349
290	336.038
291	78.6901
292	270
293	12.5288
294	0
295	331.389
296	38.6598
297	315
298	303.69
299	90
300	0
301	46.9749
302	270
303	284.621
304	11.3099
305	270
306	302.005
307	140.194
308	108.435
309	26.5651
310	341.565
311	244.983
312	26.5651
313	315
314	350.538
315	326.31
316	333.435
317	310.914
318	341.565
319	48.8141
320	63.4349
321	71.5651
322	348.69
323	53.9726
324	323.13
325	345.964
326	63.4349
327	336.038
328	270
329	305.538
330	329.036
331	75.0686
332	246.801
333	90
334	33.6901
335	171.87
336	71.5651
337	9.8658
338	23.6294
339	270
340	284.621
341	11.3099
342	270
343	302.005
344	140.194
345	108.435
346	26.5651
347	341.565
348	244.983
349	26.5651
350	315
351	350.538
352	326.31
353	333.435
354	310.914
355	341.565
356	48.8141
357	63.4349
358	71.5651
359	348.69
360	53.9726
361	323.13
362	345.964
363	63.4349
364	336.038
365	172.405
366	66.0375
367	108.435
368	0
369	243.435
370	29.7449
371	320.194
372	323.13
373	326.31
374	120.964
375	68.1986
376	341.565
377	315
378	11.3099
379	270
380	302.005
381	140.194
382	108.435
383	26.5651
384	341.565
385	244.983
386	26.5651
387	315
388	350.538
389	326.31
390	333.435
391	310.914
392	341.565
393	48.8141
394	63.4349
395	71.5651
396	348.69
397	53.9726
398	323.13
399	345.964
400	63.4349
401	336.038

## Sheet: Fig2.J-K
	EMBRYO CONTROL 1
	X position	Y position	X position	Y position	X position	Y position	X position	Y position	X position	Y position	X position	Y position	X position	Y position	X position	Y position	X position	Y position	X position	Y position	X position	Y position	X position	Y position	X position	Y position	X position	Y position	X position	Y position	X position	Y position	X position	Y position	X position	Y position	X position	Y position	X position	Y position	X position	Y position	X position	Y position	X position	Y position	X position	Y position	X position
	0	0	0	0	0	0	0	0	0	0	0	0	0	0	0	0	0	0	0	0	0	0	0	0	0	0	0	0	0	0	0	0	0	0	0	0	0	0	0	0	0	0	0	0	0	0	0	0	0
	-1.925	-2.887	0	6.096	2.246	4.492	-0.962	8.663	0.321	5.776	-0.321	6.096	2.888	5.294	0.482	8.182	1.925	3.369	0.321	5.133	0.321	4.813	0.642	9.305	-0.962	5.454	-0.482	4.332	-1.443	6.738	0.481	6.738	2.407	3.369	2.888	1.203	0.962	3.529	0	4.172	3.209	7.7	0	6.738	2.567	4.813	1.259	5.664	0
	-1.284	4.332	1.925	11.871	3.529	10.589	0	12.513	1.284	10.909	-0.642	13.797	3.85	10.588	-0.962	13.476	0	8.182	0.963	11.23	-0.321	10.268	1.283	17.326	-2.246	10.909	-3.369	10.107	-2.406	12.513	0.481	11.551	3.851	8.182	3.129	3.369	1.283	7.7	0.642	8.343	3.85	11.872	-0.481	11.069	4.813	9.947	1.888	12.588	3.147
	-3.53	9.145	4.492	18.449	2.566	16.364	0	18.288	1.605	17.647	-0.963	17.968	5.294	15.401	-1.443	19.251	0.481	13.958	1.925	16.042	-1.283	16.685	-1.925	22.46	-3.529	17.967	-3.369	14.439	-2.406	18.77	0.481	16.364	6.257	11.07	3.851	6.256	2.246	10.909	0.962	14.439	5.134	17.647	0	16.845	3.85	15.08	3.776	18.253	6.294
	-5.455	14.278	5.134	24.866	2.246	21.818	2.407	24.064	1.926	24.385	-1.284	25.347	5.776	24.064	-2.887	25.989	1.443	20.214	3.85	24.385	-1.925	23.744	-2.888	27.273	-4.171	25.026	-4.813	20.214	-3.368	25.027	0.481	21.177	6.257	14.92	6.738	12.513	2.246	17.647	2.888	19.252	5.134	21.497	2.406	22.139	5.455	20.535	6.294	27.694	8.182
	-5.776	18.77	5.455	31.283	0.962	26.631	0.482	31.764	4.172	31.444	-0.642	33.369	8.182	29.839	-3.85	31.764	1.925	24.064	4.813	29.197	-1.925	30.802	-1.925	34.332	-4.492	33.208	-4.332	27.433	-3.85	31.765	2.407	27.433	4.332	19.733	11.07	19.492	1.283	22.46	5.134	22.46	6.417	25.668	1.925	29.358	6.417	26.31	6.923	33.359	10.07
	-5.134	24.867	4.813	35.454	0.641	35.615	-0.481	37.058	4.172	35.615	-1.284	37.54	8.182	36.577	-2.887	37.54	5.294	28.877	4.652	35.775	-3.85	36.578	-2.567	39.786	-6.417	39.304	-4.813	34.171	-4.812	35.615	4.332	34.171	0	23.102	14.198	26.47	-2.246	25.989	4.813	22.781	7.38	31.444	3.369	33.69	7.38	32.406	8.182	40.282	11.329
	-5.134	30	4.813	42.192	0.32	43.637	-0.481	43.796	4.813	41.711	0	42.673	9.144	43.796	-2.887	40.909	5.775	33.69	4.011	42.834	-5.455	43.637	-1.925	45.561	-6.417	45.4	-5.776	39.465	-5.294	43.797	6.738	41.872	-1.925	27.433	19.252	33.208	-4.172	30.802	2.888	26.952	7.059	36.898	5.294	41.39	8.021	37.861	6.923	46.576	13.217
	-4.813	35.776	4.171	49.251	0.962	49.412	0.482	50.053	2.888	46.203	0.962	49.091	11.551	50.053	-1.925	46.684	3.85	40.428	3.369	49.572	-3.85	50.695	-1.284	49.732	-5.775	52.138	-8.182	44.759	-2.887	50.535	8.182	49.572	0	30.802	24.786	42.593	-5.134	34.652	7.059	33.69	6.738	42.032	9.144	48.128	9.305	43.636	6.923	52.87	13.847
	-4.171	40.588	2.567	55.026	-1.605	53.583	0.963	56.31	2.567	52.3	0.962	54.224	11.07	54.866	-2.406	50.053	1.925	47.166	2.727	54.705	-4.171	58.717	-0.963	52.299	-5.775	57.272	-8.182	49.091	-2.406	57.754	5.294	56.31	1.444	36.578	26.711	47.887	-5.134	40.748	7.861	42.995	7.059	49.732	10.588	52.46	9.305	48.449	9.441	60.423	15.105
	-4.492	47.006	3.851	60.802	-0.963	59.358	0.963	63.048	2.407	55.989	2.567	61.604	11.07	59.678	-1.443	55.828	0	53.904	3.369	61.764	-4.011	66.257	-0.642	56.15	-3.529	63.689	-9.626	55.348	-2.887	62.567	5.294	62.086	2.888	42.834	27.193	56.31	-2.567	48.128	8.182	50.054	6.417	53.903	10.588	60.641	9.626	55.187	10.7	67.347	16.364
	-4.813	53.102	4.813	68.823	-0.963	64.492	0	69.304	2.728	59.519	2.887	69.304	10.588	67.86	-0.962	61.604	-0.963	62.086	4.973	69.144	-4.011	73.636	-2.567	60.321	-4.331	69.304	-10.107	64.011	-2.887	71.23	2.407	67.861	3.369	47.647	32.487	64.491	-1.926	55.508	7.861	50.695	7.38	60	10.588	67.379	10.107	63.208	14.476	71.123	15.735
	-3.209	58.877	5.776	75.882	-0.963	71.23	-1.443	76.042	3.69	62.406	2.887	77.005	10.107	72.673	-0.962	65.935	-1.926	67.861	4.652	72.673	-3.69	79.091	-5.134	64.492	-1.764	75.721	-9.145	70.267	-4.331	76.042	0	72.674	5.776	51.497	34.412	72.192	-1.926	59.358	6.577	55.508	7.059	62.887	12.513	73.636	8.503	67.059	16.365	81.194	15.735
	-3.209	62.407	5.776	82.62	0	77.005	-3.85	83.261	3.049	66.257	0.321	84.064	10.107	78.448	0	69.785	-0.482	74.118	4.332	76.844	-4.652	84.866	-5.776	70.267	-1.444	81.817	-8.182	76.524	-1.925	81.337	-0.481	77.968	4.332	56.31	34.893	77.967	-2.567	64.491	5.615	58.396	7.701	70.267	11.069	78.449	9.465	74.759	16.994	86.229	15.735
	-3.53	66.898	3.209	90.32	-1.284	81.497	-3.368	88.555	3.69	71.39	-0.321	92.085	9.626	83.261	0.482	74.598	0	78.93	4.332	82.62	-4.973	92.888	-7.701	74.438	-3.048	88.876	-8.182	82.299	-0.962	88.556	0	83.262	5.294	65.455	33.449	87.593	-3.209	75.4	4.652	62.246	8.663	74.278	10.588	84.705	9.465	79.572	16.994	94.412	17.623
	-3.85	71.711	4.332	96.577	-0.963	86.631	-3.85	93.85	2.086	77.807	-0.642	99.465	9.626	88.074	0	77.967	1.443	85.187	4.011	88.716	-4.011	98.021	-8.984	78.93	-5.615	94.651	-9.145	87.593	0	95.294	-0.481	87.594	2.888	70.267	35.134	95.534	-2.888	82.459	5.936	71.872	10.267	78.128	11.069	90	10.428	85.989	19.512	100.706	18.882
	-3.209	79.412	4.332	103.956	-0.642	93.369	-4.812	100.587	1.444	84.225	-0.642	106.203	9.626	92.406	-0.481	83.261	1.925	90.481	5.294	92.887	-4.652	102.192	-8.984	84.706	-8.823	99.143	-10.107	93.85	-0.481	100.588	-1.925	91.925	0.482	76.524	37.3	100.106	-3.851	89.197	5.615	77.326	11.872	83.262	12.032	93.85	12.674	94.01	19.512	108.888	17.623
	-2.888	84.225	3.369	108.769	-2.567	99.786	-5.294	107.807	1.123	91.925	-1.605	110.694	11.07	98.181	-0.962	87.593	1.925	95.775	5.294	97.379	-5.615	107.005	-8.021	94.01	-11.711	104.277	-12.032	99.144	-1.443	106.844	-2.887	96.738	1.444	80.856	39.947	105.16	-5.134	93.047	2.406	80.856	14.118	87.754	12.994	98.663	12.674	99.465	19.512	114.553	17.623
	-2.567	90.963	3.69	116.149	-4.492	103.957	-7.219	113.101	1.123	95.775	-2.246	116.791	13.957	103.475	-1.925	91.443	0.481	101.069	5.294	103.154	-4.973	112.781	-8.663	98.502	-12.353	110.694	-12.032	106.363	-1.443	113.582	-3.85	101.551	2.407	85.668	40.909	108.529	-4.492	97.219	2.406	83.422	17.326	93.208	13.957	106.363	13.636	104.598	20.141	118.33	17.623
	-2.246	94.171	3.69	122.887	-3.69	109.091	-7.219	118.876	0.482	101.871	-3.69	121.283	13.957	108.769	-2.406	99.144	2.406	106.845	5.294	108.93	-5.294	117.914	-7.38	104.599	-15.24	116.149	-11.551	111.657	-0.962	118.395	-4.331	106.364	0.963	92.888	45	112.379	-3.851	101.39	4.652	87.273	17.647	97.379	14.92	110.695	12.674	106.524	20.141	124.624	16.364
	-3.53	97.059	3.69	127.379	-3.049	114.866	-5.294	122.726	0.482	107.005	-4.011	127.7	12.513	116.47	-1.443	102.994	2.406	112.139	6.578	114.384	-4.332	121.764	-8.021	112.941	-17.165	120.962	-12.514	118.395	0	123.689	-5.294	111.176	0.482	99.144	47.407	116.229	-0.963	108.769	7.54	95.294	19.251	102.513	17.807	113.582	13.315	111.978	21.4	130.288	17.623
	EMBRYO CONTROL 2
	X position	Y position	X position	Y position	X position	Y position	X position	Y position	X position	Y position	X position	Y position	X position	Y position	X position	Y position	X position	Y position	X position	Y position	X position	Y position	X position	Y position	X position	Y position	X position	Y position	X position	Y position	X position	Y position	X position	Y position	X position	Y position	X position	Y position	X position	Y position	X position	Y position	X position	Y position	X position	Y position	X position	Y position	X position
	0	0	0	0	0	0	0	0	0	0	0	0	0	0	0	0	0	0	0	0	0	0	0	0	0	0	0	0	0	0	0	0	0	0	0	0	0	0	0	0	0	0	0	0	0	0	0	0	0
	-1.155	7.506	-1.155	6.351	1.154	6.929	-2.31	9.815	-1.732	6.35	-0.578	4.042	0	5.774	-1.155	5.773	0.577	6.928	-0.577	6.928	-1.732	4.041	0	5.196	-3.464	8.083	-1.732	9.238	-3.464	10.969	-2.887	6.928	-0.577	4.041	0	11.546	1.155	13.279	-1.732	8.082	-0.577	6.35	-3.464	10.97	-2.886	8.083	0	7.506	0
	-0.577	14.434	-0.578	14.434	-0.578	13.279	-2.887	19.053	0	11.546	0.577	10.97	-1.732	12.125	-2.31	13.856	-2.309	12.701	-1.155	9.815	-3.464	10.392	-4.041	10.969	-6.351	15.011	-4.041	14.434	-8.083	17.32	-4.619	13.856	-0.577	5.773	2.31	19.052	2.309	21.939	-1.732	16.743	-5.774	13.279	-5.196	15.589	-4.618	16.166	-1.155	16.166	0.577
	-2.31	23.094	-1.155	20.784	-1.733	17.898	-4.619	27.136	0	17.32	-2.887	20.207	-2.309	20.208	-4.042	21.362	-4.042	18.475	-2.309	15.011	-6.928	18.475	-7.505	17.897	-8.661	20.207	-5.773	20.207	-10.392	24.248	-6.928	20.784	-1.732	8.083	1.155	26.557	2.309	31.754	-3.464	28.867	-6.351	21.939	-5.774	22.517	-6.928	23.094	-0.577	22.516	-1.732
	-4.042	30.022	-1.155	29.445	-2.887	24.826	-8.661	38.105	-0.578	25.98	-2.887	27.135	-4.041	26.558	-5.196	27.712	-6.351	24.826	-3.464	19.052	-7.505	22.516	-8.082	23.093	-10.393	27.713	-5.773	27.713	-12.701	32.331	-9.238	25.403	-1.732	17.32	2.31	34.063	2.887	38.682	-6.351	38.682	-7.506	24.248	-8.66	28.868	-9.815	29.445	-1.732	28.29	-3.464
	-4.042	36.95	-2.31	36.95	-1.733	33.486	-11.547	46.765	-1.155	30.599	-2.887	33.486	-2.886	31.754	-5.196	36.372	-7.506	31.754	-5.196	23.671	-7.505	28.867	-9.814	32.908	-11.547	35.795	-6.35	35.795	-15.011	40.991	-10.392	31.754	-2.887	26.558	2.31	42.146	2.309	47.92	-9.237	46.765	-9.815	32.331	-11.547	38.682	-10.392	37.528	-2.309	36.95	-5.774
	-5.196	46.188	-1.732	44.456	-4.042	39.837	-12.125	55.425	-2.31	33.485	-5.196	40.992	-3.464	38.683	-6.928	45.033	-11.547	36.95	-6.928	32.331	-8.083	31.176	-10.969	39.836	-13.279	43.301	-8.082	44.456	-17.897	47.342	-9.815	36.95	-4.041	31.177	4.042	49.651	3.464	53.693	-9.237	51.383	-12.124	38.104	-11.547	44.456	-15.011	45.61	-2.887	46.188	-3.464
	-5.196	53.116	-4.619	50.806	-4.619	45.033	-13.279	63.508	-3.464	38.104	-6.928	46.765	-8.082	44.456	-9.238	50.806	-11.547	43.878	-8.083	38.105	-10.969	39.259	-13.279	46.187	-15.589	49.074	-9.814	51.384	-20.784	56.58	-8.083	42.146	-5.196	39.259	4.619	58.889	4.041	62.353	-10.969	56.579	-12.702	45.033	-12.124	52.539	-15.588	54.271	-3.464	53.116	-0.578
	-6.351	61.199	-4.042	60.621	-6.351	51.961	-12.702	73.323	-4.619	44.455	-7.506	54.271	-8.66	50.807	-12.125	57.157	-14.434	51.961	-6.928	43.301	-11.547	43.301	-14.433	53.115	-19.63	58.889	-10.392	58.312	-22.516	66.394	-10.392	48.497	-3.464	44.456	4.619	64.085	5.196	71.013	-15.588	62.353	-15.011	53.115	-15.589	62.354	-15.588	63.508	-5.774	60.621	-1.732
	-6.928	68.127	-5.196	66.972	-7.506	60.622	-10.393	80.829	-2.887	51.961	-7.506	60.044	-8.66	58.312	-10.97	62.93	-13.856	56.579	-8.083	50.806	-10.969	46.765	-14.433	59.466	-20.207	66.972	-11.547	64.663	-25.403	73.9	-13.279	55.425	-4.041	47.92	4.619	69.281	5.774	78.519	-17.898	68.126	-16.743	60.044	-17.898	68.127	-17.897	71.014	-7.506	68.127	-3.464
	-7.506	76.21	-6.351	72.745	-8.661	67.55	-6.929	88.911	-3.464	57.734	-7.506	66.972	-10.969	63.508	-10.97	69.281	-14.434	63.508	-8.083	53.693	-10.969	53.693	-16.743	65.817	-23.671	74.478	-13.279	73.9	-26.558	81.405	-15.011	61.198	-5.196	53.116	3.464	76.786	5.774	86.024	-22.516	75.054	-19.63	64.662	-19.053	75.055	-20.784	79.096	-7.506	74.477	-4.042
	-7.506	83.138	-8.66	78.519	-8.661	71.591	-4.042	98.726	-4.042	65.239	-9.238	72.746	-12.701	69.282	-10.97	73.323	-14.434	68.126	-6.351	57.157	-13.279	61.198	-15.011	73.322	-24.249	82.56	-13.856	79.674	-27.712	92.375	-17.898	66.394	-6.928	57.157	3.464	83.715	6.928	95.262	-24.248	80.251	-19.052	69.858	-20.207	83.715	-21.361	87.179	-8.083	78.519	-6.351
	-6.928	90.066	-9.815	84.292	-8.661	77.365	-1.733	109.696	-2.887	73.9	-10.392	79.674	-12.701	76.21	-10.393	80.251	-15.588	76.787	-5.773	62.931	-13.279	65.24	-16.743	79.673	-23.094	88.334	-13.856	87.179	-31.176	98.726	-16.166	73.9	-6.351	61.199	2.887	89.488	6.928	103.345	-24.826	83.137	-19.052	73.9	-23.094	92.375	-22.516	96.417	-9.815	83.138	-8.083
	-9.238	97.571	-10.392	91.22	-9.238	83.715	2.886	118.933	-3.464	79.096	-7.506	86.602	-12.124	82.561	-10.393	86.024	-16.166	81.983	-5.196	66.972	-12.124	73.323	-19.052	86.601	-24.249	99.303	-13.279	95.839	-30.022	107.386	-16.166	81.983	-3.464	65.817	3.464	96.416	5.774	110.273	-28.29	87.756	-20.207	81.983	-23.094	98.726	-23.671	103.922	-11.547	87.756	-10.393
	-8.66	106.232	-9.815	96.994	-10.97	89.489	5.773	129.326	-0.578	87.179	-7.506	96.994	-12.701	89.489	-10.97	91.22	-17.32	86.024	-6.928	69.281	-15.011	80.828	-19.629	93.529	-23.671	106.809	-13.856	103.345	-30.022	114.891	-16.166	88.333	-2.309	71.013	2.887	104.499	6.928	119.51	-28.29	93.529	-17.898	89.488	-24.249	107.386	-24.826	113.16	-13.856	93.53	-10.393
	-9.238	112.582	-7.506	105.077	-10.393	94.685	8.66	139.14	-0.578	95.261	-6.351	101.035	-12.124	94.685	-10.393	96.416	-18.475	91.22	-8.083	70.436	-16.166	88.333	-19.629	100.458	-26.558	117.201	-15.011	111.428	-31.176	123.552	-13.856	95.261	-3.464	73.323	1.732	109.118	8.66	129.325	-32.909	97.571	-17.898	98.148	-24.826	114.892	-25.98	121.82	-16.166	99.303	-9.238
	-9.815	120.665	-6.928	112.582	-10.97	102.19	13.278	147.801	0.577	103.922	-7.506	108.541	-11.547	102.19	-9.815	101.612	-19.63	96.994	-7.505	74.478	-17.32	95.839	-20.207	107.963	-25.981	125.284	-15.011	119.51	-30.599	132.212	-15.011	105.654	-3.464	77.942	2.887	113.159	8.66	134.521	-34.641	102.767	-18.475	104.499	-25.981	122.975	-28.29	131.635	-16.166	102.767	-5.774
	RAC1-T17N (1)
	X position	Y position	X position	Y position	X position	Y position	X position	Y position	X position	Y position	X position	Y position	X position	Y position	X position	Y position	X position	Y position	X position	Y position	X position	Y position	X position	Y position	X position	Y position	X position	Y position	X position	Y position	X position	Y position	X position	Y position	X position	Y position	X position	Y position	X position	Y position	X position	Y position	X position	Y position	X position	Y position	X position	Y position	X position
	0	0	0	0	0	0	0	0	0	0	0	0	0	0	0	0	0	0	0	0	0	0	0	0	0	0	0	0	0	0	0	0	0	0	0	0	0	0	0	0	0	0	0	0	0	0	0	0	0
	-5.035	8.812	0	8.183	1.259	11.329	0.629	11.959	-2.518	12.588	-3.777	10.071	-0.63	7.553	-1.889	10.07	-3.147	9.441	-3.147	12.588	-1.259	11.33	0.629	9.442	1.052	7.89	0.526	6.311	-1.052	8.415	-0.526	8.415	-1.578	7.89	-2.103	7.363	-3.156	8.942	1.052	7.364	0	12.624	-2.104	8.942	2.103	12.097	1.052	9.468	0
	-6.294	23.918	-0.63	17.624	-0.63	21.4	-0.63	24.547	-3.777	22.029	-3.777	21.4	-3.147	18.253	-3.777	22.029	-5.035	24.547	-3.147	22.029	-3.147	19.512	-3.777	20.771	-2.104	15.253	-2.104	14.201	-0.526	17.357	2.63	21.039	-4.734	18.935	-5.259	19.987	-5.26	20.513	-2.63	19.987	-5.26	25.773	-3.682	19.461	2.103	22.091	-1.578	22.617	0
	-7.553	32.729	0	25.177	-2.518	29.582	-2.518	32.729	-5.665	33.359	-4.406	29.583	-2.518	28.324	-6.924	32.729	-5.664	33.359	-5.035	34.618	-5.035	31.471	-4.406	30.212	-3.156	23.669	-1.578	21.564	1.578	29.454	4.208	29.98	-9.468	29.98	-6.311	27.35	-8.416	29.455	-3.682	29.454	-5.26	34.714	-3.156	28.928	1.578	33.662	-4.208	31.559	-1.578
	-8.811	44.688	-1.259	35.248	-5.665	39.023	-3.777	39.023	-6.294	42.8	-5.036	39.024	-3.147	37.765	-8.183	44.059	-9.441	42.8	-8.182	42.8	-8.182	42.801	-9.441	40.912	-3.156	30.506	-2.104	25.772	-1.052	37.87	1.052	39.973	-12.624	41.026	-9.993	37.344	-12.098	35.24	-5.26	37.87	-6.312	43.13	-3.682	38.396	1.578	38.922	-6.311	42.078	-6.837
	-8.811	57.277	0.629	47.207	-5.036	49.723	-2.518	50.353	-6.924	49.724	-6.924	47.836	-3.147	47.836	-9.442	51.612	-12.588	53.501	-9.441	54.13	-9.441	52.242	-12.589	50.983	-2.63	38.396	0.526	36.291	3.156	46.285	3.156	49.441	-15.779	49.441	-21.038	50.493	-17.883	46.286	-6.838	50.493	-7.364	52.071	-3.682	45.233	1.578	49.441	-11.045	51.019	-4.207
	-13.217	69.236	1.888	59.795	-3.777	60.423	0	58.535	-5.665	60.424	-7.553	58.536	-6.924	57.277	-10.7	62.941	-15.105	61.054	-9.441	64.83	-13.218	60.424	-13.847	61.054	1.052	48.389	2.63	42.603	5.26	54.175	2.104	57.33	-21.039	58.383	-24.194	62.59	-21.565	58.383	-8.415	58.909	-9.468	62.591	-2.63	53.649	2.103	56.804	-0.526	56.279	-5.259
	-14.476	79.936	1.888	66.089	-3.777	67.976	0.629	66.718	-7.553	68.606	-10.071	67.348	-7.553	66.718	-13.847	72.383	-15.735	71.754	-12.588	77.418	-15.735	71.124	-13.847	70.495	0.526	58.909	3.682	46.285	3.682	65.746	4.208	68.902	-24.195	69.428	-26.824	73.635	-23.669	69.428	-10.519	67.324	-11.572	71.532	-3.156	63.642	2.629	66.798	-1.052	64.169	-6.837
	-17.623	91.265	1.888	75.53	-3.147	76.159	-3.777	73.641	-8.812	76.789	-11.33	75.53	-6.294	76.789	-15.106	83.083	-18.253	80.565	-16.365	86.23	-18.253	79.936	-16.994	79.936	5.26	69.428	7.89	52.07	5.26	74.161	3.682	77.317	-28.403	81.525	-33.662	87.836	-27.351	83.103	-13.149	79.421	-13.675	80.999	-3.682	69.954	1.052	73.109	-1.578	73.11	-8.941
	-18.882	100.706	1.888	83.713	-3.777	85.6	-0.63	85.6	-8.182	86.23	-11.33	83.712	-6.924	88.118	-15.736	91.894	-19.511	91.265	-18.253	95.671	-20.771	91.895	-21.4	90.636	4.208	77.317	8.416	61.012	8.416	80.999	5.26	85.207	-33.136	93.622	-36.291	99.408	-29.455	91.519	-13.149	90.467	-14.727	91.519	-4.734	78.895	2.629	79.947	-2.104	81.526	-9.467
	-22.029	108.259	3.776	92.525	-4.406	96.3	-0.63	94.412	-10.071	92.524	-11.959	93.154	-5.665	96.301	-17.624	104.483	-21.4	98.818	-20.141	107.001	-22.659	100.077	-22.659	100.707	4.208	85.733	9.468	71.005	9.994	87.837	7.364	93.096	-35.766	100.986	-38.921	108.349	-29.981	99.408	-12.097	98.882	-14.201	103.616	-5.785	88.363	4.733	89.94	-3.682	90.993	-11.571
	-22.029	120.218	6.294	100.707	-3.147	105.112	1.888	101.965	-10.7	99.448	-14.477	104.483	-8.812	105.112	-18.883	113.924	-22.658	110.777	-21.4	117.071	-24.547	110.777	-25.806	112.666	5.26	96.778	12.623	79.947	8.942	96.778	8.416	100.46	-35.24	116.239	-39.973	123.602	-32.084	106.772	-13.675	109.927	-13.675	113.61	-6.311	95.726	7.363	97.83	-4.208	99.934	-12.623
	-25.806	129.03	9.441	106.372	-3.147	112.665	1.888	108.259	-11.33	109.518	-16.995	112.665	-9.441	113.924	-19.512	123.365	-26.435	116.442	-24.547	123.995	-25.806	117.701	-23.918	121.478	7.364	104.142	16.305	87.31	10.52	103.09	9.468	105.193	-36.292	126.758	-38.921	135.174	-32.61	112.032	-15.779	117.291	-15.253	123.603	-6.311	105.72	10.519	99.408	-6.837	107.824	-12.623
	-27.064	135.954			-1.888	123.365	1.888	116.442	-11.959	118.959	-17.624	120.218			-22.659	132.177	-27.694	123.366	-26.435	130.918	-27.694	123.366	-27.065	129.66	10.519	113.609	16.831	94.148	11.572	114.661	10.52	110.979	-38.922	138.33	-39.447	141.485	-33.662	118.343	-16.831	127.284	-17.883	133.596	-6.837	113.083	12.623	104.668	-6.837	118.343	-14.727
	RAC1-T17N (2)
	X position	Y position	X position	Y position	X position	Y position	X position	Y position	X position	Y position	X position	Y position	X position	Y position	X position	Y position	X position	Y position	X position	Y position	X position	Y position	X position	Y position	X position	Y position	X position	Y position	X position	Y position	X position	Y position	X position	Y position
	0	0	0	0	0	0	0	0	0	0	0	0	0	0	0	0	0	0	0	0	0	0	0	0	0	0	0	0	0	0	0	0	0	0
	3.147	11.959	-1.888	11.33	-0.629	10.071	-1.259	11.329	-0.629	10.7	-3.147	8.182	3.147	8.812	-3.208	8.984	-5.133	10.267	-0.641	9.626	0	12.192	-3.208	8.984	0.642	10.268	-1.925	8.342	0.642	9.626	-1.926	3.85	-0.641	12.834
	0.629	27.065	-3.776	22.659	-4.406	24.547	-3.776	23.917	-3.147	23.288	-5.664	18.253	-0.629	20.141	-2.566	20.534	-5.775	23.102	-5.133	23.743	-2.567	22.459	-4.492	17.326	-0.642	18.61	-3.208	18.609	-1.925	22.46	-5.134	13.476	-3.85	23.743
	-5.036	42.801	-7.553	34.618	-7.553	32.1	-6.294	33.988	-6.924	33.359	-8.811	28.324	-3.776	30.841	-5.775	31.443	-7.7	28.877	-7.059	33.369	-5.133	32.085	-5.775	25.026	-1.925	29.519	-7.7	37.219	-1.925	31.444	-5.776	24.385	-9.625	34.652
	-6.924	52.242	-8.182	44.059	-11.329	42.171	-8.182	45.947	-8.812	44.688	-12.588	37.765	-7.553	41.541	-7.058	38.502	-9.625	39.786	-12.192	42.353	-9.625	42.352	-9.625	32.727	-5.776	41.712	-12.834	42.994	-5.775	44.92	-8.984	34.011	-13.476	43.636
	-9.442	59.795	-11.329	52.242	-11.959	49.724	-10.7	55.388	-10.7	52.241	-15.106	47.206	-10.7	50.353	-10.909	44.919	-10.909	44.92	-13.476	51.978	-13.476	51.978	-12.192	42.352	-6.417	48.77	-12.834	51.978	-5.134	50.053	-12.835	41.07	-16.042	51.978
	-11.33	68.607	-15.106	62.942	-13.847	59.794	-13.217	63.57	-13.218	63.571	-15.735	54.13	-13.217	57.277	-16.042	53.903	-15.401	52.62	-14.117	55.829	-14.117	60.962	-13.476	50.053	-10.909	55.829	-16.684	61.604	-9.626	61.604	-14.76	47.487	-17.968	60.962
	-13.218	76.789	-13.847	70.495	-11.329	67.347	-14.476	73.641	-15.106	71.124	-18.253	61.053	-16.364	64.2	-19.251	62.245	-16.684	57.112	-12.192	62.887	-16.042	69.304	-14.117	57.112	-12.834	61.604	-17.967	68.021	-8.984	69.305	-17.968	51.979	-19.251	67.379
	-16.995	85.601	-15.735	82.454	-13.847	74.271	-16.365	83.712	-16.994	80.565	-18.253	68.606	-20.141	69.865	-25.026	65.454	-19.251	64.813	-15.401	69.304	-17.968	76.363	-18.609	66.737	-15.401	63.53	-21.818	77.646	-11.551	77.647	-20.535	59.037	-21.818	73.796
	-19.512	93.783	-18.253	91.265	-13.847	82.453	-18.253	91.894	-19.512	89.377	-20.77	77.418	-21.4	76.789	-25.668	77.005	-23.101	71.871	-17.968	77.647	-18.609	85.347	-19.251	73.796	-17.968	69.305	-23.101	85.347	-14.759	85.989	-23.102	68.021	-23.743	80.855
	-19.512	99.448	-16.994	100.077	-14.476	92.524	-20.141	103.224	-22.03	100.077	-23.288	88.118	-24.547	86.23	-25.026	86.63	-23.743	78.289	-21.818	86.631	-19.893	97.539	-19.251	83.422	-17.968	75.722	-26.31	93.047	-14.759	97.54	-25.669	80.855	-26.31	90.48
	-17.624	108.26	-16.994	109.519	-16.365	105.112	-20.77	111.406	-20.771	108.889	-24.547	96.93	-27.694	97.559	-25.668	97.539	-25.026	89.839	-26.31	97.54	-22.46	107.807	-23.101	91.122	-17.968	82.781	-26.951	101.39	-17.326	109.732	-28.236	88.556	-28.235	100.748
	-18.883	113.924			-16.994	113.924	-23.288	118.959	-22.659	119.589	-23.917	105.112	-33.988	104.483	-28.877	103.956	-26.951	98.182	-30.16	106.524	-21.818	114.224	-25.026	100.106	-22.46	90.481	-30.16	110.373	-18.609	116.791	-28.877	98.823	-29.518	109.09
	-21.401	123.366					-25.176	128.4	-24.547	127.771	-24.547	113.295	-35.876	115.812	-30.802	113.582	-26.951	105.24	-34.652	114.224	-22.46	121.924	-23.743	107.165	-23.743	98.182	-32.085	116.149	-20.535	125.133	-29.519	105.882	-30.16	120.641
	RAC1-T17N (3)
	X position	Y position	X position	Y position	X position	Y position	X position	Y position	X position	Y position	X position	Y position	X position	Y position	X position	Y position	X position	Y position	X position	Y position	X position	Y position	X position	Y position	X position	Y position	X position	Y position	X position	Y position
	0	0	0	0	0	0	0	0	0	0	0	0	0	0	0	0	0	0	0	0	0	0	0	0	0	0	0	0	0	0
	0	18.501	-4.625	14.389	-3.083	16.959	-3.084	10.279	-2.569	14.903	-2.57	17.986	-7.7	20.534	-5.776	14.117	-5.134	16.685	-5.775	19.251	-3.85	23.743	-5.134	17.968	-7.059	21.818	-6.417	18.61	-6.417	21.818
	-7.194	35.459	-10.278	35.973	-8.736	37.515	-4.626	26.723	-6.167	30.834	-6.167	35.973	-13.476	38.502	-12.193	34.01	-14.76	38.503	-12.834	41.711	-11.55	47.486	-12.834	39.145	-12.835	35.294	-12.192	34.011	-9.625	42.353
	-9.25	50.362	-13.876	51.904	-11.305	54.474	-5.653	41.113	-11.82	46.765	-11.306	54.987	-16.042	55.187	-15.401	52.62	-17.327	53.262	-17.967	62.246	-17.967	64.812	-16.043	53.262	-16.685	51.978	-18.609	52.62	-15.401	51.337
	-13.875	64.752	-22.612	68.349	-21.584	68.863	-8.223	55.502	-17.987	67.835	-16.959	66.293	-23.743	72.513	-23.102	65.454	-21.177	69.947	-26.31	83.422	-23.743	81.497	-25.668	74.439	-22.46	69.946	-20.534	65.454	-23.101	64.171
	-18.5	82.224	-32.376	83.252	-30.834	84.794	-13.876	76.572	-22.612	86.335	-25.182	83.766	-26.31	88.555	-25.027	84.705	-25.669	86.631	-30.802	100.107	-28.235	97.539	-30.802	88.556	-26.952	85.989	-26.952	81.497	-29.518	80.855
	-22.097	95.072	-43.168	101.239	-41.112	102.267	-16.445	93.531	-27.751	99.697	-33.404	101.752	-30.16	105.24	-26.952	100.106	-33.369	104.599	-38.502	114.224	-35.935	114.866	-36.577	107.166	-34.653	100.748	-33.369	102.032	-32.727	94.331
	-26.723	110.489	-45.738	117.17	-56.015	115.628	-22.612	107.406	-32.89	122.308	-39.571	118.197	-32.727	121.283	-34.653	110.374	-41.07	113.583	-44.278	125.775	-41.069	128.983	-46.203	133.476	-41.712	112.941	-39.786	114.224	-39.144	112.941
	-29.806	125.906	-46.765	127.962	-60.64	126.42	-26.209	121.795	-31.348	135.67	-43.168	132.586	-38.502	136.042	-35.294	121.283	-43.637	125.775	-49.411	134.759	-43.636	139.892	-48.128	142.46	-44.278	123.85	-41.069	130.267	-44.278	129.625
	-32.889	138.754	-47.279	140.295	-62.696	138.754	-29.293	133.615	-31.348	146.462	-47.279	144.92	-40.427	149.518	-39.145	132.192	-46.845	140.534	-53.903	148.876	-45.561	151.443	-51.978	159.144	-44.92	137.967	-42.994	143.743	-47.486	141.818
[truncated: 43 more columns]

## Sheet: Fig.2G
	Control			Rac1-T17N
cell ID	circularity		cell ID	circularity
1	0.41571		1	0.89095			Shapiro-Wilk	DF	Statistic	p-value	Decision at level(5%)
2	0.59231		2	0.91227			control	42	0.98844	0.9421	Can't reject normality
3	0.63117		3	0.91561			Rac1-T17N	62	0.91431	0.000363337	Reject normality
4	0.69735		4	0.92913
5	0.36084		5	0.9098
6	0.52649		6	0.79579			Kolmogorov-Smirnov Test	p-value
7	0.38981		7	0.78279				3.33067e-16
8	0.59328		8	0.89128
9	0.45563		9	0.87343
10	0.41137		10	0.87728
11	0.55606		11	0.90114
12	0.66143		12	0.9404
13	0.59479		13	0.90343
14	0.51062		14	0.94025
15	0.45112		15	0.92647
16	0.59001		16	0.83644
17	0.5439		17	0.93442
18	0.53283		18	0.95146
19	0.63276		19	0.91247
20	0.63945		20	0.93666
21	0.2218		21	0.85066
22	0.40472		22	0.89655
23	0.74582		23	0.91602
24	0.53808		24	0.91361
25	0.79399		25	0.90412
26	0.77713		26	0.93973
27	0.53252		27	0.92839
28	0.44702		28	0.91658
29	0.59082		29	0.93183
30	0.73378		30	0.87698
31	0.65621		31	0.87311
32	0.76869		32	0.85789
33	0.69513		33	0.83289
34	0.88082		34	0.89645
35	0.83482		35	0.80178
36	0.81894		36	0.85212
37	0.79389		37	0.92551
38	0.62709		38	0.8972
39	0.73025		39	0.88715
40	0.64814		40	0.85697
41	0.9203		41	0.85128
42	0.74981		42	0.92464
			43	0.96492
			44	0.92494
			45	0.90961
			46	0.88866
			47	0.8573
			48	0.9538
			49	0.91924
			50	0.94625
			51	0.94096
			52	0.78213
			53	0.88102
			54	0.80907
			55	0.93681
			56	0.8887
			57	0.91627
			58	0.89001
			59	0.71989
			60	0.82533
			61	0.95149
			62	0.80062
