# Supplementary material for: Apical contacts stemming from incomplete delamination guide progenitor cell allocation through a dragging mechanism
Source: eLife. 2021 Aug 27;10:e66483. doi: 10.7554/eLife.66483 (PMC8460252; doi:10.7554/eLife.66483)
Supplement: Figure 3—source data 1. [file elife-66483-fig3-data1.xlsx]

## Sheet: Fig3B-C
Cell ID	Start time (min)	Duration (min)	End time (min)
29	0	244.367	244.367
28	14.75	235.817	250.567
27	14.75	297.75	312.5
26	19.6667	295.267	314.933
25	19.6667	295.267	314.933
24	29.5	196.667	226.167
23	29.5	219.517	249.017
22	44.25	270.683	314.933
21	54.0833	248.683	302.767
20	59	193.117	252.117
19	68.8333	219.333	288.167
18	73.75	241.183	314.933
17	83.5833	179.383	262.967
16	88.5	186.867	275.367
15	88.5	194.8	283.3
14	88.5	226.433	314.933
13	93.4167	214.217	307.633
12	93.4167	221.517	314.933
11	98.3333	173.933	272.267
10	103.25	151.967	255.217
9	108.167	184.867	293.033
8	113.083	201.85	314.933
7	113.083	201.85	314.933
6	118	134.117	252.117
5	122.917	152.45	275.367
4	122.917	184.717	307.633
3	127.833	165.2	293.033
2	132.75	155.417	288.167
1	152.417	145.433	297.85

## Sheet: Fig.3E
	DFC cells						EVL cells
	Track ID	Point ID	X position	Y position			Track ID	Point ID	X position	Y position
	1	1	170.317	157.038			1	1	215.927	149.532
	1	2	170.894	163.389			1	2	214.772	157.038
	1	3	170.317	172.049			1	3	215.35	163.966
	1	4	169.739	180.131			1	4	213.617	172.626
	1	5	171.471	186.482			1	5	211.885	179.554
	1	6	169.739	193.988			1	6	211.885	186.482
	1	7	169.162	200.916			1	7	210.731	195.72
	1	8	167.43	208.421			1	8	210.731	202.648
	1	9	165.698	217.659			1	9	209.576	210.731
	1	10	165.698	224.01			1	10	208.999	217.659
	1	11	163.389	232.093			1	11	208.421	225.742
	1	12	164.543	240.175			1	12	208.421	232.67
	1	13	163.966	245.949			1	13	208.999	239.598
	1	14	162.811	252.3			1	14	206.689	247.103
	1	15	163.966	260.96			1	15	207.267	255.764
	1	16	161.079	269.043			1	16	206.689	262.114
	1	17	161.079	276.548			1	17	206.112	270.197
	1	18	159.924	282.899			1	18	206.689	276.548
	1	19	158.77	286.94			1	19	205.535	283.476
	1	20	159.924	293.868			1	20	206.112	291.559
	1	21	155.883	298.487			1	21	203.225	299.064
	1	22	155.883	304.838			1	22	201.493	307.725
	1	23	155.883	308.879			1	23	199.184	314.653
	1	24	157.038	315.807			1	24	196.297	323.89
	1	25	155.306	322.736			1	25	193.41	334.282
	1	26	151.842	330.241			1	26	188.214	344.675
	1	27	153.574	340.633			1	27	184.75	355.067
	1	28	155.306	349.871			1	28	183.018	366.036
	1	29	157.038	363.15			1	29	181.864	376.429
	1	30	158.192	379.315			1	30	181.286	387.976
	1	31	158.192	393.172			1	31	183.018	398.368
	1	32	159.347	404.719			1	32	184.173	408.76
	1	33	161.656	412.801			1	33	184.75	417.42
	1	34	165.698	422.616			1	34	185.328	426.08
	1	35	166.275	428.967			1	35	185.905	435.318
	1	36	165.698	436.472			1	36	186.482	444.555
	1	37	166.275	446.865			1	37	187.06	452.638
	1	38	170.317	459.566			1	38	189.369	463.03
	1	39	177.822	465.917			1	39	191.101	472.268
	2	1	184.173	155.883			2	1	248.258	155.306
	2	2	184.173	163.389			2	2	247.681	161.079
	2	3	183.018	172.049			2	3	248.835	169.739
	2	4	183.596	178.399			2	4	249.413	177.245
	2	5	182.441	184.173			2	5	249.413	185.328
	2	6	181.864	192.833			2	6	249.413	193.41
	2	7	181.286	202.071			2	7	249.99	201.493
	2	8	180.709	208.999			2	8	249.413	208.999
	2	9	178.399	216.504			2	9	248.835	216.504
	2	10	176.667	224.01			2	10	248.258	224.01
	2	11	176.667	230.36			2	11	248.835	230.938
	2	12	176.09	234.402			2	12	249.99	239.598
	2	13	174.358	239.021			2	13	251.145	247.103
	2	14	172.626	243.639			2	14	249.413	255.186
	2	15	170.317	249.413			2	15	250.568	261.537
	2	16	168.007	255.186			2	16	251.722	269.043
	2	17	168.007	258.65			2	17	251.722	276.548
	2	18	169.162	263.846			2	18	251.722	285.208
	2	19	169.739	268.465			2	19	251.145	292.136
	2	20	169.739	275.393			2	20	248.835	300.797
	2	21	169.162	280.589			2	21	248.835	308.879
	2	22	170.317	289.827			2	22	246.526	317.539
	2	23	173.781	296.178			2	23	244.217	325.622
	2	24	176.09	305.993			2	24	243.639	333.705
	2	25	178.977	312.343			2	25	239.598	345.252
	2	26	180.131	317.539			2	26	235.557	353.912
	2	27	178.977	325.622			2	27	233.247	366.614
	2	28	178.399	337.169			2	28	232.093	375.851
	2	29	178.977	346.984			2	29	229.783	387.398
	2	30	179.554	359.108			2	30	228.051	398.368
	2	31	183.596	371.233			2	31	228.628	411.069
	2	32	188.792	378.738			2	32	227.474	423.194
	2	33	190.524	386.821			2	33	225.742	432.431
	2	34	191.678	398.368			2	34	224.01	443.401
	2	35	193.988	408.76			2	35	224.01	454.947
	2	36	193.988	419.152			2	36	222.278	464.185
	2	37	195.72	431.854			2	37	224.01	474.577
	2	38	197.452	445.133			2	38	225.742	484.392
	2	39	202.071	456.68			2	39	226.896	493.052
	17	1	239.444	145.07			3	1	264.424	137.408
	17	2	236.324	151.31			3	2	263.269	143.759
	17	3	237.104	158.33			3	3	263.846	151.842
	17	4	237.884	168.469			3	4	263.269	158.192
	17	5	237.104	175.488			3	5	263.269	166.853
	17	6	237.884	185.628			3	6	262.114	174.358
	17	7	240.224	191.867			3	7	262.692	181.864
	17	8	241.784	200.447			3	8	259.805	188.214
	17	9	244.124	206.686			3	9	260.382	198.029
	17	10	242.564	210.586			3	10	259.228	204.38
	17	11	245.684	217.606			3	11	258.073	210.153
	17	12	246.464	223.065			3	12	255.764	215.927
	17	13	246.464	228.525			3	13	254.609	221.7
	17	14	245.684	233.205			3	14	254.032	228.628
	17	15	246.464	236.324			3	15	254.609	234.402
	17	16	247.244	241.784			3	16	256.918	242.485
	17	17	249.583	248.804			3	17	257.496	249.99
	17	18	254.263	253.483			3	18	257.496	258.65
	17	19	259.723	257.383			3	19	258.65	269.043
	17	20	260.503	259.723			3	20	258.65	275.971
	17	21	262.843	264.402			3	21	256.918	285.786
	17	22	265.182	271.422			3	22	256.918	295.6
	17	23	265.962	280.001			3	23	258.073	304.261
	17	24	265.962	287.801			3	24	257.496	312.921
	17	25	262.063	299.5			3	25	254.032	323.89
	17	26	260.503	310.419			3	26	252.3	334.282
	17	27	256.603	319.779			3	27	249.99	345.829
	17	28	252.703	329.138			3	28	248.835	356.222
	171	1	243.062	340.633			3	29	244.217	365.459
	171	2	236.134	349.293			3	30	242.485	377.006
	171	3	234.979	361.418			3	31	241.907	389.13
	171	4	230.36	371.233			3	32	237.866	400.1
	171	5	228.051	383.357			3	33	235.557	408.76
	171	6	227.474	393.749			3	34	232.093	418.575
	171	7	228.628	404.719			3	35	229.206	428.967
	171	8	228.051	415.111			3	36	225.742	439.359
	171	9	228.051	426.658			3	37	222.855	449.751
	171	10	228.628	440.514			3	38	223.432	459.566
	171	11	226.319	451.483			3	39	224.01	470.536
	172	1	253.454	335.437			4	1	236.134	112.005
	172	2	253.454	345.252			4	2	235.557	116.046
	172	3	253.454	360.263			4	3	233.247	123.552
	172	4	251.818	373.446			4	4	232.67	131.057
	172	5	251.049	384.993			4	5	232.67	136.831
	172	6	247.969	396.155			4	6	232.67	145.491
	172	7	244.89	410.781			4	7	232.67	151.264
	172	8	241.426	421.943			4	8	229.783	158.77
	172	9	241.811	433.105			4	9	230.36	167.43
	172	10	239.502	445.806			4	10	230.938	172.626
	172	11	237.192	456.198			4	11	230.938	178.977
	4	1	239.021	125.861			4	12	229.206	185.328
	4	2	239.021	129.903			4	13	229.206	192.256
	4	3	239.598	138.563			4	14	228.051	198.029
	4	4	237.289	147.8			4	15	226.896	206.689
	4	5	235.557	158.192			4	16	228.051	211.885
	4	6	233.247	166.853			4	17	227.474	220.546
	4	7	235.557	173.781			4	18	228.051	229.206
	4	8	238.443	183.018			4	19	227.474	236.711
	4	9	237.289	188.214			4	20	227.474	245.371
	4	10	235.557	194.565			4	21	225.742	255.186
	4	11	234.979	202.071			4	22	224.01	265.001
	4	12	232.67	207.267			4	23	222.278	272.507
	4	13	230.938	214.772			4	24	219.391	278.28
	4	14	228.628	219.968			4	25	216.504	290.404
	4	15	228.628	225.164			4	26	213.04	302.529
	4	16	229.783	232.67			4	27	209.576	313.498
	4	17	233.247	241.33			4	28	207.267	323.89
	4	18	236.134	250.568			4	29	202.071	335.437
	4	19	238.443	259.228			4	30	202.071	345.252
	4	20	241.33	263.846			4	31	201.493	358.531
	41	1	237.866	271.929			4	32	200.916	369.501
	41	2	240.753	285.786			4	33	200.916	381.625
	41	3	244.794	294.446			4	34	201.493	392.017
	41	4	243.062	305.415			4	35	201.493	402.986
	41	5	243.062	318.694			4	36	202.071	412.224
	41	6	240.753	329.086			4	37	203.225	421.462
	41	7	239.021	339.479			4	38	204.957	430.699
	41	8	238.443	346.984			4	39	206.689	438.205
	41	9	232.093	352.758			5	1	215.35	106.231
	41	10	229.206	360.84			5	2	216.504	113.16
	41	11	227.474	372.965			5	3	214.772	119.51
	41	12	221.123	381.625			5	4	213.617	124.129
	41	13	217.659	390.862			5	5	212.463	131.057
	41	14	215.927	403.564			5	6	213.617	139.717
	41	15	214.772	412.224			5	7	211.308	146.068
	41	16	214.772	423.194			5	8	210.731	151.264
	41	17	214.772	435.895			5	9	208.999	158.192
	41	18	214.772	447.442			5	10	207.844	166.853
	41	19	215.35	458.989			5	11	206.689	173.781
	42	1	248.258	260.382			5	12	206.689	177.822
	42	2	252.3	270.197			5	13	206.689	183.596
	42	3	250.568	278.28			5	14	206.112	189.946
	42	4	246.526	288.672			5	15	204.38	195.72
	42	5	243.062	299.064			5	16	204.957	200.916
	42	6	238.443	310.611			5	17	204.38	208.421
	42	7	235.557	321.004			5	18	204.38	214.195
	42	8	234.402	330.818			5	19	204.957	219.968
	42	9	229.206	337.169			5	20	206.112	226.896
	42	10	225.164	346.984			5	21	203.803	233.247
	42	11	221.7	359.108			5	22	201.493	243.062
	42	12	216.504	369.501			5	23	199.761	251.145
	42	13	214.195	380.47			5	24	198.607	258.65
	42	14	211.885	391.44			5	25	194.565	267.311
	42	15	210.731	402.409			5	26	191.101	278.28
	42	16	212.463	412.224			5	27	191.678	288.672
	42	17	212.463	423.194			5	28	190.524	300.797
	42	18	212.463	431.854			5	29	189.946	310.034
	42	20	213.04	442.823			5	30	188.214	319.849
	5	1	250.851	109.668			5	31	189.946	330.818
	5	2	248.33	111.559			5	32	187.637	338.901
	5	3	250.22	119.123			5	33	187.637	344.097
	5	4	250.851	128.577			5	34	190.524	346.407
	5	5	252.111	139.291			5	35	188.214	351.603
	5	6	252.741	147.485			5	36	189.369	357.954
	5	7	252.111	153.788			5	37	188.792	367.768
	5	8	252.111	160.091			5	38	189.369	374.697
	5	9	254.002	168.915			5	39	189.369	382.202
	5	10	255.263	174.587			6	1	178.977	114.892
	5	11	254.632	179.629			6	2	178.399	121.82
	5	12	254.002	187.193			6	3	178.977	128.748
	5	13	254.002	195.386			6	4	180.709	135.099
	5	14	254.002	202.95			6	5	179.554	142.027
	5	15	254.632	209.883			6	6	180.131	150.11
	5	16	254.632	215.555			6	7	178.977	158.77
	5	17	255.893	223.118			6	8	178.399	166.275
	5	18	259.675	228.791			6	9	177.822	172.626
	5	19	259.675	236.354			6	10	176.667	180.709
	5	20	260.935	242.657			6	11	176.09	188.214
	5	21	260.935	248.33			6	12	176.09	195.142
	5	22	261.565	254.632			6	13	176.09	202.071
	5	23	262.826	262.196			6	14	175.513	207.267
	5	24	259.044	271.65			6	15	174.358	217.082
	5	25	256.523	283.625			6	16	174.935	224.01
	5	26	255.263	294.34			6	17	173.781	230.36
	5	27	251.481	304.424			6	18	174.358	236.711
	5	28	247.681	314.653			6	19	175.513	244.794
	5	29	241.907	322.736			6	20	176.09	251.145
	5	30	237.866	335.437			6	21	173.781	257.496
	51	1	226.8	348.427			6	22	169.162	264.424
	51	2	223.721	360.744			6	23	168.007	271.352
	51	3	223.721	374.215			6	24	167.43	279.435
	51	4	221.027	388.072			6	25	163.389	288.095
	51	5	221.797	398.849			6	26	160.502	299.064
	51	6	222.951	407.317			6	27	158.77	308.302
	51	7	224.106	418.863			6	28	157.615	318.694
	51	8	225.645	428.101			6	29	156.46	328.509
	51	9	227.57	441.187			6	30	156.46	337.747
	52	1	243.736	348.812			6	31	157.038	346.984
	52	2	241.426	363.053			6	32	158.192	356.222
	52	3	241.041	375.755			6	33	160.502	356.222
	52	4	238.347	387.687			6	34	165.121	357.954
	52	5	238.347	400.004			6	35	166.853	358.531
	52	6	239.117	410.011			61	1	166.275	352.18
	52	7	236.807	420.403			61	2	168.007	357.376
	52	8	237.192	431.565			61	3	169.739	362.572
	52	9	237.192	441.572			61	4	169.739	368.346
	6	1	264.905	148.281			62	1	166.853	374.119
	6	2	262.98	154.825			62	2	166.853	382.202
	6	3	262.596	162.138			62	3	166.853	389.13
	6	4	262.211	171.375			62	4	169.739	395.481
	6	5	261.056	180.613			7	20	153.574	146.646
	6	6	262.596	187.541			7	21	155.306	153.574
	6	7	263.365	196.778			7	22	155.306	161.079
	6	8	263.365	204.091			7	23	155.306	169.162
	6	9	263.75	211.789			7	24	155.306	176.667
	6	10	265.675	218.717			7	25	154.728	183.596
	6	11	265.675	226.03			7	26	154.728	191.101
	6	12	266.06	230.264			7	27	154.151	198.029
	6	13	266.829	233.728			7	28	154.728	205.535
	6	14	269.139	241.426			7	29	155.306	213.617
	6	15	270.293	247.969			7	30	155.306	219.391
	6	16	269.524	252.973			7	31	155.883	226.319
	6	17	268.369	259.901			7	32	154.728	233.825
	6	18	269.524	265.29			7	33	154.151	240.175
	6	19	271.833	269.909			7	34	152.419	248.258
	6	20	271.833	276.067			7	35	150.687	255.764
	6	21	272.603	282.995			7	36	150.687	263.846
	6	22	272.603	290.308			7	37	150.687	270.197
	6	23	275.682	296.082			7	38	151.842	276.548
	6	24	272.988	306.474			7	39	149.532	286.363
	6	25	268.754	314.941			7	1	146.646	293.868
	6	26	269.909	325.719			7	2	144.336	303.683
	61	1	266.445	332.262			7	3	143.759	312.921
	61	2	261.826	336.111			7	4	142.027	321.004
	61	3	261.441	343.809			7	5	137.985	331.973
	61	4	258.362	353.046			7	6	135.099	340.633
	61	5	255.667	366.133			7	7	134.521	349.293
	61	6	251.434	376.14			7	8	133.367	357.376
	61	7	248.739	388.072			7	9	133.944	367.191
	61	8	246.045	402.313			7	10	136.253	374.697
	61	9	243.351	414.245			7	11	139.717	382.779
	61	10	242.581	425.407			7	12	142.604	392.594
	61	11	240.272	435.799			7	13	144.913	403.564
	61	12	239.117	445.036			7	14	149.532	412.801
	61	13	237.577	456.583			7	15	152.419	423.194
	62	1	269.524	342.654			7	16	155.306	433.008
	62	2	267.984	353.816			7	17	159.924	441.669
	62	3	263.75	364.593			7	18	162.234	451.483
	62	4	260.286	376.14			7	19	164.543	458.989
	62	5	258.362	389.226			8	1	144.336	105.077
	62	6	255.667	400.773			8	2	144.336	110.273
	62	7	252.588	411.166			8	3	144.336	116.046
	62	8	246.815	420.018			8	4	144.913	121.82
	62	9	242.966	431.565			8	5	144.336	131.057
	62	10	238.732	438.878			8	6	144.336	135.099
	62	11	237.192	447.346			8	7	144.913	142.604
	62	12	236.038	456.198			8	8	144.913	148.378
	62	13	234.883	465.436			8	9	144.913	152.419
	7	1	267.984	116.335			8	10	144.913	158.77
	7	2	265.675	121.723			8	11	144.336	168.585
	7	3	266.829	129.806			8	12	142.604	172.049
	7	4	267.214	138.659			8	13	141.449	179.554
	7	5	267.599	146.742			8	14	142.604	187.637
	7	6	268.754	154.825			8	15	141.449	193.988
	7	7	268.369	161.368			8	16	142.027	201.493
	7	8	269.524	167.526			8	17	142.027	209.576
	7	9	271.063	173.3			8	18	143.181	217.082
	7	10	271.448	177.918			8	19	143.759	224.587
	7	11	273.373	184.077			8	20	143.181	232.67
	7	12	272.603	191.775			8	21	142.027	239.021
	7	13	272.218	199.088			8	22	138.563	249.99
	7	14	273.373	205.246			8	23	136.831	257.496
	7	15	272.603	213.329			8	24	135.676	266.733
	7	16	273.373	219.872			8	25	134.521	275.393
	7	17	273.373	225.645			8	26	131.635	282.899
	7	18	274.912	232.574			8	27	131.635	288.095
	7	19	279.531	242.581			8	28	132.789	290.404
	7	20	280.686	251.434			8	29	129.903	292.136
	7	21	280.686	258.747			8	30	131.057	296.755
	7	22	281.455	266.06			8	31	135.099	305.415
	71	1	281.071	268.369			8	32	138.563	313.498
	71	2	278.376	275.682			8	33	139.717	321.581
	71	3	275.682	287.229			8	34	141.449	329.086
	71	4	273.758	299.93			8	35	143.181	336.015
	71	5	269.524	309.938			8	36	142.604	338.324
	71	6	264.135	318.406			8	37	143.759	344.675
	71	7	256.437	324.949			8	38	144.336	349.293
	71	8	253.743	336.881			8	39	144.336	355.067
	71	9	252.203	352.661			9	1	162.234	77.942
	71	10	246.045	369.212			9	2	160.502	84.292
	71	11	240.272	383.068			9	3	162.234	89.488
	71	12	235.268	396.924			9	4	162.234	95.262
	71	13	231.034	409.626			9	5	161.656	103.922
	71	14	227.955	419.633			9	6	161.079	108.541
	71	15	227.185	429.641			9	7	159.924	111.427
	71	16	225.261	439.263			9	8	158.77	116.046
	71	17	224.876	450.425			9	9	157.615	122.397
	72	1	284.15	282.995			9	10	159.347	129.903
	72	2	282.995	291.848			9	11	158.77	135.676
	72	3	277.606	301.47			9	12	158.192	143.181
	72	4	276.067	313.017			9	13	159.347	151.842
	72	5	276.067	322.639			9	14	158.77	157.038
	72	6	272.603	331.107			9	15	161.656	165.121
	72	7	268.369	338.42			9	16	161.656	173.203
	72	8	266.06	349.967			9	17	162.811	181.864
	72	9	264.905	363.053			9	18	164.543	188.792
	72	10	263.365	375.37			9	19	164.543	196.297
	72	11	261.056	387.302			9	20	162.234	201.493
	72	12	257.207	400.388			9	21	160.502	206.689
	72	13	255.667	414.245			9	22	155.883	207.844
	72	14	252.203	425.792			9	23	155.883	209.576
	72	15	251.049	437.723			9	24	154.728	215.35
	72	16	249.124	448.116			9	25	153.574	222.855
	72	17	246.045	458.508			9	26	148.378	230.36
	8	1	278.28	142.604			9	27	150.687	237.866
	8	2	276.548	148.955			9	28	152.419	244.217
	8	3	276.548	156.46			9	29	151.264	250.568
	8	4	277.125	166.853			9	30	151.264	256.918
	8	5	276.548	174.358			9	31	151.264	263.846
	8	6	277.703	181.864			9	32	151.842	271.929
	8	7	277.125	189.946			9	33	152.996	277.703
	8	8	276.548	197.452			9	34	154.728	283.476
	8	9	277.703	203.803			9	35	157.615	289.827
	8	10	277.125	210.731			9	36	154.728	292.136
	8	11	277.703	219.391			9	37	153.574	296.178
	8	12	275.971	224.587			9	38	152.996	301.374
	8	13	279.435	233.825			9	39	153.574	305.415
	8	14	281.744	242.485			10	1	210.153	76.209
	8	15	283.476	251.145			10	2	210.731	81.983
	8	16	283.476	258.65			10	3	210.731	88.334
	8	17	284.631	265.578			10	4	209.576	94.107
	8	18	286.94	273.084			10	5	207.267	99.303
	8	19	289.25	282.321			10	6	206.689	106.231
	8	20	290.982	287.518			10	7	205.535	110.85
	8	21	288.672	299.642			10	8	203.225	116.624
	81	1	290.885	303.779			10	9	203.225	122.974
	81	2	293.58	308.783			10	10	204.957	129.325
	81	3	292.81	316.866			10	11	202.648	136.831
	81	4	289.346	323.794			10	12	202.071	142.027
	81	5	289.346	331.877			10	13	200.916	148.378
	81	6	287.036	341.884			10	14	202.648	155.883
	81	7	281.263	349.582			10	15	202.648	161.079
	81	8	275.49	357.665			10	16	203.225	169.739
	81	9	270.486	366.902			10	17	202.071	177.822
	81	10	265.675	378.834			10	18	202.071	185.905
	81	11	261.441	390.766			10	19	200.339	195.72
	81	12	255.283	400.773			10	20	198.607	203.225
	81	13	248.354	411.935			10	21	198.029	211.308
	81	14	242.196	423.867			10	22	197.452	222.855
	81	15	239.117	432.335			10	23	193.988	231.515
	81	16	236.807	440.033			10	24	190.524	236.134
	81	17	232.959	451.195			10	25	184.173	239.598
	81	18	229.879	462.742			10	26	180.709	241.33
	82	1	285.304	310.708			10	27	178.977	245.371
	82	2	283.765	323.409			10	28	180.709	255.764
	82	3	280.301	330.337			10	29	179.554	261.537
	82	4	277.991	337.65			10	30	180.131	269.62
	82	5	279.531	345.733			10	31	179.554	280.589
	82	6	277.991	355.356			10	32	182.441	292.136
	82	7	277.222	364.208			10	33	183.018	300.219
	82	8	275.682	371.906			10	34	183.596	307.725
	82	9	271.833	381.913			10	35	183.596	314.075
	82	10	271.448	392.691			10	36	183.596	318.694
	82	11	268.754	405.777			10	37	185.905	326.2
	82	12	265.29	416.169			10	38	187.637	330.241
	82	13	258.747	427.331			10	39	189.369	336.015
	82	14	254.513	437.723			11	1	249.413	92.375
	82	15	249.894	445.806			11	2	248.835	96.417
	82	16	247.585	455.044			11	3	249.99	103.345
	82	17	244.505	466.206			11	4	246.526	112.582
	82	18	239.502	474.673			11	5	246.526	119.51
	9	1	287.036	133.078			11	6	246.526	125.861
	9	2	286.267	140.391			11	7	244.217	133.367
	9	3	283.572	147.319			11	8	242.485	139.14
	9	4	282.418	156.941			11	9	241.907	146.646
	9	5	281.263	166.179			11	10	241.907	152.419
	9	6	281.648	173.492			11	11	241.907	159.347
	9	7	280.493	180.805			11	12	240.175	165.121
	9	8	280.108	186.579			11	13	239.021	172.049
	9	9	279.723	192.737			11	14	241.907	178.977
	9	10	278.954	200.05			11	15	241.907	189.369
	9	11	278.954	207.363			11	16	243.062	193.41
	9	12	278.569	214.676			11	17	241.907	200.916
	9	13	279.723	220.834			11	18	237.866	208.999
	9	14	280.108	228.147			11	19	237.866	217.659
	9	15	279.723	235.075			11	20	239.021	223.432
	9	16	280.108	239.694			11	21	238.443	232.093
	9	17	281.648	245.468			11	22	239.598	240.175
	9	18	283.187	253.166			11	23	240.175	248.835
	9	19	285.112	262.018			11	24	237.289	257.496
	9	20	285.497	270.871			11	25	233.825	269.043
	9	21	286.267	278.184			11	26	230.36	278.857
	9	22	285.112	285.497			11	27	228.051	291.559
	9	23	286.267	294.734			11	28	225.742	304.838
	9	24	284.342	302.817			11	29	224.587	313.498
	9	25	281.648	311.285			11	30	222.855	325.622
	9	26	278.954	317.828			11	31	220.546	338.324
	9	27	276.644	327.066			11	32	218.814	349.293
	9	28	271.256	332.839			11	33	216.504	358.531
	9	29	269.331	341.692			11	34	215.927	367.191
	9	30	267.792	352.854			11	35	217.659	373.542
	9	31	264.712	364.978			11	36	217.082	378.161
	9	32	260.864	377.68			11	37	215.927	383.934
	9	33	258.939	391.921			11	38	217.659	388.553
	9	34	256.245	404.622			11	39	217.082	396.058
	9	35	255.09	418.863			12	1	260.382	82.56
	9	36	252.396	431.565			12	2	258.65	89.488
	9	37	250.086	443.497			12	3	258.65	92.375
	9	38	250.086	453.889			12	4	259.805	98.149
	9	39	248.547	463.896			12	5	257.496	103.345
	10	1	295.023	142.604			12	6	255.186	108.541
	10	2	294.446	151.842			12	7	255.186	115.469
	10	3	292.714	159.924			12	8	251.722	118.356
	10	4	292.714	168.007			12	9	251.145	125.861
	10	5	292.136	176.09			12	10	251.722	132.789
	10	6	293.868	183.596			12	11	251.145	135.099
	10	7	295.023	192.256			12	12	251.145	140.872
	10	8	293.291	198.607			12	13	249.99	148.378
	10	9	292.136	204.957			12	14	250.568	154.151
	10	10	293.002	214.291			12	15	251.722	159.347
	10	11	293.387	224.683			12	16	249.413	166.275
	10	12	290.693	227.378			12	17	249.413	174.358
	10	13	291.463	234.306			12	18	248.835	183.018
	10	14	293.002	239.309			12	19	249.413	191.101
	10	15	292.617	245.083			12	20	248.835	198.607
	10	16	291.463	249.702			12	21	247.681	206.689
	10	17	292.233	256.245			12	22	247.103	215.35
	10	18	292.617	263.173			12	23	249.413	225.742
	10	19	294.542	269.716			12	24	248.835	234.402
	10	20	294.927	277.029			12	25	245.949	244.794
	10	21	294.157	283.572			12	26	244.217	257.496
	10	22	294.542	290.885			12	27	243.639	267.311
	10	23	294.927	299.738			12	28	242.485	273.661
	10	24	294.157	306.281			12	29	243.062	276.548
	10	25	293.002	313.209			12	30	241.907	280.589
	10	26	293.772	322.062			12	31	238.443	290.404
	10	27	290.693	332.069			12	32	237.866	295.6
	10	28	286.844	339.382			12	33	238.443	301.951
	10	29	281.455	350.929			12	34	237.289	310.034
	10	30	277.606	363.246			12	35	236.711	315.807
	10	31	277.606	377.872			12	36	236.711	322.736
	10	32	275.682	388.649			12	37	237.289	330.241
	10	33	272.988	399.234			12	38	236.134	337.747
	10	34	268.754	410.781			12	39	234.979	345.252
	10	35	265.675	422.712			13	1	277.125	126.438
	10	36	262.98	432.72			13	2	277.125	132.212
	10	37	262.596	443.882			13	3	275.393	138.563
	10	38	261.441	455.429			13	4	274.816	146.646
	10	39	257.977	462.742			13	5	273.084	152.996
	11	1	299.161	133.078			13	6	274.239	158.192
	11	2	296.466	138.851			13	7	273.661	165.121
	11	3	293.772	145.01			13	8	269.043	170.894
	11	4	294.927	153.477			13	9	268.465	177.245
	11	5	293.772	158.481			13	10	268.465	184.75
	11	6	295.312	161.56			13	11	266.156	189.946
	11	7	295.697	166.564			13	12	264.424	195.72
	11	8	294.542	175.417			13	13	264.424	202.648
	11	9	294.927	182.345			13	14	265.001	208.999
	11	10	295.312	189.658			13	15	264.424	215.927
	11	11	296.082	198.51			13	16	265.001	221.123
	11	12	296.851	204.669			13	17	265.578	228.628
	11	13	298.006	210.442			13	18	265.578	239.021
	11	14	298.391	214.291			13	19	265.578	245.371
	11	15	300.315	220.064			13	20	265.001	254.032
	11	16	301.085	226.223			13	21	266.156	261.537
	11	17	301.085	232.381			13	22	263.269	270.775
	11	18	303.395	238.924			13	23	263.269	279.435
	11	19	304.934	245.468			13	24	259.805	286.94
	11	20	305.704	252.396			13	25	254.609	298.487
	11	21	305.704	259.324			13	26	252.877	308.302
	11	22	307.244	266.252			13	27	251.145	317.539
	11	23	307.244	275.874			13	28	247.103	325.045
	11	24	301.855	284.342			13	29	244.217	336.015
	11	25	297.236	294.349			13	30	241.907	346.407
	11	26	296.466	306.281			13	31	240.175	360.84
	11	27	295.312	316.289			13	32	240.175	369.501
	11	28	293.772	325.141			13	33	239.598	379.893
	11	29	290.308	336.303			13	34	236.711	389.13
	11	30	287.999	349.005			13	35	234.402	398.368
	11	31	287.999	363.053			13	36	234.402	408.183
	11	32	289.153	378.449			13	37	233.825	416.265
	11	33	287.999	389.996			13	38	233.247	426.658
	11	34	286.459	400.388			13	39	233.247	435.318
	11	35	283.38	412.32			14	1	295.6	129.325
	11	36	283.765	422.328			14	2	293.291	137.408
	11	37	283.38	433.874			14	3	292.714	142.027
	11	38	282.61	444.267			14	4	291.559	150.687
	11	39	280.686	455.814			14	5	289.827	155.883
	12	8	292.04	111.909			14	6	288.672	162.811
	12	9	292.04	117.682			14	7	288.095	170.317
	12	10	287.421	123.456			14	8	286.94	176.667
	12	11	284.342	131.153			14	9	285.208	181.286
	12	12	283.572	139.236			14	10	286.363	187.637
	12	13	283.572	147.319			14	11	285.208	194.565
	12	14	283.957	152.323			14	12	283.476	199.761
	12	15	284.342	158.866			14	13	284.054	203.225
	12	16	285.112	165.024			14	14	284.631	208.421
	12	17	286.652	171.952			14	15	284.054	214.195
	12	18	288.576	180.42			14	16	284.631	219.968
	12	19	288.576	187.733			14	17	284.631	225.164
	12	20	287.421	196.586			14	18	284.054	231.515
	12	21	291.27	201.974			14	19	284.631	238.443
	12	22	291.27	207.748			14	20	284.054	247.103
	12	23	291.27	212.367			14	21	282.899	256.341
	12	24	290.885	218.91			14	22	281.744	262.114
	12	25	293.195	224.298			14	23	280.589	270.197
	12	26	293.965	229.302			14	24	277.703	280.589
	12	27	294.927	236.038			14	25	273.661	288.672
	12	28	292.617	241.426			14	26	269.62	293.291
	12	29	292.233	249.124			14	27	267.888	302.529
	12	30	289.538	259.901			14	28	265.578	311.766
	12	31	286.459	266.445			14	29	262.692	319.849
	12	32	281.455	276.452			14	30	262.692	334.282
	12	33	277.606	287.614			14	31	261.537	346.407
	12	34	272.218	299.546			14	32	261.537	359.108
	12	35	270.678	310.323			14	33	261.537	369.501
	12	36	267.984	320.33			14	34	259.228	378.161
	12	37	262.98	331.877			14	35	254.609	390.862
	12	38	259.131	344.578			14	36	254.032	401.832
	12	39	257.977	360.359			14	37	252.3	413.379
	12	1	253.743	372.676			14	38	250.568	423.771
	12	2	251.818	385.377			14	39	247.681	430.699
	12	3	250.279	397.309			15	1	309.457	125.284
	12	4	249.124	406.162			15	2	308.302	131.057
	12	5	250.279	418.863			15	3	307.147	139.14
	12	6	249.509	431.565			15	4	305.415	146.646
	12	7	247.2	442.727			15	5	304.261	152.996
	13	1	311.477	114.795			15	6	304.261	161.656
	13	2	308.783	121.723			15	7	302.529	170.317
	13	3	306.474	127.497			15	8	300.219	176.09
	13	4	304.934	133.27			15	9	297.332	182.441
	13	5	302.625	136.35			15	10	298.487	188.214
	13	6	303.779	141.353			15	11	298.487	194.565
	13	7	304.934	144.432			15	12	298.487	198.607
	13	8	303.01	149.051			15	13	299.064	205.535
	13	9	302.625	155.594			15	14	299.064	211.308
	13	10	300.7	161.368			15	15	298.487	216.504
	13	11	302.625	170.22			15	16	299.064	221.7
	13	12	300.315	177.149			15	17	299.642	226.896
	13	13	301.085	183.307			15	18	300.219	234.402
	13	14	302.432	188.118			15	19	300.797	241.907
	13	15	302.432	193.892			15	20	298.487	250.568
	13	16	301.663	198.51			15	21	300.219	255.186
	13	17	303.972	205.438			15	22	299.064	265.578
	13	18	306.666	210.057			15	23	298.487	271.929
	13	19	307.821	212.367			15	24	298.487	282.899
	13	20	305.127	219.295			15	25	294.446	290.982
	13	21	302.047	227.378			15	26	293.868	301.374
	13	22	303.202	237.77			15	27	288.672	307.147
	13	23	303.587	248.547			15	28	289.827	315.807
	13	24	302.432	257.399			15	29	284.631	326.2
	13	25	296.659	268.561			15	30	282.321	337.169
	13	26	293.195	284.342			15	31	280.012	349.293
	13	27	289.731	298.198			15	32	277.703	364.882
	13	28	289.731	310.13			15	33	275.971	375.851
	13	29	285.497	322.832			15	34	273.084	386.243
	13	30	280.878	335.918			15	35	270.197	396.636
	13	31	273.565	348.812			15	36	268.465	405.296
	13	32	270.101	361.899			15	37	265.578	416.265
	13	33	269.524	376.91			15	38	263.846	429.544
	13	34	267.599	390.381			15	39	262.692	439.937
	13	35	261.056	402.698			16	1	322.736	142.604
	131	1	248.739	413.86			16	2	321.581	149.532
	131	2	247.969	425.407			16	3	320.426	155.306
	131	3	244.505	435.414			16	4	318.694	165.698
	131	4	240.656	445.806			16	5	318.117	172.626
	132	1	266.829	416.169			16	6	315.807	180.131
	132	2	266.829	426.946			16	7	314.653	187.06
	132	3	263.365	436.954			16	8	313.498	194.565
	132	4	260.671	446.961			16	9	311.766	200.339
	14	1	307.628	144.625			16	10	311.189	211.308
	14	2	306.474	150.783			16	11	310.034	221.7
	14	3	303.779	156.941			16	12	307.725	229.206
	14	4	303.01	162.715			16	13	306.57	238.443
	14	5	302.625	170.028			16	14	307.147	245.371
	14	6	303.395	173.107			16	15	307.147	252.877
	14	7	303.395	176.186			16	16	306.57	261.537
	14	8	303.01	183.114			16	17	306.57	269.62
	14	9	302.24	189.658			16	18	305.415	280.012
	14	10	301.085	199.28			16	19	305.415	285.208
	14	11	300.7	209.672			16	20	305.415	295.6
	14	12	299.546	219.295			16	21	304.838	303.106
	14	13	300.315	224.683			16	22	302.529	311.766
	14	14	300.7	227.762			16	23	301.374	323.313
	14	15	300.123	233.921			16	24	297.91	331.396
	14	16	299.738	240.464			16	25	294.446	341.211
	14	17	299.353	245.853			16	26	292.136	351.025
	14	18	299.738	252.011			16	27	289.827	359.108
	14	19	302.432	259.709			16	28	286.363	369.501
	14	20	301.278	266.252			16	29	284.054	378.161
	14	21	300.508	273.565			16	30	280.012	390.285
	14	22	300.893	280.108			16	31	277.125	404.141
	14	23	300.893	288.961			16	32	275.393	413.379
	14	24	298.198	296.274			16	33	273.661	423.194
	14	25	295.504	305.511			16	34	269.043	434.74
	14	26	293.195	314.749			16	35	267.888	443.978
	14	27	288.576	321.292			16	36	263.846	454.37
	14	28	282.418	325.911			16	37	260.382	464.762
	14	29	275.49	333.994			16	38	262.114	473.423
	14	30	273.565	345.926			16	39	261.537	483.237
	14	31	271.256	358.242			17	1	303.106	88.334
	14	32	267.407	370.944			17	2	303.683	95.262
	14	33	263.173	382.876			17	3	300.797	101.035
	14	34	261.248	397.117			17	4	299.064	106.809
	14	35	257.784	408.664			17	5	296.755	113.16
	14	36	255.09	419.826			17	6	295.6	120.088
	14	37	250.856	430.603			17	7	291.559	125.284
	14	38	248.932	441.38			17	8	291.559	132.212
	14	39	245.468	451.387			17	9	288.672	140.295
	15	1	323.987	92.086			17	10	289.25	144.913
	15	2	321.292	97.86			17	11	288.672	151.842
	15	3	320.522	103.633			17	12	288.672	156.46
	15	4	318.213	110.177			17	13	287.518	165.121
	15	5	316.289	111.716			17	14	286.94	170.317
	15	6	312.825	117.875			17	15	285.786	174.358
	15	7	311.67	121.723			17	16	284.631	179.554
	15	8	307.436	127.882			17	17	283.476	185.328
	15	9	305.127	133.655			17	18	280.589	192.256
	15	10	306.281	138.659			17	19	280.589	201.493
	15	11	308.591	145.202			17	20	280.589	206.689
	15	12	309.745	152.13			17	21	279.435	216.504
	15	13	310.9	161.368			17	22	279.435	222.278
	15	14	310.13	166.756			17	23	279.435	231.515
	15	15	308.976	171.375			17	24	276.548	239.021
	15	16	311.285	178.303			17	25	273.661	248.258
	15	17	312.055	185.616			17	26	270.197	257.496
	15	18	311.285	192.929			17	27	267.311	267.888
	15	19	310.9	201.012			17	28	265.578	274.239
	15	20	310.515	210.635			17	29	264.424	280.012
	15	21	310.13	221.027			17	30	263.846	286.363
	15	22	308.206	232.189			17	31	263.269	293.868
	15	23	308.976	242.196			17	32	262.692	304.261
	15	24	304.357	252.203			17	33	262.692	313.498
	15	25	300.508	264.135			17	34	260.382	320.426
	15	26	298.583	278.376			17	35	261.537	328.509
	15	27	295.889	291.463			17	36	259.228	336.015
	15	28	291.655	302.625			17	37	258.073	344.097
	15	29	290.116	315.326			17	38	257.496	352.758
	15	30	286.652	329.183			17	39	256.918	361.418
	15	31	284.342	345.733			18	1	295.023	72.745
	151	1	274.72	356.125			18	2	290.404	79.096
	151	2	268.754	368.634			18	3	292.136	81.983
	151	3	262.211	383.261			18	4	290.982	86.602
	151	4	257.592	397.502			18	5	287.518	91.798
	151	5	253.358	409.818			18	6	289.25	96.994
	151	6	249.894	421.365			18	7	286.363	102.767
	151	7	246.045	430.603			18	8	283.476	107.963
	151	8	243.736	441.765			18	9	283.476	113.737
	152	1	286.652	366.325			18	10	282.321	119.51
	152	2	283.187	379.412			18	11	283.476	124.129
	152	3	280.108	390.958			18	12	284.054	128.748
	152	4	276.644	402.12			18	13	282.899	135.099
	152	5	273.95	413.667			18	14	283.476	142.027
	152	6	274.72	425.599			18	15	282.899	147.8
	152	7	272.795	434.837			18	16	282.321	152.996
	152	8	270.486	447.153			18	17	282.899	158.192
	16	1	321.485	136.734			18	18	281.167	165.698
	16	2	319.945	144.817			18	19	281.167	172.626
	16	3	316.481	151.36			18	20	280.012	180.131
	16	4	314.941	158.674			18	21	279.435	185.905
	16	5	315.711	164.832			18	22	278.857	192.256
	16	6	313.402	172.145			18	23	280.589	198.029
	16	7	313.787	179.458			18	24	280.589	203.803
	16	8	311.477	185.231			18	25	277.703	210.731
	16	9	311.092	191.005			18	26	274.816	218.814
	16	10	310.708	201.397			18	27	275.393	229.206
	16	11	311.092	211.404			18	28	274.239	234.979
	16	12	310.708	217.948			18	29	269.62	239.598
	16	13	310.708	224.876			18	30	269.043	246.526
	16	14	310.708	232.189			18	31	266.733	255.186
	16	15	309.553	239.887			18	32	266.156	264.424
	16	16	308.783	247.585			18	33	265.578	270.775
	16	17	307.244	257.977			18	34	265.578	278.28
	16	18	306.859	266.829			18	35	263.846	285.786
	16	19	311.862	270.678			18	36	263.269	291.559
	16	20	311.862	276.837			18	37	262.692	297.91
	16	21	312.247	284.535			18	38	260.96	303.106
	16	22	311.477	293.002			18	39	260.96	309.457
	16	23	311.477	299.546			19	1	276.548	57.157
	16	24	309.168	306.859			19	2	275.971	64.085
	16	25	306.089	313.787			19	3	275.393	66.972
	16	26	304.549	320.33			19	4	274.239	72.168
	16	27	302.24	328.413			19	5	273.084	76.209
	16	28	298.006	336.881			19	6	271.352	80.828
	16	29	294.927	348.043			19	7	269.62	89.488
	16	30	289.923	360.359			19	8	268.465	95.262
	16	31	287.614	374.985			19	9	269.62	100.458
	16	32	286.074	389.611			19	10	268.465	107.963
	161	1	279.916	405.392			19	11	268.465	110.85
	161	2	273.758	416.939			19	12	270.197	114.314
	161	3	269.909	430.025			19	13	270.775	120.088
	161	4	266.829	442.727			19	14	271.352	124.129
	161	5	266.06	455.044			19	15	269.62	126.438
	161	6	262.211	462.357			19	16	268.465	127.593
	161	7	257.592	469.285			19	17	269.043	131.635
	162	1	287.999	396.155			19	18	270.775	136.831
	162	2	286.844	406.162			19	19	271.929	141.449
	162	3	282.225	419.633			19	20	271.929	147.8
	162	4	277.991	431.18			19	21	273.084	154.151
	162	5	273.758	440.803			19	22	271.929	159.924
	162	6	270.678	450.425			19	23	274.239	166.275
	162	7	267.214	461.587			19	24	274.239	174.358
	3	17	325.526	120.376			19	25	273.661	181.286
	3	18	322.447	126.535			19	26	271.929	190.524
	3	19	320.907	133.463			19	27	270.775	199.184
	3	20	320.138	142.7			19	28	267.311	203.225
	3	21	320.522	148.474			19	29	265.001	211.885
	3	22	321.292	154.632			19	30	264.424	219.391
	3	23	320.907	157.326			19	31	264.424	226.319
	3	24	318.213	160.021			19	32	264.424	231.515
	3	25	315.904	166.949			19	33	265.001	240.753
	3	26	317.828	176.956			19	34	265.001	245.949
	3	27	318.598	186.194			19	35	265.578	248.835
	3	28	319.368	192.737			19	36	267.311	254.032
	3	29	319.368	196.971			19	37	265.578	259.805
	3	30	321.677	203.514			19	38	266.156	262.692
	3	31	319.753	210.442			19	39	267.311	267.311
	3	32	318.983	218.525			20	1	324.468	86.602
	3	33	319.368	226.608			20	2	322.736	90.643
	3	34	318.983	231.996			20	3	319.272	91.798
	3	35	318.983	237			20	4	319.272	99.303
	3	36	320.907	246.237			20	5	318.117	109.118
	3	37	319.368	253.935			20	6	316.385	114.892
	3	38	317.443	263.365			20	7	314.653	120.665
	3	39	318.983	273.373			20	8	313.498	125.284
	3	1	312.825	280.301			20	9	313.498	129.903
	3	2	307.051	289.153			20	10	312.343	133.367
	3	3	303.202	299.161			20	11	313.498	139.14
	3	4	297.044	308.013			20	12	313.498	144.913
	3	5	289.346	317.251			20	13	313.498	152.996
	3	6	283.957	327.258			20	14	313.498	157.038
	3	7	280.108	336.111			20	15	311.189	162.811
	3	8	275.105	350.737			20	16	311.189	169.162
	3	9	274.72	363.823			20	17	310.611	176.09
	3	10	272.026	376.525			20	18	310.611	184.173
	3	11	269.331	390.381			20	19	313.498	193.41
	3	12	266.252	402.313			20	20	312.921	198.607
	3	13	264.328	414.63			20	21	310.034	202.071
	3	14	263.173	427.331			20	22	308.879	208.999
	3	15	260.479	439.648			20	23	307.725	217.082
	3	16	257.784	450.81			20	24	309.457	222.278
	18	1	333.032	134.233			20	25	308.302	228.628
	18	2	331.877	138.851			20	26	308.302	236.134
	18	3	330.337	146.934			20	27	308.302	243.639
	18	4	327.643	154.247			20	28	305.415	249.99
	18	5	326.873	160.406			20	29	303.106	254.609
	18	6	326.488	167.334			20	30	300.797	261.537
	18	7	324.564	172.722			20	31	298.487	271.929
	18	8	323.024	178.496			20	32	296.755	281.167
	18	9	321.1	186.579			20	33	295.6	290.982
	18	10	320.715	195.431			20	34	294.446	299.064
	18	11	322.254	203.514			20	35	292.136	307.725
	18	12	320.715	210.057			20	36	290.982	314.075
	18	13	321.87	218.525			20	37	288.672	321.004
	18	14	319.56	225.453			20	38	290.404	327.932
	18	15	318.406	233.536			20	39	288.672	337.169
	18	16	317.251	240.849			21	1	313.498	73.323
	18	17	318.406	247.777			21	2	311.766	77.364
	18	18	319.175	257.784			21	3	310.034	83.715
	18	19	321.485	262.403			21	4	306.57	91.798
	18	20	322.254	270.101			21	5	305.993	95.839
	18	21	320.715	278.954			21	6	305.993	102.19
	18	22	320.715	286.267			21	7	305.415	104.499
	18	23	320.33	297.429			21	8	302.529	112.582
	18	24	316.866	304.357			21	9	301.951	116.624
	18	25	314.172	313.209			21	10	302.529	120.088
	18	26	312.632	323.602			21	11	302.529	127.016
	18	27	311.092	333.609			21	12	300.219	134.521
	18	28	307.628	343.231			21	13	300.219	138.563
	18	29	305.319	355.548			21	14	301.374	146.646
	18	30	303.01	367.095			21	15	298.487	154.151
	18	31	304.164	380.566			21	16	297.332	161.656
	18	32	303.01	392.113			21	17	296.178	169.162
	18	33	300.315	404.815			21	18	295.6	174.935
	18	34	295.119	415.977			21	19	296.178	181.286
	18	35	291.655	425.599			21	20	296.755	188.214
	18	36	287.806	435.222			21	21	295.023	195.142
	18	37	282.803	444.844			21	22	295.023	198.029
	18	38	278.954	454.081			21	23	295.023	199.184
	18	39	275.49	463.319			21	24	296.178	204.957
	19	1	338.42	145.587			21	25	296.178	209.576
	19	2	334.571	151.36			21	26	295.023	217.659
	19	3	331.877	160.598			21	27	295.023	228.628
	19	4	329.952	168.296			21	28	293.868	233.825
	19	5	330.337	174.454			21	29	290.404	238.443
	19	6	328.413	182.922			21	30	286.363	245.371
	19	7	327.643	191.005			21	31	282.321	255.186
	19	8	324.949	196.778			21	32	282.321	266.156
	19	9	322.639	204.861			21	33	283.476	274.239
	19	10	321.87	213.714			21	34	283.476	280.589
	19	11	322.254	221.797			21	35	281.744	288.672
	19	12	320.715	230.264			21	36	281.167	292.714
	19	13	319.56	237.577			21	37	280.012	302.529
	19	14	318.406	246.045			21	38	280.012	308.879
	19	15	316.096	252.973			21	39	277.703	317.539
	19	16	315.326	257.592			22	1	338.324	94.107
	19	17	314.557	265.29			22	2	338.324	101.035
	19	18	315.711	273.373			22	3	335.437	104.499
	191	1	311.285	281.648			22	4	333.705	109.695
	191	2	312.44	287.421			22	5	331.396	115.469
	191	3	308.976	292.425			22	6	331.973	121.242
	191	4	305.511	300.123			22	7	329.664	128.17
	191	5	304.357	309.36			22	8	329.664	131.635
	191	6	301.663	318.213			22	9	330.241	136.253
	191	7	298.198	323.987			22	10	328.509	143.759
	191	8	298.583	334.764			22	11	327.354	150.11
	191	9	296.659	343.616			22	12	327.932	156.46
	191	10	290.501	351.699			22	13	329.664	164.543
	191	11	288.191	361.321			22	14	329.664	169.739
	191	12	283.572	372.483			22	15	329.664	177.822
	191	13	280.108	385.57			22	16	329.664	182.441
	191	14	275.105	398.656			22	17	329.086	189.946
	191	15	272.026	408.664			22	18	329.086	197.452
	191	16	265.867	419.826			22	19	329.664	207.267
	191	17	262.596	431.565			22	20	329.664	213.04
	191	18	261.441	440.418			22	21	328.509	218.814
	191	19	261.056	453.504			22	22	326.777	226.319
	191	20	260.671	463.127			22	23	325.622	237.866
	191	21	260.286	473.904			22	24	321.004	245.949
	192	1	325.719	275.874			22	25	316.962	254.032
	192	2	327.643	283.572			22	26	315.807	262.114
	192	3	325.334	290.885			22	27	317.539	266.156
	192	4	321.485	298.583			22	28	317.539	269.62
	192	5	321.485	307.436			22	29	318.117	277.125
	192	6	319.56	313.594			22	30	316.962	284.631
	192	7	318.406	320.907			22	31	315.23	292.136
	192	8	319.945	330.145			22	32	315.23	303.106
	192	9	318.021	340.922			22	33	312.343	311.766
	192	10	315.326	349.775			22	34	311.189	321.004
	192	11	312.632	362.091			22	35	308.302	331.973
	192	12	309.938	373.638			22	36	308.302	340.633
	192	13	310.708	387.687			22	37	305.415	349.871
	192	14	311.092	399.234			22	38	304.261	357.376
	192	15	310.323	410.011			22	39	303.683	364.882
	192	16	306.089	418.479			23	1	347.561	120.088
	192	17	298.776	430.025			23	2	347.561	125.284
	192	18	295.312	441.187			23	3	343.52	131.057
	192	19	290.693	451.58			23	4	340.056	137.985
	192	20	286.844	460.817			23	5	339.479	143.181
	192	21	283.765	470.44			23	6	337.747	152.996
	20	1	343.231	127.497			23	7	336.592	159.924
	20	2	343.616	134.425			23	8	334.282	166.275
	20	3	340.152	141.353			23	9	333.128	173.203
	20	4	337.458	147.127			23	10	333.128	179.554
	20	5	336.303	155.979			23	11	330.818	185.905
	20	6	335.533	161.753			23	12	332.55	193.41
	20	7	332.839	169.451			23	13	330.818	199.761
	20	8	330.145	174.839			23	14	328.509	206.689
	20	9	329.76	184.846			23	15	327.932	213.617
	20	10	329.375	192.16			23	16	327.932	220.546
	20	11	330.915	198.318			23	17	327.354	228.051
	20	12	330.53	204.861			23	18	329.086	233.247
	20	13	330.915	214.483			23	19	329.664	237.866
	20	14	332.069	220.064			23	20	330.241	244.217
	20	15	331.3	228.917			23	21	328.509	251.145
	20	16	330.53	238.155			23	22	327.932	258.65
	20	17	329.76	246.237			23	23	325.622	269.62
	20	18	330.145	251.241			23	24	322.158	276.548
	20	19	329.76	254.32			23	25	319.272	284.631
	20	20	329.76	262.403			23	26	318.694	295.023
	20	21	330.915	268.561			23	27	314.653	305.993
	20	22	330.53	276.644			23	28	310.611	318.117
	20	23	330.915	285.882			23	29	306.57	325.622
	20	24	327.066	294.734			23	30	303.683	337.747
	20	25	323.217	305.127			23	31	300.797	351.603
	20	26	319.368	315.519			23	32	299.642	363.727
	20	27	317.443	327.835			23	33	296.755	375.274
	20	28	312.825	339.382			23	34	294.446	385.089
	20	29	308.976	350.544			23	35	290.404	396.058
	201	1	313.402	364.401			23	36	285.786	405.296
	201	2	311.092	378.257			23	37	282.321	417.42
	201	3	310.708	390.574			23	38	281.744	429.544
	201	4	310.708	402.12			23	39	280.012	438.205
	201	5	306.089	412.898			24	1	365.459	124.129
	201	6	299.93	423.675			24	2	363.727	129.903
	201	7	295.697	435.222			24	3	361.418	133.367
	201	8	293.002	446.768			24	4	358.531	138.563
	201	9	291.078	457.161			24	5	358.531	144.336
	201	10	289.153	467.938			24	6	356.799	151.264
	202	1	296.851	362.861			24	7	354.49	158.77
	202	2	295.312	377.872			24	8	353.912	165.121
	202	3	291.848	390.189			24	9	352.758	172.049
	202	4	287.229	402.12			24	10	351.603	176.09
	202	5	282.61	412.513			24	11	352.758	181.864
	202	6	276.452	425.214			24	12	351.025	189.946
	202	7	272.218	436.376			24	13	350.448	200.339
	202	8	271.833	447.153			24	14	349.871	207.844
	202	9	267.599	459.47			24	15	351.603	212.463
	202	10	266.06	468.708			24	16	351.603	217.082
	21	1	352.661	100.939			24	17	352.758	224.01
	21	2	350.737	105.558			24	18	351.025	231.515
	21	3	348.043	108.252			24	19	355.067	237.289
	21	4	344.578	110.946			24	20	356.222	245.371
	21	5	344.578	114.795			24	21	355.644	250.568
	21	6	341.499	119.414			24	22	355.644	262.114
	21	7	338.805	123.263			24	23	354.49	272.507
	21	8	335.341	127.882			24	24	353.335	278.28
	21	9	332.647	137.504			24	25	348.716	286.94
	21	10	330.722	142.508			24	26	346.407	298.487
	21	11	328.798	149.051			24	27	342.365	309.457
	21	12	329.952	156.364			24	28	337.747	318.117
	21	13	329.952	165.217			24	29	332.55	328.509
	21	14	333.032	174.069			24	30	327.932	337.747
	21	15	329.952	181.767			24	31	325.045	349.871
	21	16	327.643	189.85			24	32	321.004	359.686
	21	17	330.337	197.933			24	33	321.004	369.501
	21	18	329.183	204.861			24	34	321.004	378.161
	21	19	331.107	212.174			24	35	319.272	384.511
	21	20	331.107	220.257			24	36	316.385	392.017
	21	21	329.952	229.687			24	37	315.807	399.522
	21	22	330.722	242.388			24	38	313.498	405.873
	21	23	331.877	254.32			24	39	311.189	415.111
	21	24	331.107	265.097			25	1	376.429	140.872
	21	25	324.564	278.184			25	2	372.965	148.955
	21	26	323.409	293.58			25	3	370.078	155.883
	21	27	319.175	306.666			25	4	367.768	161.079
	21	28	311.092	316.673			25	5	366.036	168.585
	21	29	304.934	327.835			25	6	364.882	176.667
	21	30	298.391	338.997			25	7	363.15	184.173
	21	31	293.002	353.239			25	8	360.84	189.946
	21	32	290.501	368.25			25	9	356.799	199.761
	21	33	285.112	380.181			25	10	356.222	207.844
	21	34	280.493	391.343			25	11	352.758	215.35
	21	35	275.105	401.351			25	12	352.18	223.432
	21	36	270.871	410.973			25	13	353.335	229.206
	21	37	267.407	422.905			25	14	352.18	240.175
	21	38	264.712	432.527			25	15	352.758	247.681
	21	39	263.943	444.074			25	16	349.871	258.073
	22	1	369.404	109.792			25	17	350.448	266.156
	22	2	365.94	118.644			25	18	348.716	273.084
	22	3	363.246	125.572			25	19	348.139	282.321
	22	4	362.091	131.731			25	20	345.252	288.672
	22	5	363.246	139.814			25	21	344.675	298.487
	22	6	359.782	146.742			25	22	342.943	307.147
	22	7	357.472	152.9			25	23	339.479	319.272
	22	8	354.393	159.058			25	24	336.592	328.509
	22	9	352.084	167.141			25	25	330.818	334.86
	22	10	349.39	179.843			25	26	330.818	344.675
	221	1	349.775	177.918			25	27	325.622	356.799
	221	2	347.08	184.077			25	28	322.736	364.882
	221	3	347.465	194.854			25	29	318.694	374.119
	221	4	346.31	202.552			25	30	314.653	383.934
	221	5	340.537	209.095			25	31	312.343	398.368
	221	6	339.382	217.563			25	32	310.611	408.183
	221	7	340.537	226.415			25	33	308.302	419.729
	221	8	341.692	232.959			25	34	303.106	428.967
	221	9	342.462	237.962			25	35	299.064	440.514
	221	10	342.846	247.585			25	36	296.755	450.329
	221	11	342.077	254.898			25	37	294.446	459.566
	221	12	339.382	263.75			25	38	292.136	471.69
	221	13	338.613	272.218			25	39	290.982	479.773
	221	14	334.379	281.455			26	1	398.368	129.903
	221	15	329.76	293.002			26	2	396.636	137.985
	221	16	327.835	305.319			26	3	392.017	143.759
	221	17	327.451	318.406			26	4	388.553	153.574
	221	18	324.756	329.183			26	5	387.976	158.192
	221	19	322.062	336.881			26	6	386.243	166.275
	221	20	318.213	349.197			26	7	385.666	172.626
	221	21	319.753	364.208			26	8	383.934	178.399
	221	22	316.673	378.834			26	9	383.934	185.905
	221	23	313.594	391.536			26	10	381.625	193.988
	221	24	308.206	402.698			26	11	380.47	199.761
	221	25	301.663	413.09			26	12	379.893	206.689
	221	26	298.583	423.097			26	13	380.47	215.35
	221	27	295.119	434.259			26	14	379.315	224.01
	221	28	291.27	443.497			26	15	378.161	234.979
	221	29	287.421	453.119			26	16	377.583	241.33
	222	1	348.043	196.971			26	17	378.161	249.413
	222	2	348.812	204.669			26	18	379.315	256.918
	222	3	347.658	211.982			26	19	378.738	266.156
	222	4	345.733	220.064			26	20	378.161	273.661
	222	5	343.039	224.683			26	21	378.738	281.744
	222	6	339.96	230.457			26	22	378.161	292.136
	222	7	338.035	236.615			26	23	375.274	300.797
	222	8	333.801	235.46			26	24	372.965	311.189
	222	9	332.262	238.924			26	25	370.078	318.117
	222	10	331.877	250.856			26	26	368.346	328.509
	222	11	330.337	257.784			26	27	364.882	338.901
	222	12	330.337	267.407			26	28	361.418	349.293
	222	13	330.722	275.874			26	29	357.376	357.376
	222	14	325.719	284.727			26	30	352.18	370.078
	222	15	320.715	293.965			26	31	346.407	383.357
	222	16	318.406	306.666			26	32	344.675	392.594
	222	17	315.326	318.598			26	33	341.211	403.564
	222	18	311.477	327.451			26	34	335.437	415.111
	222	19	306.474	338.228			26	35	330.818	424.926
	222	20	301.663	351.314			26	36	328.509	434.74
	222	21	298.198	367.865			26	37	325.622	443.401
	222	22	295.504	380.566			26	38	323.313	450.906
	222	23	290.501	391.728			26	39	319.849	458.412
	222	24	283.572	401.736			27	1	414.533	124.129
	222	25	277.799	414.052			27	2	412.801	133.367
	222	26	273.565	426.369			27	3	410.492	138.563
	222	27	270.871	435.991			27	4	408.76	144.336
	222	28	266.252	447.923			27	5	408.76	151.842
	222	29	262.018	456.968			27	6	408.183	159.924
	23	1	360.937	92.086			27	7	406.451	168.585
	23	2	357.857	97.475			27	8	404.719	175.513
	23	3	355.163	100.939			27	9	404.141	182.441
	23	4	353.624	105.943			27	10	402.986	188.792
	23	5	352.084	112.871			27	11	401.254	198.029
	23	6	348.62	118.644			27	12	400.677	203.803
	23	7	345.926	124.033			27	13	400.677	211.308
	23	8	342.462	129.037			27	14	401.254	219.968
	23	9	339.382	135.195			27	15	400.677	227.474
	23	10	337.073	140.968			27	16	399.522	235.557
	23	11	336.688	146.742			27	17	399.522	243.639
	23	12	337.843	152.9			27	18	400.677	250.568
	23	13	339.767	161.368			27	19	401.254	260.382
	23	14	340.922	168.681			27	20	401.832	268.465
	23	15	338.613	175.224			27	21	401.832	278.857
	23	16	340.537	182.152			27	22	399.522	286.94
	23	17	339.382	191.005			27	23	400.1	295.023
	23	18	338.997	198.318			27	24	398.945	306.57
	23	19	341.692	206.401			27	25	397.79	318.117
	23	20	344.001	215.638			27	26	396.636	332.55
	23	21	345.156	225.261			27	27	390.862	344.097
	23	22	345.926	236.038			27	28	387.976	354.49
	23	23	347.08	249.509			27	29	382.779	364.882
	23	24	345.348	263.173			27	30	377.583	374.119
	23	25	342.654	277.799			27	31	374.119	386.243
	23	26	340.73	293.195			27	32	369.501	397.213
	23	27	336.881	305.127			27	33	367.768	407.028
	23	28	332.262	316.673			27	34	360.263	415.111
	23	29	324.371	328.22			27	35	359.108	424.348
	23	30	318.213	340.922			27	36	357.376	431.276
	23	31	311.67	356.703			27	37	360.84	439.359
	23	32	310.9	370.174			27	38	360.84	442.823
	23	33	307.821	384.03			27	39	359.686	445.71
	23	34	303.587	397.117			28	1	414.533	155.883
	23	35	298.198	407.124			28	2	411.069	164.543
	23	36	299.353	420.595			28	3	405.873	173.203
	23	37	298.198	434.837			28	4	402.986	180.131
	23	38	297.814	447.153			28	5	401.254	187.06
	23	39	293.58	457.93			28	6	398.368	194.565
	24	1	371.906	97.283			28	7	396.636	202.648
	24	2	369.982	104.596			28	8	393.172	212.463
	24	3	365.363	109.214			28	9	389.13	219.968
	24	4	363.053	109.599			28	10	386.821	228.051
	24	5	362.284	116.527			28	11	385.089	235.557
	24	6	358.435	124.61			28	12	382.202	244.217
	24	7	356.125	128.074			28	13	382.202	250.568
	24	8	353.046	131.923			28	14	382.779	260.382
	24	9	350.352	137.697			28	15	382.202	270.197
	24	10	347.273	142.7			28	16	381.047	276.548
	24	11	347.273	147.704			28	17	379.893	285.208
	24	12	347.658	154.247			28	18	379.315	292.714
	24	13	348.043	161.175			28	19	377.583	300.219
	24	14	348.812	169.258			28	20	376.429	311.766
	24	15	346.118	176.186			28	21	374.119	318.117
	24	16	346.888	185.424			28	22	370.655	330.241
	24	17	346.118	192.737			28	23	368.923	340.633
	24	18	343.809	198.895			28	24	364.304	348.139
	24	19	345.733	206.593			28	25	358.531	356.222
	24	20	344.963	215.446			28	26	356.799	369.501
	24	21	341.884	223.913			28	27	351.603	379.315
	24	22	343.424	235.845			28	28	348.139	388.553
	24	23	343.809	248.932			28	29	342.365	397.79
	24	24	339.19	260.479			28	30	337.169	409.337
	24	25	336.111	273.95			28	31	333.128	419.729
	24	26	334.571	289.731			28	32	329.086	430.699
	24	27	328.798	302.817			28	33	324.468	439.359
	24	28	326.873	315.519			28	34	318.117	449.751
	24	29	320.715	327.835			28	35	315.23	459.566
	24	30	313.017	339.767			28	36	308.879	468.804
	24	31	304.742	353.239			28	37	304.838	476.887
	24	32	300.123	365.17			28	38	303.683	487.856
	24	33	295.119	376.332			28	39	300.797	497.671
	24	34	289.731	387.879			29	1	426.08	147.223
	24	35	283.187	399.041			29	2	422.616	158.192
	24	36	278.954	408.664			29	3	417.997	164.543
	24	37	275.874	420.211			29	4	415.688	171.471
	24	38	274.335	430.218			29	5	413.379	179.554
	24	39	271.641	442.535			29	6	411.069	188.214
	25	1	386.532	99.592			29	7	408.183	194.565
	25	2	383.453	103.826			29	8	405.296	203.803
	25	3	379.989	108.829			29	9	403.564	213.617
	25	4	374.985	113.833			29	10	400.677	221.123
	25	5	371.136	118.837			29	11	399.522	228.628
	25	6	369.597	126.535			29	12	398.368	239.598
	25	7	366.518	131.923			29	13	394.904	245.949
	25	8	365.748	134.618			29	14	396.058	254.609
	25	9	365.363	138.082			29	15	396.058	262.114
	25	10	362.284	143.47			29	16	394.904	270.775
	25	11	362.284	149.628			29	17	395.481	279.435
	25	12	361.514	158.481			29	18	393.749	288.672
	25	13	363.053	166.949			29	19	392.017	296.755
	25	14	364.978	174.262			29	20	392.017	306.57
	25	15	363.053	179.265			29	21	389.13	315.23
	25	16	362.669	186.194			29	22	386.821	326.2
	25	17	363.823	194.661			29	23	386.243	340.056
	25	18	363.053	202.744			29	24	381.047	346.984
	25	19	364.208	211.212			29	25	375.851	356.222
	25	20	366.518	220.064			29	26	373.542	367.191
	25	21	368.057	230.072			29	27	369.501	378.161
	25	22	366.518	242.004			29	28	364.304	389.13
	25	23	371.136	256.245			29	29	360.263	397.213
	25	24	371.136	270.486			29	30	355.644	407.605
	25	25	371.521	287.806			29	31	351.603	418.575
	25	26	371.521	303.587			29	32	346.984	429.544
	25	27	369.982	317.058			29	33	341.788	438.782
	25	28	366.133	330.145			29	34	336.015	449.751
	25	29	361.129	343.231			29	35	331.396	460.721
	25	30	357.28	359.012			29	36	327.354	467.649
	25	31	354.201	372.483			29	37	322.736	478.041
	25	32	349.967	382.491			29	38	322.158	487.856
	25	33	346.888	393.268			29	39	315.807	495.362
	25	34	342.654	404.815			30	1	456.102	169.162
	25	35	335.726	415.592			30	2	452.638	179.554
	25	36	330.337	426.369			30	3	449.174	187.06
	25	37	326.488	438.301			30	4	446.287	195.142
	25	38	323.024	449.078			30	5	444.555	202.648
	25	39	317.251	455.621			30	6	442.246	211.885
	26	1	357.088	120.761			30	7	439.359	219.391
	26	2	357.472	129.999			30	8	438.205	227.474
	26	3	354.008	135.002			30	9	436.472	236.711
	26	4	352.469	141.161			30	10	434.163	246.526
	26	5	351.699	144.24			30	11	430.699	254.032
	26	6	347.85	145.395			30	12	429.544	261.537
	26	7	345.541	152.323			30	13	427.235	271.352
	26	8	342.462	154.247			30	14	427.812	278.857
	26	9	340.537	158.481			30	15	425.503	289.25
	26	10	341.307	162.715			30	16	424.348	297.91
	26	11	341.307	168.488			30	17	422.616	306.57
	26	12	339.767	176.571			30	18	419.729	314.075
	26	13	344.001	181.575			30	19	420.307	323.313
	26	14	348.62	188.503			30	20	419.152	331.973
	26	15	347.85	194.661			30	21	416.265	342.365
	26	16	346.695	203.514			30	22	413.379	352.758
	26	17	348.235	209.672			30	23	413.956	367.191
	26	18	346.31	218.14			30	24	408.183	375.274
	26	19	344.771	225.453			30	25	403.564	385.666
	26	20	344.001	233.921			30	26	404.141	400.1
	26	21	344.386	244.313			30	27	399.522	408.76
	26	22	344.386	253.935			30	28	393.172	418.575
	261	1	335.918	265.867			30	29	390.285	427.812
	261	2	332.069	276.259			30	30	383.934	436.472
	261	3	329.375	285.497			30	31	380.47	448.597
	261	4	330.915	300.123			30	32	374.697	456.68
	261	5	328.605	311.67			30	33	371.233	465.34
	261	6	325.526	322.832			30	34	364.882	474.577
	261	7	320.907	335.533			30	35	359.686	482.083
	261	8	315.134	348.235			30	36	352.758	490.743
	261	9	309.745	361.706			30	37	348.716	498.248
	261	10	305.511	375.563			30	38	344.097	507.486
	261	11	301.278	387.11			31	1	401.832	84.87
	261	12	297.429	398.656			31	2	398.945	91.798
	261	13	290.885	409.818			31	3	397.213	98.726
	261	14	287.806	419.441			31	4	394.904	105.654
	261	15	285.112	430.603			31	5	392.594	110.273
	261	16	280.108	441.765			31	6	391.44	116.624
	261	17	278.569	451.387			31	7	392.017	121.82
	262	10	352.084	267.792			31	8	393.749	127.016
	262	11	348.235	282.418			31	9	391.44	133.367
	262	12	347.465	295.504			31	10	388.553	140.295
	262	13	349.39	308.591			31	11	386.821	146.068
	262	14	347.08	317.828			31	12	383.934	151.264
	262	15	345.926	327.451			31	13	385.666	158.77
	262	16	342.077	339.767			31	14	385.666	166.853
	262	17	338.613	353.239			31	15	385.666	173.203
	262	1	337.843	365.94			31	16	387.976	180.131
	262	2	333.224	377.872			31	17	386.821	190.524
	262	3	328.605	388.264			31	18	388.553	200.339
	262	4	324.371	398.272			31	19	390.862	210.153
	262	5	318.213	409.818			31	20	390.285	218.236
	262	6	313.979	420.595			31	21	390.285	226.896
	262	7	309.745	430.988			31	22	388.553	238.443
	262	8	304.742	439.84			31	23	388.553	247.681
	262	9	302.432	451.772			31	24	387.976	257.496
	27	1	355.74	135.58			31	25	388.553	263.269
	27	2	354.586	141.738			31	26	386.243	274.239
	27	3	351.891	149.821			31	27	389.708	280.589
	27	4	351.122	158.674			31	28	384.511	286.94
	27	5	350.737	163.677			31	29	379.893	293.868
	27	6	348.812	170.605			31	30	376.429	303.106
	27	7	349.967	174.454			31	31	371.81	311.766
	27	8	348.043	184.462			31	32	368.923	320.426
	27	9	348.427	193.699			31	33	366.036	329.664
	271	21	351.891	199.088			31	34	361.418	334.282
	271	22	349.197	206.786			31	35	360.84	341.788
	271	23	348.812	217.948			31	36	357.954	345.829
	271	24	343.424	225.645			31	37	354.49	352.758
	271	25	337.65	232.959			31	38	350.448	362.572
	271	26	339.575	239.887			31	39	349.293	370.078
	271	27	342.654	246.045			32	1	383.357	73.323
	271	28	344.963	250.279			32	2	382.202	77.364
	271	29	345.348	253.743			32	3	381.047	83.138
	271	30	345.348	259.516			32	4	378.738	89.488
	271	1	342.654	272.218			32	5	375.851	98.726
	271	2	340.152	278.954			32	6	373.542	105.654
	271	3	338.997	286.267			32	7	371.81	112.582
	271	4	338.997	297.044			32	8	370.655	118.933
	271	5	333.609	307.436			32	9	370.078	125.284
	271	6	327.066	319.753			32	10	368.923	129.325
	271	7	323.217	332.839			32	11	368.346	131.057
	271	8	316.673	344.001			32	12	366.036	138.563
	271	9	313.594	354.393			32	13	366.036	140.295
	271	10	309.745	365.17			32	14	367.768	141.449
	271	11	305.127	376.717			32	15	365.459	151.264
	271	12	305.127	391.728			32	16	365.459	157.615
	271	13	302.047	404.815			32	17	366.036	163.389
	271	14	301.663	417.516			32	18	369.501	165.121
	271	15	298.968	428.678			32	19	373.542	170.894
	271	16	295.889	438.686			32	20	376.429	177.822
	271	17	292.04	448.308			32	21	375.851	182.441
	271	18	295.119	461.01			32	22	375.851	190.524
	271	19	296.274	470.247			32	23	375.851	198.607
	271	20	296.659	479.1			32	24	378.161	210.153
	272	1	340.345	208.902			32	25	376.429	219.968
	272	2	337.65	217.755			32	26	376.429	230.938
	272	3	336.881	223.529			32	27	374.697	241.33
	272	4	336.881	233.536			32	28	372.387	252.3
	272	5	333.801	243.543			32	29	370.655	259.228
	272	6	331.107	251.626			32	30	367.191	266.156
	272	7	333.416	256.63			32	31	364.882	274.816
	272	8	335.341	261.248			32	32	364.304	278.857
	272	9	337.265	267.407			32	33	363.15	286.94
	272	10	338.805	272.026			32	34	360.263	294.446
	272	11	334.571	278.954			32	35	357.954	300.797
	272	12	331.107	285.112			32	36	357.376	307.147
	272	13	328.798	291.078			32	37	355.644	312.343
	272	14	325.719	299.93			32	38	354.49	317.539
	272	15	317.636	307.628			32	39	351.603	323.89
	272	16	313.017	314.941			33	1	356.799	70.436
	272	17	310.708	324.949			33	2	356.222	74.477
	272	18	306.089	334.186			33	3	356.222	76.209
	272	19	300.315	343.809			33	4	355.067	78.519
	272	20	296.082	354.971			33	5	355.067	87.756
	272	21	294.542	369.597			33	6	353.912	96.994
	272	22	292.617	384.223			33	7	352.758	101.613
	272	23	290.693	398.849			33	8	351.603	109.695
	272	24	289.538	413.86			33	9	353.335	114.892
	272	25	286.844	424.252			33	10	352.758	118.356
	272	26	282.995	437.338			33	11	351.603	123.552
	272	27	278.761	447.153			33	12	349.871	127.593
	272	28	275.682	458.7			33	13	350.448	131.635
	272	29	279.146	468.708			33	14	353.335	136.253
	272	30	277.606	478.33			33	15	354.49	141.449
	28	1	356.51	143.855			33	16	353.335	143.759
	28	2	353.046	151.553			33	17	353.335	148.378
	28	3	350.352	158.866			33	18	351.025	152.996
	28	4	349.967	167.334			33	19	351.603	159.347
	28	5	348.812	171.952			33	20	352.18	163.966
	28	6	346.503	176.956			33	21	352.758	172.626
	28	7	343.424	185.424			33	22	351.603	181.286
	28	8	339.19	191.197			33	23	354.49	191.678
	28	9	338.805	195.816			33	24	352.18	199.761
	28	10	337.65	200.435			33	25	351.025	208.999
	28	11	338.805	206.593			33	26	351.025	218.814
	28	12	338.805	211.597			33	27	350.448	227.474
	28	13	336.881	217.37			33	28	348.139	235.557
	28	14	334.186	220.064			33	29	347.561	245.371
	28	15	333.801	225.068			33	30	345.252	253.454
	28	16	331.492	232.766			33	31	343.52	261.537
	28	17	330.337	238.924			33	32	340.056	270.775
	28	18	329.568	245.853			33	33	339.479	279.435
	28	19	331.492	252.396			33	34	336.592	282.899
	28	20	337.65	257.399			33	35	334.282	289.827
	28	21	339.19	260.094			33	36	331.973	297.91
	28	22	341.114	265.097			33	37	330.818	304.261
	28	23	344.963	274.72			33	38	328.509	311.189
	28	24	344.963	285.112			33	39	325.045	319.272
	28	25	341.499	295.889			34	1	127.593	83.715
	28	26	342.269	307.436			34	2	124.706	89.488
	28	27	339.575	320.522			34	3	124.706	95.262
	28	28	335.726	332.069			34	4	125.861	103.345
	28	29	329.568	345.926			34	5	125.861	110.273
	281	1	318.79	358.05			34	6	125.284	113.16
	281	2	313.402	371.521			34	7	123.552	118.933
	281	3	311.092	381.913			34	8	123.552	125.284
	281	4	307.628	395			34	9	124.706	131.057
	281	5	301.47	405.777			34	10	123.552	137.985
	281	6	296.082	416.169			34	11	124.129	142.604
	281	7	291.463	428.486			34	12	120.088	150.11
	281	8	287.229	440.033			34	13	116.624	161.079
	281	9	284.535	450.04			34	14	114.892	170.317
	281	10	281.455	458.893			34	15	115.469	178.399
	282	1	331.492	357.665			34	16	116.046	185.905
	282	2	329.568	371.906			34	17	116.046	191.678
	282	3	328.798	386.917			34	18	116.624	200.339
	282	4	328.413	396.924			34	19	116.624	210.153
	282	5	323.794	407.701			34	20	116.046	215.35
	282	6	317.251	418.863			34	21	114.892	219.968
	282	7	311.477	428.871			34	22	112.005	224.01
	282	8	306.089	439.263			34	23	112.005	222.278
	282	9	303.01	448.5			34	24	112.582	227.474
	282	10	297.236	457.738			34	25	113.16	234.979
	29	1	375.948	130.191			34	26	109.695	241.33
	29	2	373.638	136.734			34	27	109.118	249.99
	29	3	371.714	140.198			34	28	110.273	256.341
	29	4	371.329	144.817			34	29	107.963	263.269
	29	5	371.329	150.591			34	30	107.386	272.507
	29	6	367.095	157.519			34	31	107.963	277.125
	29	7	364.786	165.602			34	32	111.427	283.476
	29	8	360.552	173.3			34	33	112.005	290.982
	29	9	360.552	181.767			34	34	113.737	297.332
	29	10	360.552	188.311			34	35	113.737	300.797
	29	11	360.552	194.469			34	36	117.778	307.147
	29	12	356.703	199.088			34	37	119.51	311.189
	29	13	355.933	205.246			34	38	121.242	314.653
	29	14	355.163	212.174			34	39	124.706	319.272
	29	15	354.008	217.948			35	1	107.963	114.892
	29	16	353.239	225.645			35	2	107.963	126.438
	291	1	345.733	238.924			35	3	110.273	133.944
	291	2	344.194	246.622			35	4	109.118	141.449
	291	3	343.809	251.626			35	5	110.273	148.955
	291	4	345.733	258.939			35	6	110.273	157.038
	291	5	347.273	262.788			35	7	112.005	164.543
	291	6	348.427	270.871			35	8	112.582	173.781
	291	7	349.967	281.648			35	9	112.582	178.977
	291	8	349.197	291.655			35	10	112.582	184.173
	291	9	347.658	302.817			35	11	111.427	191.678
	291	10	349.967	316.673			35	12	111.427	198.607
	291	11	348.812	327.835			35	13	110.85	204.38
	291	12	348.812	337.458			35	14	111.427	211.308
	291	13	349.197	347.85			35	15	110.85	219.391
	291	14	346.118	361.321			35	16	109.695	224.01
	291	15	342.077	375.755			35	17	110.85	228.051
	291	16	338.228	390.766			35	18	113.737	234.979
	291	17	333.994	401.543			35	19	114.892	243.639
	291	18	329.76	412.32			35	20	115.469	250.568
	291	19	323.217	423.482			35	21	115.469	259.805
	291	20	318.213	436.184			35	22	114.314	267.888
	291	21	313.209	446.576			35	23	114.314	275.971
	291	22	310.13	456.198			35	24	112.582	283.476
	291	23	305.511	466.206			35	25	113.16	292.714
	292	1	357.857	236.423			35	26	111.427	302.529
	292	2	361.321	244.505			35	27	111.427	311.189
	292	3	362.091	251.049			35	28	113.737	321.004
	292	4	362.091	260.286			35	29	113.737	327.932
	292	5	361.706	268.754			35	30	116.046	337.169
	292	6	359.782	279.531			35	31	117.201	346.407
	292	7	359.397	291.078			35	32	116.624	350.448
	292	8	358.242	299.161			35	33	116.046	355.067
	292	9	355.548	309.168			35	34	120.088	357.954
	292	10	356.318	324.564			35	35	123.552	367.191
	292	11	352.469	334.956			35	36	126.438	372.387
	292	12	349.775	346.118			35	37	127.016	378.738
	292	13	346.695	356.51			35	38	130.48	383.357
	292	14	342.462	367.672			35	39	131.057	389.708
	292	15	338.228	380.759			36	1	87.179	148.955
	292	16	335.533	391.151			36	2	88.334	158.77
	292	17	335.149	401.543			36	3	88.911	166.275
	292	18	329.76	413.86			36	4	90.643	174.935
	292	19	324.756	425.792			36	5	90.643	182.441
	292	20	319.368	438.108			36	6	91.798	190.524
	292	21	315.904	450.425			36	7	94.107	198.607
	292	22	314.749	463.127			36	8	97.571	207.844
	292	23	310.9	473.519			36	9	98.149	215.927
	30	1	383.453	148.089			36	10	98.726	225.164
	30	2	381.529	155.017			36	11	101.613	232.093
	30	3	379.989	159.636			36	12	103.922	240.753
	30	4	376.14	167.719			36	13	103.922	249.413
	30	5	375.37	173.492			36	14	104.499	256.341
	30	6	373.831	180.42			36	15	105.654	264.424
	30	7	373.061	188.503			36	16	106.809	271.352
	30	8	369.597	195.431			36	17	109.118	278.28
	30	9	367.287	203.129			36	18	109.695	288.095
	30	10	366.133	208.902			36	19	110.273	297.91
	30	11	364.593	216.985			36	20	109.695	304.838
	30	12	361.129	225.068			36	21	109.118	312.921
	30	13	358.82	228.917			36	22	109.118	322.158
	30	14	356.51	231.611			36	23	109.695	330.241
	30	15	353.816	238.54			36	24	109.118	337.169
	30	16	354.201	244.698			36	25	108.541	344.675
	30	17	351.507	252.781			36	26	107.386	355.644
	30	18	349.967	257.784			36	27	109.695	364.882
	30	19	351.122	262.788			36	28	111.427	375.851
	30	20	351.122	270.486			36	29	114.892	385.089
	30	21	348.427	275.874			36	30	118.933	394.904
	30	22	345.733	284.342			36	31	122.974	405.296
	30	23	344.194	293.965			36	32	125.861	412.801
	30	24	338.805	301.663			36	33	131.635	422.616
	30	25	336.111	312.055			36	34	136.253	431.854
	30	26	334.571	322.447			36	35	140.872	442.246
	30	27	333.032	333.994			36	36	145.491	449.751
	30	28	330.722	344.771			36	37	148.955	458.989
	30	29	329.568	356.703			36	38	154.728	469.381
	30	30	326.873	369.404			36	39	158.77	480.928
	30	31	324.949	381.721			37	1	88.911	109.118
	30	32	323.409	393.653			37	2	90.066	122.397
	30	33	323.409	405.2			37	3	91.22	131.057
	30	34	318.021	418.671			37	4	91.22	140.872
	30	35	313.017	429.833			37	5	91.798	147.8
	30	36	308.398	439.84			37	6	91.22	157.038
	30	37	303.395	449.848			37	7	92.375	162.811
	30	38	299.93	459.085			37	8	92.952	171.471
	30	39	294.927	471.017			37	9	94.107	180.131
	31	1	382.298	160.598			37	10	94.685	187.637
	31	2	378.449	166.756			37	11	94.685	195.142
	31	3	374.985	174.839			37	12	95.839	204.38
	31	4	368.057	180.613			37	13	95.839	212.463
	31	5	366.902	185.231			37	14	94.685	219.391
	31	6	364.593	192.544			37	15	95.839	228.628
	31	7	361.514	200.627			37	16	97.571	238.443
	31	8	356.895	206.401			37	17	97.571	243.639
	31	9	353.046	214.099			37	18	100.458	252.877
	31	10	349.197	220.257			37	19	102.767	260.96
	31	11	346.888	227.185			37	20	102.767	268.465
	31	12	342.269	235.268			37	21	102.19	277.125
	31	13	339.96	241.426			37	22	102.767	284.631
	31	14	336.881	248.739			37	23	99.881	292.136
	31	15	336.111	256.437			37	24	97.571	300.219
	31	16	333.801	264.135			37	25	95.839	307.725
	31	17	333.801	267.984			37	26	95.262	318.117
	31	18	331.877	275.682			37	27	95.839	329.086
	31	19	331.877	285.689			37	28	99.303	336.592
	31	20	326.681	296.466			37	29	99.881	346.407
	31	21	323.217	303.01			37	30	102.767	356.222
	31	22	317.828	311.477			37	31	107.963	367.191
	31	23	315.904	321.485			37	32	111.427	378.161
	31	24	312.055	328.798			37	33	116.046	382.779
	31	25	306.666	336.111			37	34	117.778	390.862
	31	26	302.817	345.348			37	35	117.778	393.749
	31	27	300.508	354.971			37	36	119.51	398.368
	31	28	295.119	363.438			37	37	122.397	405.873
	31	29	290.116	374.985			37	38	122.974	412.224
	31	30	285.497	386.147			37	39	126.438	417.42
	31	31	283.187	398.079			38	1	431.276	81.406
	31	32	279.916	410.203			38	2	428.39	89.488
	31	33	277.222	421.75			38	3	425.503	94.685
	31	34	271.448	431.373			38	4	422.039	103.345
	31	35	265.675	444.459			38	5	420.307	106.809
	31	36	262.98	453.697			38	6	418.575	116.046
	31	37	260.671	466.013			38	7	416.265	119.51
	31	38	259.516	475.251			38	8	418.575	124.129
	31	39	259.516	484.488			38	9	416.843	131.057
	32	1	402.89	133.848			38	10	415.688	137.408
	32	2	402.12	139.621			38	11	410.492	142.604
	32	3	399.811	143.855			38	12	409.337	152.996
	32	4	399.426	146.934			38	13	409.915	158.77
	32	5	399.426	150.783			38	14	411.069	165.698
	32	6	400.196	157.711			38	15	413.379	174.358
	32	7	399.426	167.719			38	16	411.647	181.864
	32	8	398.656	176.956			38	17	415.688	186.482
	32	9	400.581	183.884			38	18	419.729	188.214
	32	10	398.656	190.043			38	19	422.039	187.637
	32	11	395.577	191.967			38	20	422.039	192.833
	32	12	391.728	195.816			38	21	422.039	198.607
	32	13	388.649	205.823			38	22	420.884	207.844
	32	14	385.185	213.136			381	1	419.152	203.803
	32	15	385.57	218.525			381	2	417.42	211.885
	32	16	386.34	226.993			381	3	417.42	220.546
	32	17	386.34	237			381	4	415.688	232.67
	32	18	387.494	242.388			381	5	412.801	242.485
	32	19	389.034	251.626			381	6	409.915	250.568
	32	20	388.264	260.864			381	7	409.915	255.186
	32	21	387.11	270.871			381	8	408.183	260.382
	32	22	383.838	281.263			381	9	403.564	266.156
	32	23	384.223	293.58			381	10	401.254	271.929
	32	24	387.302	303.587			381	11	396.636	278.857
	32	25	385.377	314.364			381	12	394.904	284.054
	32	26	391.536	325.526			381	13	394.326	286.94
	32	27	390.766	333.994			381	14	390.862	291.559
	32	28	383.068	344.771			381	15	390.862	297.332
	32	29	377.68	355.933			381	16	386.243	301.374
	32	30	374.215	369.789			381	17	384.511	306.57
	32	31	368.442	381.336			382	1	420.307	226.896
	32	32	363.053	393.268			382	2	416.843	238.443
	32	33	358.82	405.969			382	3	416.265	251.145
	32	34	351.891	417.901			382	4	412.801	263.846
	32	35	346.118	429.063			382	5	411.069	276.548
	32	36	340.73	439.071			382	6	407.028	285.786
	32	37	337.65	451.002			382	7	402.986	296.755
	32	38	334.571	458.315			382	8	398.945	307.725
	32	39	330.337	469.862			382	9	394.326	316.385
	33	1	402.12	146.549			382	10	391.44	322.158
	33	2	399.811	154.247			382	11	386.243	330.818
	33	3	396.732	159.636			382	12	382.202	337.747
	33	4	396.732	166.564			382	13	380.47	344.097
	33	5	397.887	172.337			382	14	378.738	349.293
	33	6	398.272	178.881			382	15	375.851	357.954
	33	7	394.423	184.269			382	16	374.119	364.304
	33	8	389.804	191.967			382	17	370.078	370.655
	33	9	389.034	198.125			39	1	442.246	105.077
	33	10	388.264	203.129			39	2	441.669	111.427
	33	11	386.725	208.518			39	3	436.472	118.356
	33	12	385.955	213.906			39	4	435.895	127.016
	33	13	384.415	219.295			39	5	434.74	129.325
	33	14	386.34	225.068			39	6	432.431	137.408
	33	15	385.185	233.151			39	7	430.122	143.181
	33	16	385.57	241.234			39	8	429.544	150.11
	33	17	388.649	248.932			39	9	427.235	158.192
	33	18	389.804	254.32			39	10	425.503	165.121
	33	19	392.113	262.018			39	11	422.616	169.739
	33	20	395.577	271.641			39	12	423.194	174.935
	33	21	400.581	281.263			39	13	423.194	178.977
	33	22	397.887	292.04			39	14	422.039	187.06
	33	23	397.502	302.817			39	15	424.348	194.565
	33	24	394.807	315.904			39	16	424.348	203.225
	33	25	391.728	325.141			39	17	423.771	209.576
	33	26	393.653	337.458			39	18	423.771	218.814
	33	27	392.883	347.465			39	19	424.348	226.319
	33	28	388.649	358.242			39	20	423.194	234.979
	33	29	384.03	370.944			39	21	420.884	244.217
	33	30	380.566	383.645			39	22	418.575	256.341
	33	31	376.717	394.038			39	23	419.729	270.775
	33	32	372.868	405.2			39	24	419.729	283.476
	33	33	365.17	415.977			39	25	416.265	296.178
	33	34	356.318	427.909			39	26	414.533	309.457
	33	35	346.695	440.225			39	27	408.76	321.581
	33	36	340.152	449.463			39	28	406.451	330.241
	33	37	333.224	460.24			39	29	402.409	334.86
	33	38	331.3	469.477			39	30	400.677	338.901
	33	39	324.371	478.715			39	31	396.636	346.407
	34	1	437.723	113.641			39	32	393.172	356.799
	34	2	440.418	132.116			39	33	389.708	363.15
	34	3	440.033	144.817			39	34	384.511	370.655
	341	1	436.184	149.051			39	35	379.893	377.583
	341	2	431.95	155.979			39	36	375.274	381.625
	341	3	431.18	166.756			39	37	370.655	389.13
	341	4	426.561	172.915			39	38	368.346	394.904
	341	5	423.097	181.382			39	39	364.304	400.1
	341	6	421.558	188.695			40	1	462.453	112.005
	341	7	418.863	194.084			40	2	458.989	120.665
	341	8	418.094	198.318			40	3	456.68	127.016
	341	9	415.014	202.552			40	4	453.793	132.212
	341	10	413.09	209.48			40	5	452.638	136.831
	341	11	413.09	216.793			40	6	452.061	142.027
	341	12	416.169	227.57			40	7	449.751	144.913
	341	13	417.324	236.038			40	8	448.597	152.419
	341	14	416.939	243.351			40	9	448.019	159.347
	341	15	420.403	248.354			40	10	446.287	165.698
	341	16	421.943	254.513			40	11	445.133	172.049
	341	17	424.637	262.211			40	12	445.133	176.667
	341	18	422.328	269.909			40	13	445.133	183.596
	341	19	417.324	279.146			40	14	443.401	191.678
	341	20	415.784	288.384			40	15	445.133	200.916
	341	21	415.784	299.546			40	16	445.133	210.153
	341	22	415.784	314.941			40	17	443.978	217.659
	341	23	415.784	333.032			40	18	444.555	225.742
	341	24	410.781	344.963			40	19	444.555	236.711
	341	25	405.392	357.28			40	20	443.978	245.371
	341	26	399.234	368.442			40	21	441.091	254.032
	341	27	394.23	378.257			40	22	437.627	265.001
	341	28	389.996	392.498			40	23	438.205	279.435
	341	29	384.223	404.815			40	24	436.472	292.136
	341	30	379.989	414.822			40	25	435.318	303.106
	341	31	370.751	427.139			40	26	430.699	318.117
	341	32	363.053	438.686			40	27	430.122	329.086
	341	33	356.51	450.617			40	28	427.235	335.437
	341	34	350.352	462.934			40	29	421.462	341.211
	341	35	346.503	476.021			40	30	419.729	349.871
	341	36	338.42	485.643			40	31	416.265	359.108
	342	5	439.263	164.832			40	32	413.379	366.036
	342	6	436.184	169.451			40	33	410.492	372.965
	342	7	434.259	179.073			40	34	404.141	380.47
	342	8	430.41	186.386			40	35	401.254	386.821
	342	9	430.025	192.16			40	36	396.636	392.594
	342	10	427.331	199.857			40	37	393.749	400.1
	342	11	426.561	206.401			40	38	390.285	406.451
	342	12	426.561	212.944			40	39	390.285	413.956
	342	13	423.867	219.872			41	1	470.536	154.728
	342	14	424.637	226.03			41	2	467.072	165.698
	342	15	425.792	235.268			41	3	465.34	170.317
	342	16	425.022	244.505			41	4	464.762	177.245
	342	17	425.599	251.434			41	5	461.876	183.596
	342	18	423.675	259.901			41	6	458.989	193.41
	342	19	422.135	269.909			41	7	458.989	199.184
	342	20	421.365	281.071			41	8	458.412	207.267
	342	21	421.365	291.848			41	9	454.947	217.082
	342	22	419.441	301.855			41	10	452.638	222.855
	342	23	415.977	308.398			41	11	451.483	229.783
	342	24	415.207	319.945			41	12	450.329	238.443
	342	25	413.282	331.492			41	13	447.442	247.103
	342	26	406.354	343.809			41	14	447.442	253.454
	342	27	406.354	357.28			41	15	446.287	262.114
	342	28	403.275	368.057			41	16	445.71	269.62
	342	29	399.811	378.834			41	17	444.555	277.703
	342	30	393.653	389.226			41	18	444.555	286.363
	342	31	387.879	399.619			41	19	444.555	295.6
	342	32	384.415	412.705			41	20	444.555	305.415
	342	33	379.219	420.595			41	21	443.401	312.343
	342	34	373.831	429.063			41	22	439.359	322.158
	342	35	366.518	439.071			41	23	437.627	334.282
	342	36	359.974	450.233			41	24	433.586	344.097
	342	1	351.122	460.24			41	25	431.276	356.222
	342	2	343.424	472.941			41	26	429.544	368.923
	342	3	337.65	484.103			41	27	426.658	377.006
	342	4	329.183	494.111			41	28	422.616	386.821
							41	29	418.575	396.636
							41	30	413.379	407.028
							41	31	406.451	416.843
							41	32	401.832	427.812
							41	33	393.172	437.627
							41	34	390.285	446.287
							41	35	386.243	450.329
							41	36	382.202	456.68
							41	37	378.161	463.608
							41	38	371.81	471.113
							41	39	369.501	476.309
							42	1	490.743	128.748
							42	2	489.011	135.676
							42	3	486.701	142.604
							42	4	484.969	147.223
							42	5	483.815	154.151
							42	6	482.66	160.502
							42	7	480.928	165.121
							42	8	479.773	173.203
							42	9	478.619	183.018
							42	10	475.155	191.101
							42	11	474	200.339
							42	12	472.845	207.267
							42	13	471.113	215.35
							42	14	469.958	224.587
							42	15	467.649	234.979
							42	16	467.649	241.33
							42	17	469.381	249.413
							42	18	469.381	258.65
							42	19	467.649	266.156
							42	20	464.762	273.661
							42	21	464.185	283.476
							42	22	464.185	294.446
							42	23	461.876	306.57
							42	24	460.144	318.694
							42	25	458.412	331.396
							42	26	453.793	345.252
							42	27	449.751	356.799
							42	28	446.865	364.304
							42	29	444.555	367.768
							42	30	441.091	373.542
							42	31	436.472	378.161
							42	32	433.008	385.089
							42	33	427.235	390.862
							42	34	421.462	397.79
							421	1	419.152	400.677
							421	2	420.307	397.79
							421	3	417.42	404.141
							421	4	415.111	409.337
							421	5	412.801	412.801
							422	1	414.533	407.028
							422	2	409.915	417.997
							422	3	404.719	425.503
							422	4	401.254	433.008
							422	5	396.636	440.514
							43	1	494.784	164.543
							43	2	491.898	172.626
							43	3	490.166	180.709
							43	4	487.856	187.637
							43	5	484.969	193.988
							43	6	484.392	202.071
							43	7	479.773	210.153
							43	8	479.196	218.814
							43	9	479.196	228.051
							43	10	476.887	235.557
							43	11	474	243.639
							43	12	473.423	251.722
							43	13	472.268	260.96
							43	14	471.113	268.465
							43	15	469.958	277.703
							43	16	468.804	286.363
							43	17	466.494	296.178
							43	18	465.34	305.415
							43	19	463.608	314.653
							43	20	462.453	323.313
							43	21	460.721	331.396
							43	22	458.412	340.633
							43	23	454.947	353.335
							43	24	451.483	363.727
							43	25	447.442	375.274
							43	26	446.865	388.553
							43	27	442.246	398.945
							43	28	437.05	408.76
							43	29	431.276	419.729
							43	30	426.658	428.39
							43	31	418.575	437.627
							43	32	412.801	445.71
							43	33	405.296	453.793
							43	34	397.213	462.453
							43	35	390.862	470.536
							43	36	385.666	479.196
							43	37	381.047	486.701
							43	38	375.851	494.207
							43	39	370.655	500.558

## Sheet: Fig.3G
Embryo ID	Track ID	EVL margin Y Position (mm)	DFC Cluster Center Y Position (mm)	Delta Y EVL margin (mm)	Delta Y DFC cluster (mm)
1	1	211.308	174.146
1	2	219.968	179.941	8.66	5.795			Parameters	Value	Standard Error	t-Value
1	3	228.051	187.672	8.083	7.731			Intercept	0	--	--
1	4	236.711	193.851	8.66	6.179			Slope	0.8695	0.02509	34.6494
1	5	243.639	203.189	6.928	9.338
1	6	252.3	208.224	8.661	5.035			Statistics
1	7	259.228	215.01	6.928	6.786			Number of Points	62
1	8	267.311	223.529	8.083	8.519			Degrees of Freedom	61
1	9	274.239	230.623	6.928	7.094			Residual Sum of Squares	276.327
1	10	282.899	238.628	8.66	8.005			Pearson's r	0.97552
1	11	291.559	244.662	8.66	6.034			R-Square(COD)	0.95165
1	12	299.064	251.915	7.505	7.253			Adj. R-Square	0.95086
1	13	307.725	259.378	8.661	7.463
1	14	316.962	266.323	9.237	6.945
1	15	325.622	273.781	8.66	7.458
1	16	334.86	285.223	9.238	11.442
1	17	344.675	294.61	9.815	9.387
1	18	353.912	306.233	9.237	11.623
1	19	362.572	317.467	8.66	11.234
1	20	374.697	328.772	12.125	11.305
1	21	384.511	338.296	9.814	9.524
1	22	394.904	348.068	10.393	9.772
1	23	406.451	362.915	11.547	14.847
1	24	419.729	377.184	13.278	14.269
1	25	430.122	388.97	10.393	11.786
1	26	439.937	401.888	9.815	12.918
1	27	450.329	414.37	10.392	12.482
1	28	463.608	427.159	13.279	12.789
1	29	474	437.376	10.392	10.217
1	30	484.969	446.351	10.969	8.975
1	31	495.362	456.187	10.393	9.836
1	32	505.176	466.57	9.814	10.383
2	1	146.79	116.633
2	2	157.618	127.176	10.8287	10.5432
2	3	170.051	133.556	12.433	6.38013
2	4	177.27	142.041	7.21916	8.48452
2	5	184.891	146.132	7.62022	4.09126
2	6	191.308	150.097	6.41703	3.96532
2	7	196.121	155.727	4.81277	5.62934
2	8	200.452	158.812	4.3315	3.08539
2	9	210.96	166.66	10.5079	7.84763
2	10	218.981	171.155	8.02129	4.49593
2	11	230.211	182.787	11.2298	11.6313
2	12	236.227	185.743	6.01597	2.95665
2	13	247.457	192.527	11.2298	6.7836
2	14	258.286	203.781	10.8287	11.2539
3	1	75.601	65.52
3	2	87.232	74.029	11.631	8.509
3	3	99.665	85.305	12.433	11.276
3	4	110.093	92.956	10.428	7.651
3	5	124.13	104.802	14.037	11.846
3	6	136.563	114.939	12.433	10.137
3	7	148.194	122.635	11.631	7.696
3	8	163.836	136.332	15.642	13.697
3	9	177.873	147.215	14.037	10.883
3	10	191.51	158.806	13.637	11.591
3	11	203.141	167.559	11.631	8.753
3	12	217.178	180.433	14.037	12.874
3	13	230.814	193.241	13.636	12.808
3	14	245.654	201.952	14.84	8.711
3	15	258.889	209.357	13.235	7.405
3	16	276.135	223.032	17.246	13.675
3	17	289.771	231.901	13.636	8.869
3	18	303.006	243.117	13.235	11.216
3	19	317.044	254.554	14.038	11.437
