# Supplementary material for: Apical contacts stemming from incomplete delamination guide progenitor cell allocation through a dragging mechanism
Source: eLife. 2021 Aug 27;10:e66483. doi: 10.7554/eLife.66483 (PMC8460252; doi:10.7554/eLife.66483)
Supplement: Figure 4—source data 1. [file elife-66483-fig4-data1.xlsx]

## Sheet: Fig.4B
			Lateral DFCs										Medial DFCs
	Time (min)		DFC 1	DFC 2	DFC 3	DFC 4	DFC 5	DFC 6	Mean	Standard deviation			DFC 1	DFC 2	DFC 3	DFC 4	DFC 5	DFC 6	DFC 7	DFC 8	DFC 9	DFC 10	DFC 11	Mean	Standard deviation
	0		0	0	0	0	0	0	0	0			0	0	0	0	0	0	0	0	0	0	0	0	0
	0.83		3.226	2.741	1.075	0.962	0.34	1.521	1.64417	1.1145			1.02	1.831	1.075	3.417	1.7	2.068	0	1.226	1.402	1.521	3.226	1.68055	0.929992
	1.66		4.926	5.331	2.596	2.322	1.742	2.922	3.3065	1.46908			1.7	2.851	2.037	4.643	2.775	2.408	0.962	2.452	2.364	3.041	5.294	2.77518	1.17962
	2.49		6.001	9.425	3.822	5.042	3.476	4.656	5.40367	2.16496			2.46	4.253	3.112	7.232	3.455	3.768	2.037	4.904	3.439	5.024	6.994	4.24345	1.60586
	3.32		8.405	12.33	4.302	8.102	5.176	4.656	7.16183	3.08353			3.221	5.328	4.338	8.753	4.215	4.108	2.797	6.972	4.799	6.757	9.062	5.48636	2.02203
	4.15		9.765	15.235	5.063	10.843	7.556	5.676	9.023	3.78122			4.622	6.73	5.74	9.828	5.915	4.788	3.278	8.374	7.388	8.491	11.102	6.93236	2.26182
	4.98		10.525	16.196	5.403	11.863	9.936	7.036	10.1598	3.79224			5.642	7.692	6.42	11.054	6.991	4.788	5.318	10.356	8.79	9.566	11.862	8.04355	2.32629
	5.81		11.927	17.598	6.163	13.089	12.316	9.213	11.7177	3.84677			7.376	8.712	7.44	11.394	8.351	5.548	5.318	11.716	10.49	10.926	13.222	9.13573	2.48099
	6.64		14.104	17.938	6.843	15.994	15.036	11.363	13.5463	3.93725			7.716	9.192	8.12	11.875	9.111	6.774	6.338	13.997	11.716	11.888	14.582	10.119	2.71111
	7.47		16.579	19.298	7.918	16.754	17.186	13.514	15.2082	4.02304			8.396	9.953	9.64	12.635	9.111	8.474	7.018	15.017	14.457	12.369	14.922	11.0902	2.75449
	8.3		17.654	20.058	8.993	18.156	18.546	14.74	16.3578	4.00627			8.736	11.028	10.121	13.71	10.131	9.235	9.422	16.419	15.817	12.849	15.682	12.1045	2.76492
	9.13		20.31	21.758	10.514	19.856	25.006	15.815	18.8765	5.06344			10.776	11.788	11.196	15.778	11.206	11.686	11.703	18.823	16.577	13.869	16.644	13.6405	2.70079
	9.96		22.46	23.741	12.582	22.006	29.1	16.835	21.1207	5.73392			11.796	12.269	12.717	16.853	12.566	13.754	12.778	20.049	17.337	14.889	18.046	14.8231	2.67453
	10.79		23.535	25.101	14.102	25.355	30.326	17.515	22.6557	5.87307			12.277	13.629	13.397	17.929	14.087	14.774	13.259	21.01	19.071	16.115	19.066	15.874	2.803
	11.62		24.296	26.121	16.253	29.017	30.807	19.555	24.3415	5.57075			12.617	14.309	13.397	19.154	15.488	16.295	13.259	22.412	19.552	16.795	19.826	16.6458	3.0645
	12.45		25.371	26.881	16.933	30.243	32.167	21.836	25.5718	5.57954			13.579	14.309	14.077	20.556	16.249	17.521	13.259	23.092	21.073	17.556	22.546	17.6197	3.50984
	13.28		27.071	27.561	18.453	30.923	33.569	23.536	26.8522	5.36248			14.599	14.989	14.837	22.624	16.929	17.861	13.599	23.573	22.515	18.631	23.306	18.4966	3.69073
	14.11		28.146	28.581	19.133	32.443	34.97	24.938	28.0352	5.59772			15.079	16.064	15.517	23.586	17.41	18.881	14.619	24.799	23.875	19.706	26.048	19.5985	4.0734

## Sheet: Fig4D
Y psosition							Relative Position Respect to Embryo Margin at Start Time						Relative Position Respect to Embryo Margin at Actual Time					Normalization
	DFC 1	Apical Attachment 1	DFC 2	Apical Attachment 2	Embryo Margin		DFC 1	Apical Attachment 1	DFC 2	Apical Attachment 2	Embryo Margin		DFC 1	Apical Attachment 1	DFC 2	Apical Attachment 2		DFC 1	Apical Attachment 1	DFC 2	Apical Attachment 2		DFC Mean	Apical Attachment Mean
Time (sec)	Y position (mm)	Y position (mm)	Y position (mm)	Y position (mm)	Y position (mm)		Y position (mm)	Y position (mm)	Y position (mm)	Y position (mm)	Y position (mm)		Y position (mm)	Y position (mm)	Y position (mm)	Y position (mm)		Y position (mm)	Y position (mm)	Y position (mm)	Y position (mm)		Y position (mm)	Y position (mm)
4.675	91.8653	105.413	91.494	101.288	126.933		-35.0677	-21.5201	-35.439	-25.645	0		35.0677	21.5201	35.439	25.645		0.53536	0.382006	0.260592	0.352148		0.397976	0.367077
9.35	92.2366	105.784	91.8653	101.659	127.205		-34.6964	-21.1488	-35.0677	-25.2737	0.272		34.9684	21.4208	35.3397	25.5457		0.5179	0.367638	0.24262	0.334885		0.38026	0.351261
14.025	92.9788	105.97	91.8366	101.845	127.387		-33.9542	-20.9632	-35.0964	-25.088	0.454		34.4082	21.4172	35.5504	25.542		0.419376	0.367111	0.280765	0.334253		0.35007	0.350682
18.7	93.241	105.97	91.8219	101.845	127.568		-33.692	-20.9632	-35.1111	-25.088	0.635		34.327	21.5982	35.7461	25.723		0.405092	0.393307	0.316191	0.365724		0.360641	0.379516
23.375	93.1501	106.155	91.7509	102.031	127.659		-33.7829	-20.7775	-35.1821	-24.9024	0.726		34.5089	21.5035	35.9081	25.6284		0.437075	0.37961	0.345505	0.349269		0.39129	0.364439
28.05	94.0201	106.341	92.1366	102.216	127.84		-32.9129	-20.5919	-34.7964	-24.7171	0.907		33.8199	21.4989	35.7034	25.6241		0.315907	0.378938	0.308461	0.348521		0.312184	0.363729
32.725	94.0101	106.526	92.1366	102.216	127.931		-32.9229	-20.4066	-34.7964	-24.7171	0.998		33.9209	21.4046	35.7944	25.7151		0.333668	0.36529	0.324934	0.364344		0.329301	0.364817
37.4	94.4771	106.712	92.0509	102.216	128.293		-32.4559	-20.2209	-34.8821	-24.7171	1.36		33.8159	21.5809	36.2421	26.0771		0.315214	0.390815	0.405966	0.427287		0.36059	0.409051
42.075	94.4914	106.712	91.7609	102.402	128.293		-32.4416	-20.2209	-35.1721	-24.5315	1.36		33.8016	21.5809	36.5321	25.8915		0.312689	0.390815	0.458463	0.395008		0.385576	0.392912
46.75	94.8345	106.898	91.8653	102.216	128.112		-32.0985	-20.0353	-35.0677	-24.7171	1.179		33.2775	21.2143	36.2467	25.8961		0.220521	0.337751	0.406806	0.395815		0.313664	0.366783
51.425	94.8345	106.898	92.0509	102.402	128.475		-32.0985	-20.0353	-34.8821	-24.5315	1.542		33.6405	21.5773	36.4241	26.0735		0.284361	0.390288	0.438912	0.426654		0.361637	0.408471
56.1	94.6492	107.083	92.0509	102.587	128.475		-32.2838	-19.8497	-34.8821	-24.3458	1.542		33.8258	21.3917	36.4241	25.8878		0.316949	0.36342	0.438912	0.394375		0.37793	0.378898
60.775	94.4636	107.083	92.4219	102.587	128.837		-32.4694	-19.8497	-34.5111	-24.3458	1.904		34.3734	21.7537	36.4151	26.2498		0.41326	0.415813	0.437294	0.457319		0.425277	0.436566
65.45	94.6492	107.269	92.6075	102.587	128.837		-32.2838	-19.664	-34.3255	-24.3458	1.904		34.1878	21.568	36.2295	26.2498		0.380612	0.388945	0.403689	0.457319		0.392151	0.423132
70.125	95.2058	107.269	92.6075	102.587	129.2		-31.7272	-19.664	-34.3255	-24.3458	2.267		33.9942	21.931	36.5925	26.6128		0.346568	0.441482	0.4694	0.520436		0.407984	0.480959
74.8	95.2058	107.269	92.9788	102.958	129.381		-31.7272	-19.664	-33.9542	-23.9745	2.448		34.1752	22.112	36.4022	26.4225		0.378399	0.467679	0.434955	0.487351		0.406677	0.477515
79.475	95.3914	107.455	92.9788	102.773	129.653		-31.5416	-19.4784	-33.9542	-24.1602	2.72		34.2616	22.1984	36.6742	26.8802		0.393587	0.480178	0.484193	0.566923		0.43889	0.52355
84.15	95.0201	107.64	93.5354	102.958	129.653		-31.9129	-19.2927	-33.3976	-23.9745	2.72		34.6329	22.0127	36.1176	26.6945		0.458883	0.45331	0.38344	0.534645		0.421161	0.493977
88.825	95.5771	107.826	93.721	103.144	129.835		-31.3559	-19.1074	-33.212	-23.7889	2.902		34.2579	22.0094	36.114	26.6909		0.392947	0.452832	0.382781	0.534012		0.387864	0.493422
93.5	95.7627	107.826	93.3501	103.329	129.925		-31.1703	-19.1074	-33.5829	-23.6036	2.992		34.1623	22.0994	36.5749	26.5956		0.376127	0.465858	0.466221	0.517442		0.421174	0.49165
98.175	95.7627	108.011	92.9788	103.515	129.925		-31.1703	-18.9218	-33.9542	-23.418	2.992		34.1623	21.9138	36.9462	26.41		0.376127	0.43899	0.533431	0.485163		0.454779	0.462077
102.85	96.3193	108.011	93.5354	103.701	129.925		-30.6137	-18.9218	-33.3976	-23.2323	2.992		33.6057	21.9138	36.3896	26.2243		0.278244	0.43899	0.432678	0.452885		0.355461	0.445937
107.525	96.1336	108.011	93.721	103.701	130.107		-30.7994	-18.9218	-33.212	-23.2323	3.174		33.9734	22.0958	36.386	26.4063		0.342899	0.465331	0.432019	0.48453		0.387459	0.474931
112.2	96.1336	108.011	93.721	104.072	130.107		-30.7994	-18.9218	-33.212	-22.861	3.174		33.9734	22.0958	36.386	26.035		0.342899	0.465331	0.432019	0.419974		0.387459	0.442652
116.875	93.721	105.599	92.2366	102.216	130.469		-33.212	-21.3344	-34.6964	-24.7171	3.536		36.748	24.8704	38.2324	28.2531		0.830863	0.866908	0.766265	0.805641		0.798564	0.836275
121.55	92.7931	104.671	91.494	100.917	130.288		-34.1399	-22.2623	-35.439	-26.0159	3.355		37.4949	25.6173	38.794	29.3709		0.96221	0.975002	0.867919	1		0.915065	0.987501
126.225	92.7931	104.671	91.494	100.917	130.197		-34.1399	-22.2623	-35.439	-26.0159	3.264		37.4039	25.5263	38.703	29.2799		0.946206	0.961831	0.851446	0.984177		0.898826	0.973004
130.9	93.1223	105.042	91.3084	101.659	130.832		-33.8107	-21.891	-35.6246	-25.2737	3.899		37.7097	25.79	39.5236	29.1727		1	1	1	0.965534		1	0.982767
135.575	93.5354	105.413	92.0509	101.845	130.651		-33.3976	-21.5201	-34.8821	-25.088	3.718		37.1156	25.2381	38.6001	28.806		0.895518	0.920117	0.832816	0.901784		0.864167	0.910951
140.25	94.6492	105.97	92.4219	102.031	130.56		-32.2838	-20.9632	-34.5111	-24.9024	3.627		35.9108	24.5902	38.1381	28.5294		0.683628	0.826343	0.749194	0.853683		0.716411	0.840013
144.925	95.0201	106.341	91.494	102.773	130.469		-31.9129	-20.5919	-35.439	-24.1602	3.536		35.4489	24.1279	38.975	27.6962		0.602389	0.759436	0.900684	0.708806		0.751537	0.734121
149.6	95.7627	107.083	92.2366	103.144	130.741		-31.1703	-19.8497	-34.6964	-23.7889	3.808		34.9783	23.6577	38.5044	27.5969		0.519634	0.691381	0.815503	0.691544		0.667568	0.691462
154.275	96.5049	107.269	93.3501	103.329	130.923		-30.4281	-19.664	-33.5829	-23.6036	3.99		34.4181	23.654	37.5729	27.5936		0.42111	0.690854	0.646881	0.69097		0.533996	0.690912
158.95	96.5049	107.64	94.4636	104.443	130.832		-30.4281	-19.2927	-32.4694	-22.4901	3.899		34.3271	23.1917	36.3684	26.3891		0.405106	0.623948	0.42884	0.481536		0.416973	0.552742
163.625	97.0615	108.382	95.5771	104.629	131.104		-29.8715	-18.5505	-31.3559	-22.3045	4.171		34.0425	22.7215	35.5269	26.4755		0.355059	0.555892	0.276511	0.496552		0.315785	0.526222
168.3	96.6906	108.754	95.7627	104.814	131.195		-30.2424	-18.1792	-31.1703	-22.1188	4.262		34.5044	22.4412	35.4323	26.3808		0.436298	0.515327	0.259379	0.480096		0.347838	0.497712
172.975	97.2471	109.125	96.3193	105.371	131.104		-29.6859	-17.8083	-30.6137	-21.5619	4.171		33.8569	21.9793	34.7847	25.7329		0.322411	0.44847	0.142153	0.367439		0.232282	0.407954
177.65	97.0615	109.31	96.1336	105.557	131.376		-29.8715	-17.6227	-30.7994	-21.3763	4.443		34.3145	22.0657	35.2424	25.8193		0.402894	0.460969	0.224995	0.382455		0.313945	0.421712
182.325	97.2471	110.238	95.948	105.928	131.376		-29.6859	-16.6948	-30.985	-21.0053	4.443		34.1289	21.1378	35.428	25.4483		0.370246	0.326679	0.2586	0.317957		0.314423	0.322318
187	97.8041	110.795	96.1336	105.928	131.648		-29.1289	-16.1379	-30.7994	-21.0053	4.715		33.8439	20.8529	35.5144	25.7203		0.320139	0.285442	0.274233	0.365251		0.297186	0.325346
191.675	98.5463	110.795	96.1336	106.113	131.376		-28.3867	-16.1379	-30.7994	-20.8197	4.443		32.8297	20.5809	35.2424	25.2627		0.141772	0.246075	0.224995	0.285679		0.183384	0.265877
196.35	98.5463	111.166	96.3193	106.67	131.557		-28.3867	-15.7666	-30.6137	-20.2628	4.624		33.0107	20.3906	35.2377	24.8868		0.173604	0.218535	0.224156	0.220315		0.19888	0.219425
201.025	98.9176	111.352	96.5049	106.67	131.648		-28.0154	-15.5813	-30.4281	-20.2628	4.715		32.7304	20.2963	35.1431	24.9778		0.124312	0.204887	0.207024	0.236138		0.165668	0.220513
205.7	99.1032	111.537	97.2471	107.041	131.648		-27.8298	-15.3957	-29.6859	-19.8918	4.715		32.5448	20.1107	34.4009	24.6068		0.0916647	0.178019	0.0726657	0.17164		0.0821652	0.17483
210.375	99.4741	111.909	96.6906	107.227	131.739		-27.4589	-15.0244	-30.2424	-19.7062	4.806		32.2649	19.8304	35.0484	24.5122		0.0424329	0.137454	0.189892	0.155184		0.116162	0.146319
215.05	99.1032	112.465	97.6184	107.412	131.829		-27.8298	-14.4678	-29.3146	-19.5205	4.896		32.7258	19.3638	34.2106	24.4165		0.123496	0.0699254	0.0382209	0.138555		0.0808586	0.10424
219.725	99.4741	112.465	97.6184	107.412	131.829		-27.4589	-14.4678	-29.3146	-19.5205	4.896		32.3549	19.3638	34.2106	24.4165		0.0582608	0.0699254	0.0382209	0.138555		0.0482408	0.10424
224.4	99.4741	112.651	97.6184	107.969	132.283		-27.4589	-14.2822	-29.3146	-18.964	5.35		32.8089	19.6322	34.6646	24.314		0.138104	0.108766	0.120405	0.120719		0.129254	0.114742
229.075	99.8454	113.208	98.3606	108.155	132.373		-27.0876	-13.7252	-28.5724	-18.7783	5.44		32.5276	19.1652	34.0124	24.2183		0.0886363	0.0411876	0.0023388	0.104089		0.0454875	0.0726384
233.75	99.6598	113.208	98.5463	108.712	132.555		-27.2732	-13.7252	-28.3867	-18.2214	5.622		32.8952	19.3472	34.0087	23.8434		0.153292	0.0675287	0.00167988	0.0388996		0.0774857	0.0532141
238.425	99.6598	113.764	98.5463	108.526	132.645		-27.2732	-13.1687	-28.3867	-18.407	5.712		32.9852	18.8807	34.0987	24.119		0.169119	0	0.0179718	0.0868268		0.0935456	0.0434134
243.1	100.031	113.579	98.9176	108.712	133.008		-26.9019	-13.3543	-28.0154	-18.2214	6.075		32.9769	19.4293	34.0904	24.2964		0.167663	0.0794053	0.016473	0.117665		0.0920681	0.0985354
247.775	100.217	113.95	98.9176	108.897	132.917		-26.7163	-12.983	-28.0154	-18.0358	5.984		32.7003	18.967	33.9994	24.0198		0.119012	0.012499	0	0.0695644		0.0595059	0.0410317
252.45	100.588	113.95	98.3606	109.083	133.189		-26.3454	-12.983	-28.5724	-17.8501	6.256		32.6014	19.239	34.8284	24.1061		0.101612	0.0518659	0.150052	0.0845803		0.125832	0.0682231
257.125	100.402	114.321	98.3606	109.083	133.371		-26.5307	-12.6117	-28.5724	-17.8501	6.438		32.9687	19.0497	35.0104	24.2881		0.166207	0.0244712	0.182998	0.116226		0.174603	0.0703485
261.8	100.773	114.136	98.7319	109.083	133.461		-26.1597	-12.7974	-28.2011	-17.8501	6.528		32.6877	19.3254	34.7291	24.3781		0.116799	0.0643649	0.132081	0.131875		0.12444	0.0981197
266.475	101.145	114.507	98.3606	109.268	133.552		-25.7884	-12.4261	-28.5724	-17.6648	6.619		32.4074	19.0451	35.1914	24.2838		0.0675078	0.0237996	0.215763	0.115478		0.141636	0.0696389
271.15	100.959	114.321	98.9176	109.639	133.733		-25.9741	-12.6117	-28.0154	-17.2935	6.8		32.7741	19.4117	34.8154	24.0935		0.131987	0.0768638	0.147714	0.082393		0.13985	0.0796284
275.825	101.701	114.693	99.1032	110.011	133.824		-25.2315	-12.2405	-27.8298	-16.9223	6.891		32.1225	19.1315	34.7208	23.8133		0.0174001	0.0362986	0.130582	0.0336589		0.073991	0.0349788
280.5	101.887	114.693	98.7319	110.011	133.915		-25.0462	-12.2405	-28.2011	-16.9223	6.982		32.0282	19.2225	35.1831	23.9043		0.000816016	0.0494691	0.214265	0.0494817		0.10754	0.0494754
285.175	102.072	114.878	99.2888	110.382	134.096		-24.8606	-12.0552	-27.6442	-16.5513	7.163		32.0236	19.2182	34.8072	23.7143		0	0.0488468	0.146215	0.0164556		0.0731074	0.0326512
289.85	101.516	115.249	100.031	110.567	134.187		-25.4172	-11.6839	-26.9019	-16.3657	7.254		32.6712	18.9379	34.1559	23.6197		0.113887	0.00828152	0.0283299	0		0.0711085	0.00414076
												Maximum	37.7097	25.79	39.5236	29.3709
												Minimum	32.0236	18.8807	33.9994	23.6197
