# Supplementary material for: Apical contacts stemming from incomplete delamination guide progenitor cell allocation through a dragging mechanism
Source: eLife. 2021 Aug 27;10:e66483. doi: 10.7554/eLife.66483 (PMC8460252; doi:10.7554/eLife.66483)
Supplement: Figure 5—source data 1. [file elife-66483-fig5-data1.xlsx]

## Sheet: Fig5B-C attached
Attached DFC cells
Embryo (colored row)	Cell ID	Track number	Time (min)	X position (mm)	Y position (mm)	Relative X position (mm)	relative Y position (mm)
1	1	1	3.1	21.048	131.935	0	0
1	1	2	6.2	25.155	141.689	4.107	9.754
1	1	3	9.3	31.829	150.416	10.781	18.481
1	1	4	12.4	35.422	155.037	14.374	23.102
1	1	5	15.5	45.176	161.197	24.128	29.262
1	1	6	18.6	46.716	166.331	25.668	34.396
1	1	7	21.7	49.797	173.518	28.749	41.583
1	1	8	24.8	55.444	178.651	34.396	46.716
1	1	9	27.9	60.064	186.352	39.016	54.417
1	1	10	31	63.657	193.026	42.609	61.091
1	1	11	34.1	67.251	199.699	46.203	67.764
1	1	12	37.2	72.898	206.887	51.85	74.952
1	1	13	40.3	77.005	212.534	55.957	80.599
1	1	14	43.4	81.112	219.207	60.064	87.272
1	1	15	46.5	86.246	224.341	65.198	92.406
1	1	16	49.6	93.433	230.501	72.385	98.566
2	2	1	5	422.5	177.625	0	0
2	2	2	10	418.907	185.839	-3.593	8.214
2	2	3	15	416.853	193.539	-5.647	15.914
2	2	4	20	413.773	202.78	-8.727	25.155
2	2	5	25	409.666	209.453	-12.834	31.828
2	2	6	30	406.586	217.154	-15.914	39.529
2	2	7	35	404.019	224.854	-18.481	47.229
2	2	8	40	402.479	229.988	-20.021	52.363
2	2	9	45	396.319	238.715	-26.181	61.09
2	2	10	50	391.185	246.929	-31.315	69.304
2	2	11	55	387.591	253.603	-34.909	75.978
2	2	12	60	382.971	264.384	-39.529	86.759
2	3	13	65	380.918	271.571	-41.582	93.946
2	3	1	5	352.169	104.727	0	0
2	3	2	10	352.169	114.481	0	9.754
2	3	3	15	350.116	118.074	-2.053	13.347
2	3	4	20	348.062	122.695	-4.107	17.968
2	3	5	25	347.036	128.342	-5.133	23.615
2	3	6	30	342.929	140.149	-9.24	35.422
2	3	7	35	339.848	147.336	-12.321	42.609
2	3	8	40	337.795	153.496	-14.374	48.769
2	3	9	45	335.742	158.117	-16.427	53.39
2	3	10	50	331.635	164.277	-20.534	59.55
2	3	11	55	329.581	168.384	-22.588	63.657
2	3	12	60	326.501	173.004	-25.668	68.277
2	3	13	65	326.501	179.165	-25.668	74.438
2	4	1	5	408.64	155.037	0	0
2	4	2	10	405.559	159.657	-3.081	4.62
2	4	3	15	404.019	165.817	-4.621	10.78
2	4	4	20	399.912	173.518	-8.728	18.481
2	4	5	25	398.372	181.732	-10.268	26.695
2	4	6	30	396.832	188.405	-11.808	33.368
2	4	7	35	393.239	194.566	-15.401	39.529
2	4	8	40	390.672	201.753	-17.968	46.716
2	4	9	45	387.078	207.4	-21.562	52.363
2	4	10	50	384.511	212.534	-24.129	57.497
2	4	11	55	383.485	217.154	-25.155	62.117
2	4	12	60	380.918	222.801	-27.722	67.764
2	4	13	65	379.378	229.475	-29.262	74.438
3	5	1	4.18333	388.105	296.726	0	0
3	5	2	8.36667	383.998	301.859	-4.107	5.133
3	5	3	12.55	379.891	308.02	-8.214	11.294
3	5	4	16.7333	381.431	315.72	-6.674	18.994
3	5	5	20.9167	376.297	322.907	-11.808	26.181
3	5	6	25.1	372.191	331.635	-15.914	34.909
3	5	7	29.2833	371.677	341.389	-16.428	44.663
3	5	8	33.4667	370.137	348.062	-17.968	51.336
3	5	9	37.65	367.57	354.223	-20.535	57.497
3	5	10	41.8333	364.49	362.437	-23.615	65.711
3	5	11	46.0167	360.383	371.164	-27.722	74.438
3	5	12	50.2	359.87	374.757	-28.235	78.031
3	5	13	54.3833	356.276	380.404	-31.829	83.678
3	5	14	58.5667	353.196	385.538	-34.909	88.812
3	5	15	62.75	349.602	390.672	-38.503	93.946
3	6	1	4.18333	333.688	194.052	0	0
3	6	2	8.36667	332.148	198.673	-1.54	4.621
3	6	3	12.55	331.121	204.32	-2.567	10.268
3	6	4	16.7333	330.094	210.994	-3.594	16.942
3	6	5	20.9167	328.554	217.154	-5.134	23.102
3	6	6	25.1	324.961	224.341	-8.727	30.289
3	6	7	29.2833	323.934	226.908	-9.754	32.856
3	6	8	33.4667	323.421	231.528	-10.267	37.476
3	6	9	37.65	322.394	237.175	-11.294	43.123
3	6	10	41.8333	321.881	245.902	-11.807	51.85
3	6	11	46.0167	321.881	250.009	-11.807	55.957
3	6	12	50.2	320.341	255.656	-13.347	61.604
3	6	13	54.3833	318.8	262.844	-14.888	68.792
3	6	14	58.5667	316.234	267.977	-17.454	73.925
3	6	15	62.75	312.127	274.651	-21.561	80.599
4	7	1	2.33333	44.667	81.256	0	0
4	7	2	4.66667	47.518	85.532	2.851	4.276
4	7	3	7	50.369	89.809	5.702	8.553
4	7	4	9.33333	51.319	93.61	6.652	12.354
4	7	5	11.6667	52.745	98.362	8.078	17.106
4	7	6	14	53.22	104.064	8.553	22.808
4	7	7	16.3333	53.695	108.816	9.028	27.56
4	7	8	18.6667	52.27	112.142	7.603	30.886
4	7	9	21	54.17	116.894	9.503	35.638
4	7	10	23.3333	52.745	119.27	8.078	38.014
4	7	11	25.6667	54.17	124.022	9.503	42.766
4	7	12	28	54.646	127.348	9.979	46.092
4	7	13	30.3333	57.972	130.674	13.305	49.418
4	7	14	32.6667	59.397	133.05	14.73	51.794
4	7	15	35	60.348	136.377	15.681	55.121
4	7	16	37.3333	62.249	138.277	17.582	57.021
4	7	17	39.6667	64.149	139.703	19.482	58.447
4	7	18	42	66.525	143.029	21.858	61.773
4	7	19	44.3333	66.525	145.88	21.858	64.624
4	7	20	46.6667	66.05	150.157	21.383	68.901
4	7	21	49	65.1	152.533	20.433	71.277
4	7	22	51.3333	66.05	156.809	21.383	75.553
4	7	23	53.6667	67	160.136	22.333	78.88
4	7	24	56	68.901	164.887	24.234	83.631
4	7	25	58.3333	71.277	169.639	26.61	88.383
4	7	26	60.6667	72.702	173.916	28.035	92.66
4	8	1	2.33333	59.397	71.277	0	0
4	8	2	4.66667	58.922	76.504	-0.475	5.227
4	8	3	7	62.724	81.256	3.327	9.979
4	8	4	9.33333	63.199	83.632	3.802	12.355
4	8	5	11.6667	65.1	86.007	5.703	14.73
4	8	6	14	64.624	88.859	5.227	17.582
4	8	7	16.3333	66.525	95.986	7.128	24.709
4	8	8	18.6667	67	100.263	7.603	28.986
4	8	9	21	68.426	104.539	9.029	33.262
4	8	10	23.3333	68.426	109.766	9.029	38.489
4	8	11	25.6667	70.802	115.469	11.405	44.192
4	8	12	28	73.653	119.27	14.256	47.993
4	8	13	30.3333	73.653	123.072	14.256	51.795
4	8	14	32.6667	75.554	127.823	16.157	56.546
4	8	15	35	80.305	131.15	20.908	59.873
4	8	16	37.3333	81.256	133.525	21.859	62.248
4	8	17	39.6667	84.582	137.327	25.185	66.05
4	8	18	42	86.007	142.079	26.61	70.802
4	8	19	44.3333	86.007	144.93	26.61	73.653
4	8	20	46.6667	86.958	147.781	27.561	76.504
4	8	21	49	87.908	151.582	28.511	80.305
4	8	22	51.3333	87.908	154.909	28.511	83.632
4	8	23	53.6667	89.334	160.136	29.937	88.859
4	8	24	56	88.859	164.887	29.462	93.61
4	8	25	58.3333	89.809	169.164	30.412	97.887
4	8	26	60.6667	92.66	173.441	33.263	102.164
4	9	1	2.33333	93.135	77.929	0	0
4	9	2	4.66667	96.937	82.206	3.802	4.277
4	9	3	7	99.788	86.483	6.653	8.554
4	9	4	9.33333	101.213	88.859	8.078	10.93
4	9	5	11.6667	103.589	91.71	10.454	13.781
4	9	6	14	106.915	94.086	13.78	16.157
4	9	7	16.3333	106.915	98.837	13.78	20.908
4	9	8	18.6667	107.391	101.213	14.256	23.284
4	9	9	21	105.965	106.44	12.83	28.511
4	9	10	23.3333	106.44	110.242	13.305	32.313
4	9	11	25.6667	106.915	115.944	13.78	38.015
4	9	12	28	106.915	120.22	13.78	42.291
4	9	13	30.3333	112.142	123.547	19.007	45.618
4	9	14	32.6667	113.568	125.923	20.433	47.994
4	9	15	35	114.993	128.774	21.858	50.845
4	9	16	37.3333	115.944	133.05	22.809	55.121
4	9	17	39.6667	118.32	136.852	25.185	58.923
4	9	18	42	121.646	141.604	28.511	63.675
4	9	19	44.3333	119.27	147.781	26.135	69.852
4	9	20	46.6667	120.22	151.582	27.085	73.653
4	9	21	49	120.696	155.384	27.561	77.455
4	9	22	51.3333	118.795	160.611	25.66	82.682
4	9	23	53.6667	120.22	162.511	27.085	84.582
4	9	24	56	120.22	166.313	27.085	88.384
4	9	25	58.3333	119.27	171.54	26.135	93.611
4	9	26	60.6667	120.696	176.767	27.561	98.838
5	10	1	2.5	126.424	215.846	0	0
5	10	2	5	128.994	220.986	2.57	5.14
5	10	3	7.5	131.05	229.722	4.626	13.876
5	10	4	10	130.022	236.917	3.598	21.071
5	10	5	12.5	131.564	240.515	5.14	24.669
5	10	6	15	132.077	246.168	5.653	30.322
5	10	7	17.5	134.133	252.849	7.709	37.003
5	10	8	20	135.161	259.53	8.737	43.684
5	10	9	22.5	136.703	263.641	10.279	47.795
5	10	10	25	137.731	269.808	11.307	53.962
5	10	11	27.5	142.356	274.433	15.932	58.587
5	10	12	30	144.412	281.628	17.988	65.782
5	10	13	32.5	146.467	288.309	20.043	72.463
5	10	14	35	147.495	292.934	21.071	77.088
5	10	15	37.5	150.579	299.615	24.155	83.769
5	10	16	40	153.662	305.268	27.238	89.422
5	10	17	42.5	155.718	310.922	29.294	95.076
5	10	18	45	158.801	316.061	32.377	100.215
5	10	19	47.5	160.343	323.256	33.919	107.41
5	10	20	50	163.427	329.423	37.003	113.577
5	10	21	52.5	164.968	336.618	38.544	120.772
5	10	22	55	165.996	343.812	39.572	127.966
5	11	1	2.5	370.536	201.457	0	0
5	11	2	5	368.481	208.652	-2.055	7.195
5	11	3	7.5	367.453	216.874	-3.083	15.417
5	11	4	10	365.911	224.583	-4.625	23.126
5	11	5	12.5	363.341	233.834	-7.195	32.377
5	11	6	15	361.286	241.028	-9.25	39.571
5	11	7	17.5	357.688	246.168	-12.848	44.711
5	11	8	20	355.633	250.793	-14.903	49.336
5	11	9	22.5	355.119	257.474	-15.417	56.017
5	11	10	25	354.605	262.099	-15.931	60.642
5	11	11	27.5	354.605	269.808	-15.931	68.351
5	11	12	30	355.119	276.489	-15.417	75.032
5	11	13	32.5	353.577	281.114	-16.959	79.657
5	11	14	35	353.063	285.74	-17.473	84.283
5	11	15	37.5	350.493	291.393	-20.043	89.936
5	11	16	40	348.952	297.046	-21.584	95.589
5	11	17	42.5	347.41	303.213	-23.126	101.756
5	11	18	45	345.868	307.324	-24.668	105.867
5	11	19	47.5	343.812	311.949	-26.724	110.492
5	11	20	50	341.757	316.575	-28.779	115.118
5	11	21	52.5	340.729	320.172	-29.807	118.715
5	11	22	55	340.215	327.367	-30.321	125.91
6	12	1	6.33333	635.517	298.181	0	0
6	12	2	12.6667	632.505	304.205	-3.012	6.024
6	12	3	19	628.489	312.237	-7.028	14.056
6	12	4	25.3333	623.469	326.292	-12.048	28.111
6	12	5	31.6667	616.441	343.36	-19.076	45.179
6	12	6	38	610.417	360.427	-25.1	62.246
6	12	7	44.3333	602.386	372.475	-33.131	74.294
6	12	8	50.6667	596.362	387.535	-39.155	89.354
6	12	9	57	593.35	399.582	-42.167	101.401
6	12	10	63.3333	590.338	411.63	-45.179	113.449
6	13	1	6.33333	289.145	228.907	0	0
6	13	2	12.6667	292.157	242.962	3.012	14.055
6	13	3	19	293.161	253.002	4.016	24.095
6	13	4	25.3333	296.173	267.058	7.028	38.151
6	13	5	31.6667	300.189	282.117	11.044	53.21
6	13	6	38	300.189	288.141	11.044	59.234
6	13	7	44.3333	301.193	301.193	12.048	72.286
6	13	8	50.6667	303.201	311.233	14.056	82.326
6	13	9	57	303.201	322.276	14.056	93.369
6	13	10	63.3333	303.201	338.34	14.056	109.433
7	14	1	3	106.417	212.833	0	0
7	14	2	6	109.625	218.181	3.208	5.348
7	14	3	9	111.764	224.063	5.347	11.23
7	14	4	12	111.764	227.806	5.347	14.973
7	14	5	15	113.368	232.619	6.951	19.786
7	14	6	18	115.507	238.501	9.09	25.668
7	14	7	21	117.646	241.71	11.229	28.877
7	14	8	24	119.251	244.918	12.834	32.085
7	14	9	27	120.855	249.731	14.438	36.898
7	14	10	30	122.459	255.079	16.042	42.246
7	14	11	33	124.063	259.357	17.646	46.524
7	14	12	36	124.063	262.565	17.646	49.732
7	14	13	39	124.598	268.982	18.181	56.149
7	14	14	42	124.598	273.261	18.181	60.428
7	14	15	45	125.668	278.073	19.251	65.24
7	14	16	48	126.737	283.421	20.32	70.588
7	14	17	51	127.272	287.699	20.855	74.866
7	14	18	54	127.807	291.442	21.39	78.609
7	14	19	57	128.876	296.255	22.459	83.422
7	14	20	60	129.411	301.068	22.994	88.235
7	15	1	3	88.235	205.346	0	0
7	15	2	6	90.909	211.229	2.674	5.883
7	15	3	9	91.978	215.507	3.743	10.161
7	15	4	12	92.513	218.715	4.278	13.369
7	15	5	15	93.048	224.598	4.813	19.252
7	15	6	18	94.117	228.341	5.882	22.995
7	15	7	21	95.721	231.55	7.486	26.204
7	15	8	24	97.326	236.362	9.091	31.016
7	15	9	27	99.465	242.245	11.23	36.899
7	15	10	30	102.673	243.849	14.438	38.503
7	15	11	33	105.882	249.196	17.647	43.85
7	15	12	36	106.951	252.94	18.716	47.594
7	15	13	39	106.951	256.683	18.716	51.337
7	15	14	42	106.951	259.892	18.716	54.546
7	15	15	45	106.951	265.774	18.716	60.428
7	15	16	48	108.021	271.656	19.786	66.31
7	15	17	51	107.486	274.33	19.251	68.984
7	15	18	54	107.486	278.073	19.251	72.727
7	15	19	57	108.021	282.886	19.786	77.54
7	15	20	60	108.021	287.164	19.786	81.818
8	16	1	4.8	295.72	129.946	0	0
8	16	2	9.6	291.442	137.967	-4.278	8.021
8	16	3	14.4	288.234	147.593	-7.486	17.647
8	16	4	19.2	288.234	154.01	-7.486	24.064
8	16	5	24	286.629	162.031	-9.091	32.085
8	16	6	28.8	285.025	170.587	-10.695	40.641
8	16	7	33.6	283.956	177.004	-11.764	47.058
8	16	8	38.4	282.351	182.352	-13.369	52.406
8	16	9	43.2	279.143	189.839	-16.577	59.893
8	16	10	48	276.469	195.186	-19.251	65.24
8	16	11	52.8	275.4	203.207	-20.32	73.261
8	16	12	57.6	274.865	209.09	-20.855	79.144
8	16	13	62.4	274.33	213.368	-21.39	83.422
8	17	1	4.8	275.934	122.459	0	0
8	17	2	9.6	274.865	131.015	-1.069	8.556
8	17	3	14.4	273.795	137.432	-2.139	14.973
8	17	4	19.2	272.191	145.989	-3.743	23.53
8	17	5	24	271.122	155.614	-4.812	33.155
8	17	6	28.8	270.052	164.17	-5.882	41.711
8	17	7	33.6	270.052	166.844	-5.882	44.385
8	17	8	38.4	268.448	174.331	-7.486	51.872
8	17	9	43.2	266.843	182.887	-9.091	60.428
8	17	10	48	264.17	188.769	-11.764	66.31
8	17	11	52.8	264.17	194.117	-11.764	71.658
8	17	12	57.6	262.031	201.603	-13.903	79.144
8	17	13	62.4	261.496	206.951	-14.438	84.492

## Sheet: Fig5B-C detachd
Detached DFC cells
Embryo (colored row)	Cell ID	Track number	Time (min)	X position (mm)	Y position (mm)	Relative X position (mm)	relative Y position (mm)
1	1	1	1.1	104.167	75.521	0	0
1	1	2	2.2	104.687	76.042	0.52	0.521
1	1	3	3.3	104.687	76.042	0.52	0.521
1	1	4	4.4	105.208	77.083	1.041	1.562
1	1	5	5.5	104.687	78.125	0.52	2.604
1	1	6	6.6	103.125	78.646	-1.042	3.125
1	1	7	7.7	102.604	79.167	-1.563	3.646
1	1	8	8.8	102.604	80.729	-1.563	5.208
1	1	9	9.9	101.042	79.687	-3.125	4.166
1	1	10	11	100.521	78.646	-3.646	3.125
1	1	11	12.1	100.521	79.167	-3.646	3.646
1	1	12	13.2	100.521	80.208	-3.646	4.687
1	1	13	14.3	100	81.25	-4.167	5.729
1	1	14	15.4	103.125	80.729	-1.042	5.208
1	1	15	16.5	103.646	82.292	-0.521	6.771
1	1	16	17.6	103.646	81.25	-0.521	5.729
1	1	17	18.7	103.646	81.25	-0.521	5.729
1	1	18	19.8	105.729	81.771	1.562	6.25
1	1	19	20.9	104.167	82.812	0	7.291
1	1	20	22	105.729	82.292	1.562	6.771
1	1	21	23.1	106.25	82.292	2.083	6.771
1	1	22	24.2	108.333	81.25	4.166	5.729
1	1	23	25.3	107.812	81.771	3.645	6.25
1	1	24	26.4	108.333	83.854	4.166	8.333
1	1	25	27.5	105.208	84.375	1.041	8.854
1	1	26	28.6	106.771	85.417	2.604	9.896
1	1	27	29.7	103.125	88.542	-1.042	13.021
1	1	28	30.8	102.604	89.062	-1.563	13.541
1	1	29	31.9	100.521	90.104	-3.646	14.583
1	1	30	33	100.521	90.104	-3.646	14.583
1	1	31	34.1	100.521	90.625	-3.646	15.104
1	1	32	35.2	102.604	92.708	-1.563	17.187
1	1	33	36.3	105.729	90.625	1.562	15.104
1	1	34	37.4	100	92.187	-4.167	16.666
1	1	35	38.5	103.125	92.187	-1.042	16.666
1	1	36	39.6	103.646	92.187	-0.521	16.666
1	1	37	40.7	99.479	93.229	-4.688	17.708
1	1	38	41.8	105.208	92.708	1.041	17.187
1	1	39	42.9	102.083	93.229	-2.084	17.708
1	1	40	44	98.958	94.271	-5.209	18.75
1	1	41	45.1	103.125	94.271	-1.042	18.75
1	1	42	46.2	104.167	93.229	0	17.708
1	1	43	47.3	102.604	93.75	-1.563	18.229
1	1	44	48.4	99.479	93.75	-4.688	18.229
1	1	45	49.5	102.604	94.271	-1.563	18.75
1	1	46	50.6	100	94.271	-4.167	18.75
1	1	47	51.7	96.354	93.229	-7.813	17.708
1	1	48	52.8	93.229	94.792	-10.938	19.271
1	1	49	53.9	84.896	93.229	-19.271	17.708
1	1	50	55	78.646	90.625	-25.521	15.104
1	1	51	56.1	77.083	85.417	-27.084	9.896
1	1	52	57.2	76.042	85.417	-28.125	9.896
1	1	53	58.3	78.125	84.375	-26.042	8.854
1	1	54	59.4	73.958	82.812	-30.209	7.291
1	1	55	60.5	72.917	83.333	-31.25	7.812
1	2	1	1.1	151.042	80.208	0	0
1	2	2	2.2	152.083	81.771	1.041	1.563
1	2	3	3.3	154.687	81.771	3.645	1.563
1	2	4	4.4	153.646	83.333	2.604	3.125
1	2	5	5.5	150.521	83.854	-0.521	3.646
1	2	6	6.6	151.562	80.729	0.52	0.521
1	2	7	7.7	149.479	82.812	-1.563	2.604
1	2	8	8.8	149.479	82.812	-1.563	2.604
1	2	9	9.9	147.396	82.812	-3.646	2.604
1	2	10	11	144.792	85.417	-6.25	5.209
1	2	11	12.1	142.187	85.417	-8.855	5.209
1	2	12	13.2	139.583	85.417	-11.459	5.209
1	2	13	14.3	134.896	84.896	-16.146	4.688
1	2	14	15.4	133.854	81.771	-17.188	1.563
1	2	15	16.5	131.25	82.812	-19.792	2.604
1	2	16	17.6	129.167	80.208	-21.875	0
1	2	17	18.7	126.042	79.167	-25	-1.041
1	2	18	19.8	122.396	78.646	-28.646	-1.562
1	2	19	20.9	121.875	77.083	-29.167	-3.125
1	2	20	22	121.875	77.083	-29.167	-3.125
1	2	21	23.1	121.875	77.083	-29.167	-3.125
1	2	22	24.2	123.958	76.562	-27.084	-3.646
1	2	23	25.3	124.479	78.125	-26.563	-2.083
1	2	24	26.4	123.958	80.729	-27.084	0.521
1	2	25	27.5	125.521	83.854	-25.521	3.646
1	2	26	28.6	127.604	85.937	-23.438	5.729
1	2	27	29.7	125.521	88.021	-25.521	7.813
1	2	28	30.8	128.125	88.542	-22.917	8.334
1	2	29	31.9	127.604	91.667	-23.438	11.459
1	2	30	33	126.042	92.708	-25	12.5
1	2	31	34.1	126.042	94.271	-25	14.063
1	2	32	35.2	125.521	95.833	-25.521	15.625
1	2	33	36.3	126.042	97.917	-25	17.709
1	2	34	37.4	125	97.917	-26.042	17.709
1	2	35	38.5	125	100.521	-26.042	20.313
1	2	36	39.6	121.354	100	-29.688	19.792
1	2	37	40.7	122.396	99.479	-28.646	19.271
1	2	38	41.8	123.437	102.083	-27.605	21.875
1	2	39	42.9	121.875	97.396	-29.167	17.188
1	2	40	44	124.479	101.562	-26.563	21.354
1	2	41	45.1	124.479	97.917	-26.563	17.709
1	2	42	46.2	125.521	100.521	-25.521	20.313
1	2	43	47.3	126.042	98.437	-25	18.229
1	2	44	48.4	126.562	99.479	-24.48	19.271
1	2	45	49.5	128.646	99.479	-22.396	19.271
1	2	46	50.6	128.646	100	-22.396	19.792
1	2	47	51.7	132.292	96.875	-18.75	16.667
1	2	48	52.8	136.458	93.229	-14.584	13.021
1	2	49	53.9	137.5	92.708	-13.542	12.5
1	2	50	55	137.5	91.667	-13.542	11.459
1	2	51	56.1	138.021	92.187	-13.021	11.979
1	2	52	57.2	140.104	92.708	-10.938	12.5
1	2	53	58.3	139.583	92.708	-11.459	12.5
1	2	54	59.4	139.583	92.708	-11.459	12.5
1	2	55	60.5	140.625	93.229	-10.417	13.021
2	3	1	1.5	201.562	126.562	0	0
2	3	2	3	203.125	127.604	1.563	1.042
2	3	3	4.5	205.729	130.208	4.167	3.646
2	3	4	6	205.729	131.25	4.167	4.688
2	3	5	7.5	204.687	133.333	3.125	6.771
2	3	6	9	204.167	133.854	2.605	7.292
2	3	7	10.5	206.771	135.417	5.209	8.855
2	3	8	12	207.812	135.937	6.25	9.375
2	3	9	13.5	205.729	140.625	4.167	14.063
2	3	10	15	202.604	143.229	1.042	16.667
2	3	11	16.5	205.208	146.354	3.646	19.792
2	3	12	18	207.292	144.792	5.73	18.23
2	3	13	19.5	207.812	147.396	6.25	20.834
2	3	14	21	205.729	150	4.167	23.438
2	3	15	22.5	203.646	150	2.084	23.438
2	3	16	24	203.125	152.083	1.563	25.521
2	3	17	25.5	206.771	156.25	5.209	29.688
2	3	18	27	209.375	159.375	7.813	32.813
2	3	19	28.5	212.5	162.5	10.938	35.938
2	3	20	30	210.937	166.146	9.375	39.584
2	3	21	31.5	208.333	167.187	6.771	40.625
2	3	22	33	206.25	170.312	4.688	43.75
2	3	23	34.5	210.417	173.437	8.855	46.875
2	3	24	36	211.979	172.917	10.417	46.355
2	3	25	37.5	213.021	171.354	11.459	44.792
2	3	26	39	213.542	170.312	11.98	43.75
2	3	27	40.5	210.937	175.521	9.375	48.959
2	3	28	42	207.812	178.646	6.25	52.084
2	3	29	43.5	209.896	183.333	8.334	56.771
2	3	30	45	211.979	183.333	10.417	56.771
2	3	31	46.5	213.542	183.333	11.98	56.771
2	3	32	48	209.375	186.458	7.813	59.896
2	3	33	49.5	209.375	190.625	7.813	64.063
2	3	34	51	206.25	187.5	4.688	60.938
2	3	35	52.5	206.25	186.458	4.688	59.896
2	3	36	54	206.25	186.458	4.688	59.896
2	3	37	55.5	209.375	189.583	7.813	63.021
2	3	38	57	209.375	196.875	7.813	70.313
2	3	39	58.5	214.583	196.875	13.021	70.313
2	3	40	60	215.625	195.833	14.063	69.271
2	4	1	1.5	219.271	100	0	0
2	4	2	3	221.875	100	2.604	0
2	4	3	4.5	225.521	102.083	6.25	2.083
2	4	4	6	227.083	101.042	7.812	1.042
2	4	5	7.5	228.646	99.479	9.375	-0.521
2	4	6	9	229.687	100	10.416	0
2	4	7	10.5	228.125	99.479	8.854	-0.521
2	4	8	12	226.562	99.479	7.291	-0.521
2	4	9	13.5	229.687	98.958	10.416	-1.042
2	4	10	15	229.687	100.521	10.416	0.521
2	4	11	16.5	225.521	98.437	6.25	-1.563
2	4	12	18	225	97.396	5.729	-2.604
2	4	13	19.5	226.042	95.312	6.771	-4.688
2	4	14	21	229.167	94.792	9.896	-5.208
2	4	15	22.5	232.292	96.875	13.021	-3.125
2	4	16	24	233.854	101.042	14.583	1.042
2	4	17	25.5	235.417	100.521	16.146	0.521
2	4	18	27	233.854	98.437	14.583	-1.563
2	4	19	28.5	232.812	103.646	13.541	3.646
2	4	20	30	235.937	105.729	16.666	5.729
2	4	21	31.5	236.458	106.25	17.187	6.25
2	4	22	33	234.896	106.25	15.625	6.25
2	4	23	34.5	234.896	109.375	15.625	9.375
2	4	24	36	234.896	110.937	15.625	10.937
2	4	25	37.5	231.771	110.937	12.5	10.937
2	4	26	39	229.167	110.417	9.896	10.417
2	4	27	40.5	228.646	113.542	9.375	13.542
2	4	28	42	229.167	118.75	9.896	18.75
2	4	29	43.5	232.812	119.271	13.541	19.271
2	4	30	45	235.417	118.229	16.146	18.229
2	4	31	46.5	239.062	114.583	19.791	14.583
2	4	32	48	238.542	114.583	19.271	14.583
2	4	33	49.5	235.937	114.062	16.666	14.062
2	4	34	51	235.417	115.104	16.146	15.104
2	4	35	52.5	236.979	117.187	17.708	17.187
2	4	36	54	240.104	118.75	20.833	18.75
2	4	37	55.5	239.062	121.354	19.791	21.354
2	4	38	57	240.104	122.917	20.833	22.917
2	4	39	58.5	238.021	122.917	18.75	22.917
2	4	40	60	235.937	126.042	16.666	26.042
3	5	1	3.1	123.208	273.624	0	0
3	5	2	6.2	125.775	277.731	2.567	4.107
3	5	3	9.3	126.801	281.325	3.593	7.701
3	5	4	12.4	129.882	285.945	6.674	12.321
3	5	5	15.5	127.828	292.619	4.62	18.995
3	5	6	18.6	130.908	292.105	7.7	18.481
3	5	7	21.7	133.475	291.592	10.267	17.968
3	5	8	24.8	136.555	295.699	13.347	22.075
3	5	9	27.9	137.069	299.293	13.861	25.669
3	5	10	31	140.149	302.886	16.941	29.262
3	5	11	34.1	143.743	301.859	20.535	28.235
3	5	12	37.2	148.363	303.399	25.155	29.775
3	5	13	40.3	153.496	303.913	30.288	30.289
3	5	14	43.4	155.55	305.453	32.342	31.829
3	5	15	46.5	154.01	308.02	30.802	34.396
3	5	16	49.6	154.01	312.127	30.802	38.503
3	5	17	52.7	155.55	316.747	32.342	43.123
3	5	18	55.8	159.657	322.394	36.449	48.77
3	5	19	58.9	163.764	320.341	40.556	46.717
3	6	1	3.1	151.956	346.009	0	0
3	6	2	6.2	152.983	353.709	1.027	7.7
3	6	3	9.3	155.037	360.383	3.081	14.374
3	6	4	12.4	152.47	367.57	0.514	21.561
3	6	5	15.5	151.956	375.271	0	29.262
3	6	6	18.6	156.577	378.351	4.621	32.342
3	6	7	21.7	157.09	385.538	5.134	39.529
3	6	8	24.8	160.684	394.265	8.728	48.256
3	6	9	27.9	163.764	403.506	11.808	57.497
3	6	10	31	167.871	408.126	15.915	62.117
3	6	11	34.1	173.004	412.233	21.048	66.224
3	6	12	37.2	176.598	414.287	24.642	68.278
3	6	13	40.3	187.892	417.367	35.936	71.358
3	6	14	43.4	190.459	421.474	38.503	75.465
3	6	15	46.5	192.512	426.094	40.556	80.085
3	6	16	49.6	196.106	428.147	44.15	82.138
3	6	17	52.7	204.32	430.714	52.364	84.705
3	6	18	55.8	209.967	433.794	58.011	87.785
3	6	19	58.9	215.614	438.415	63.658	92.406
3	7	1	3.1	92.997	184.943	0	0
3	7	2	6.2	95.099	188.096	2.102	3.153
3	7	3	9.3	96.149	190.197	3.152	5.254
3	7	4	12.4	100.353	194.401	7.356	9.458
3	7	5	15.5	100.353	199.129	7.356	14.186
3	7	6	18.6	100.878	205.434	7.881	20.491
3	7	7	21.7	97.726	209.112	4.729	24.169
3	7	8	24.8	92.997	213.841	0	28.898
3	7	9	27.9	89.319	218.044	-3.678	33.101
3	7	10	31	90.37	222.772	-2.627	37.829
3	7	11	34.1	91.421	228.552	-1.576	43.609
3	7	12	37.2	90.37	232.23	-2.627	47.287
3	7	13	40.3	89.845	235.382	-3.152	50.439
3	7	14	43.4	92.997	239.585	0	54.642
3	7	15	46.5	96.675	241.687	3.678	56.744
3	7	16	49.6	100.353	242.213	7.356	57.27
3	7	17	52.7	101.929	249.043	8.932	64.1
3	7	18	55.8	104.556	254.297	11.559	69.354
3	7	19	58.9	106.658	260.076	13.661	75.133
3	8	1	3.1	107.708	178.113	0	0
3	8	2	6.2	109.81	180.215	2.102	2.102
3	8	3	9.3	110.335	183.892	2.627	5.779
3	8	4	12.4	110.335	183.367	2.627	5.254
3	8	5	15.5	112.437	187.045	4.729	8.932
3	8	6	18.6	111.912	191.248	4.204	13.135
3	8	7	21.7	109.81	197.028	2.102	18.915
3	8	8	24.8	109.285	204.909	1.577	26.796
3	8	9	27.9	107.183	208.061	-0.525	29.948
3	8	10	31	105.607	215.942	-2.101	37.829
3	8	11	34.1	108.759	218.569	1.051	40.456
3	8	12	37.2	114.013	220.671	6.305	42.558
3	8	13	40.3	117.691	225.4	9.983	47.287
3	8	14	43.4	119.267	223.298	11.559	45.185
3	8	15	46.5	123.996	226.976	16.288	48.863
3	8	16	49.6	124.521	232.755	16.813	54.642
3	8	17	52.7	129.25	235.382	21.542	57.269
3	8	18	55.8	125.572	239.585	17.864	61.472
3	8	19	58.9	125.047	245.365	17.339	67.252
4	9	1	4.58333	86.759	82.652	0	0
4	9	2	9.16667	84.192	87.272	-2.567	4.62
4	9	3	13.75	75.978	92.919	-10.781	10.267
4	9	4	18.3333	71.358	95.486	-15.401	12.834
4	9	5	22.9167	67.251	101.133	-19.508	18.481
4	9	6	27.5	58.524	100.106	-28.235	17.454
4	9	7	32.0833	52.363	107.294	-34.396	24.642
4	9	8	36.6667	48.77	108.834	-37.989	26.182
4	9	9	41.25	48.77	105.24	-37.989	22.588
4	9	10	45.8333	50.31	110.374	-36.449	27.722
4	9	11	50.4167	42.609	114.481	-44.15	31.829
4	9	12	55	36.962	119.101	-49.797	36.449
4	9	13	59.5833	25.668	125.775	-61.091	43.123
4	10	1	4.58333	340.875	113.454	0	0
4	10	2	9.16667	341.389	125.261	0.514	11.807
4	10	3	13.75	340.875	132.448	0	18.994
4	10	4	18.3333	340.875	139.122	0	25.668
4	10	5	22.9167	348.062	147.336	7.187	33.882
4	10	6	27.5	360.383	146.823	19.508	33.369
4	10	7	32.0833	367.057	147.849	26.182	34.395
4	10	8	36.6667	372.704	151.956	31.829	38.502
4	10	9	41.25	376.811	157.603	35.936	44.149
4	10	10	45.8333	388.105	165.304	47.23	51.85
4	10	11	50.4167	394.779	168.897	53.904	55.443
4	10	12	55	401.452	177.625	60.577	64.171
4	10	13	59.5833	400.426	185.325	59.551	71.871
4	11	1	4.58333	401.452	240.255	0	0
4	11	2	9.16667	409.153	239.742	7.701	-0.513
4	11	3	13.75	416.853	243.849	15.401	3.594
4	11	4	18.3333	415.827	249.496	14.375	9.241
4	11	5	22.9167	415.313	254.116	13.861	13.861
4	11	6	27.5	410.18	256.683	8.728	16.428
4	11	7	32.0833	414.287	259.763	12.835	19.508
4	11	8	36.6667	417.367	262.33	15.915	22.075
4	11	9	41.25	424.04	277.218	22.588	36.963
4	11	10	45.8333	428.147	278.244	26.695	37.989
4	11	11	50.4167	432.254	278.244	30.802	37.989
4	11	12	55	433.794	278.758	32.342	38.503
4	11	13	59.5833	437.388	284.918	35.936	44.663
5	12	1	3.3	377.408	203.28	0	0
5	12	2	6.6	381.348	206.432	3.94	3.152
5	12	3	9.9	390.015	211.947	12.607	8.667
5	12	4	13.2	395.53	214.311	18.122	11.031
5	12	5	16.5	394.742	221.402	17.334	18.122
5	12	6	19.8	397.106	230.069	19.698	26.789
5	12	7	23.1	397.894	237.948	20.486	34.668
5	12	8	26.4	402.621	245.04	25.213	41.76
5	12	9	29.7	405.773	256.858	28.365	53.578
5	12	10	33	405.773	267.889	28.365	64.609
5	12	11	36.3	402.621	271.829	25.213	68.549
5	12	12	39.6	401.046	273.404	23.638	70.124
5	12	13	42.9	405.773	283.647	28.365	80.367
5	12	14	46.2	410.501	290.738	33.093	87.458
5	12	15	49.5	409.713	300.981	32.305	97.701
5	12	16	52.8	407.349	308.86	29.941	105.58
5	12	17	56.1	416.804	315.951	39.396	112.671
5	12	18	59.4	416.016	321.467	38.608	118.187
5	13	1	3.3	412.076	226.918	0	0
5	13	2	6.6	416.804	232.433	4.728	5.515
5	13	3	9.9	418.38	241.888	6.304	14.97
5	13	4	13.2	419.168	248.191	7.092	21.273
5	13	5	16.5	417.592	260.01	5.516	33.092
5	13	6	19.8	415.228	268.677	3.152	41.759
5	13	7	23.1	423.895	279.708	11.819	52.79
5	13	8	26.4	419.955	284.435	7.879	57.517
5	13	9	29.7	416.016	296.254	3.94	69.336
5	13	10	33	422.319	304.921	10.243	78.003
5	13	11	36.3	423.107	312.8	11.031	85.882
5	13	12	39.6	417.592	320.679	5.516	93.761
5	13	13	42.9	415.228	330.134	3.152	103.216
5	13	14	46.2	412.864	334.073	0.788	107.155
5	13	15	49.5	418.38	344.316	6.304	117.398
5	13	16	52.8	421.531	353.771	9.455	126.853
5	13	17	56.1	419.955	357.711	7.879	130.793
5	13	18	59.4	423.895	365.59	11.819	138.672
6	14	1	6.33333	460.825	229.911	0	0
6	14	2	12.6667	458.817	230.914	-2.008	1.003
6	14	3	19	456.809	235.934	-4.016	6.023
6	14	4	25.3333	444.761	229.911	-16.064	0
6	14	5	31.6667	436.73	224.891	-24.095	-5.02
6	14	6	38	427.694	214.851	-33.131	-15.06
6	14	7	44.3333	424.682	215.855	-36.143	-14.056
6	14	8	50.6667	416.65	215.855	-44.175	-14.056
6	15	1	6.33333	479.901	228.907	0	0
6	15	2	12.6667	478.897	231.918	-1.004	3.011
6	15	3	19	475.885	231.918	-4.016	3.011
6	15	4	25.3333	473.877	223.887	-6.024	-5.02
6	15	5	31.6667	473.877	220.875	-6.024	-8.032
6	15	6	38	467.853	213.847	-12.048	-15.06
6	15	7	44.3333	459.821	204.811	-20.08	-24.096
6	15	8	50.6667	450.785	197.783	-29.116	-31.124
7	16	1	3	279.143	184.491	0	0
7	16	2	6	279.143	185.026	0	0.535
7	16	3	9	279.143	185.026	0	0.535
7	16	4	12	276.469	185.56	-2.674	1.069
7	16	5	15	278.073	185.026	-1.07	0.535
7	16	6	18	278.073	180.213	-1.07	-4.278
7	16	7	21	284.49	179.678	5.347	-4.813
7	16	8	24	294.116	183.421	14.973	-1.07
7	16	9	27	302.137	185.56	22.994	1.069
7	16	10	30	305.346	186.63	26.203	2.139
7	16	11	33	298.929	190.373	19.786	5.882
7	16	12	36	298.394	193.047	19.251	8.556
7	16	13	39	299.998	196.79	20.855	12.299
7	16	14	42	304.811	196.79	25.668	12.299
7	16	15	45	310.159	199.464	31.016	14.973
7	16	16	48	313.367	205.881	34.224	21.39
7	16	17	51	310.159	210.694	31.016	26.203
7	16	18	54	308.02	209.09	28.877	24.599
7	16	19	57	308.02	216.576	28.877	32.085
7	16	20	60	310.693	219.25	31.55	34.759
7	17	1	3	270.052	171.657	0	0
7	17	2	6	271.122	172.726	1.07	1.069
7	17	3	9	268.982	175.4	-1.07	3.743
7	17	4	12	265.774	175.4	-4.278	3.743
7	17	5	15	266.843	172.726	-3.209	1.069
7	17	6	18	267.913	171.657	-2.139	0
7	17	7	21	271.122	170.587	1.07	-1.07
7	17	8	24	265.774	172.726	-4.278	1.069
7	17	9	27	262.565	173.796	-7.487	2.139
7	17	10	30	260.426	178.074	-9.626	6.417
7	17	11	33	258.287	182.352	-11.765	10.695
7	17	12	36	259.357	185.026	-10.695	13.369
7	17	13	39	260.961	191.443	-9.091	19.786
7	17	14	42	260.961	191.978	-9.091	20.321
7	17	15	45	265.774	196.256	-4.278	24.599
7	17	16	48	264.17	199.999	-5.882	28.342
7	17	17	51	263.635	199.464	-6.417	27.807
7	17	18	54	259.357	197.86	-10.695	26.203
7	17	19	57	261.496	199.999	-8.556	28.342
7	17	20	60	258.822	204.812	-11.23	33.155
8	18	1	4.8	99.465	89.304	0	0
8	18	2	9.6	99.465	91.443	0	2.139
8	18	3	14.4	98.395	97.326	-1.07	8.022
8	18	4	19.2	97.326	101.604	-2.139	12.3
8	18	5	24	94.117	101.069	-5.348	11.765
8	18	6	28.8	94.117	98.93	-5.348	9.626
8	18	7	33.6	94.117	90.374	-5.348	1.07
8	18	8	38.4	93.582	87.7	-5.883	-1.604
8	18	9	43.2	91.978	83.957	-7.487	-5.347
8	18	10	48	88.235	80.213	-11.23	-9.091
8	18	11	52.8	83.957	73.262	-15.508	-16.042
8	18	12	57.6	78.609	75.935	-20.856	-13.369
8	18	13	62.4	72.727	73.796	-26.738	-15.508
8	19	1	4.8	139.037	58.288	0	0
8	19	2	9.6	143.315	58.823	4.278	0.535
8	19	3	14.4	149.732	60.962	10.695	2.674
8	19	4	19.2	149.732	63.101	10.695	4.813
8	19	5	24	142.78	64.706	3.743	6.418
8	19	6	28.8	140.106	68.449	1.069	10.161
8	19	7	33.6	138.502	67.379	-0.535	9.091
8	19	8	38.4	131.55	64.171	-7.487	5.883
8	19	9	43.2	132.085	57.219	-6.952	-1.069
8	19	10	48	134.759	51.337	-4.278	-6.951
8	19	11	52.8	122.994	48.128	-16.043	-10.16
8	19	12	57.6	121.924	42.246	-17.113	-16.042
8	19	13	62.4	118.716	45.454	-20.321	-12.834
8	20	1	4.8	245.453	53.476	0	0
8	20	2	9.6	249.731	55.08	4.278	1.604
8	20	3	14.4	244.918	56.149	-0.535	2.673
8	20	4	19.2	241.175	62.032	-4.278	8.556
8	20	5	24	240.106	62.567	-5.347	9.091
8	20	6	28.8	239.571	63.101	-5.882	9.625
8	20	7	33.6	237.432	62.567	-8.021	9.091
8	20	8	38.4	231.55	62.032	-13.903	8.556
8	20	9	43.2	230.48	56.149	-14.973	2.673
8	20	10	48	226.202	57.754	-19.251	4.278
8	20	11	52.8	226.202	54.545	-19.251	1.069
8	20	12	57.6	224.598	51.871	-20.855	-1.605
8	20	13	62.4	224.598	42.781	-20.855	-10.695

## Sheet: Fig5D
	Attached DFC				Detached DFC			Descriptive Statistics		N Analysis	N Missing	Mean	Standard Deviation
Embryo (colored row)	Cell ID	Persistence		Embryo (colored row)	Cell ID	Persistence			Attached DFC	23	0	0.98275	0.00902
1	1	0.9835		1	1	0.3927			Detached DFC	20	0	0.57088	0.28435
1	1	0.9887		1	1	0.0176
1	1	0.9817		1	1	0.4162
1	1	0.9906		1	1	0.2746		Normality Test (Shapiro Wilk)		p-value	Decision at level(5%)
2	2	0.967		2	2	0.8046			Attached DFC	0.1012	Can't reject normality
2	2	0.9781		2	2	0.8294			Detached DFC	0.0361	Reject normality
3	3	0.9774		3	3	0.857
3	3	0.9889		3	3	0.8088
3	3	0.9866		4	4	0.7582		Kolmogorov-Smirnov test	D	Z	Exact Prob>|D|
4	4	0.9721		4	4	0.3699			1	3.27073	2.082e-12
4	4	0.9836		4	4	0.6546
5	5	0.9848		5	5	0.8952
5	5	0.9872		5	5	0.9131
6	6	0.9944		6	6	0.8382
7	7	0.9779		6	6	0.8478
7	7	0.9851		7	7	0.528
7	7	0.9826		7	7	0.453
8	8	0.9954		8	8	0.3565
8	8	0.9919		8	8	0.0622
9	9	0.9728		8	8	0.34
9	9	0.9577
10	10	0.9845
10	10	0.9908

## Sheet: Fig5G-I
General Information					Attached DFC cells								Apical Attachment
									Plot 4I (Y)		Plot 4G (Y)						Plot 4I (X)		Plot 4G (X)		Plot 4H			Persistence	Value	Standard Error
Embryo (colored row)	Cell ID	Track number	Time (min)		X position (mm)	Y position (mm)	Trajectory (mm)	Total Trajectory (mm)	Speed (mm/s)	displacement(mm)	Persistence		X position (mm)	Y position (mm)	Trajectory (mm)	Total Trajectory (mm)	Speed (mm/s)	displacement(mm)	Persistence		Lenght beetween Apical Attach and DFC center (mm)			Intercept	0	--
1	1	1	3.1		21.048	131.935		124.595		122.29	0.981498		24.667	139.781		123.381		120.982	0.980558		8.64042			Slope	0.99768	0.00441
1	1	2	6.2		25.155	141.689	10.5834		3.41399				29.292	147.49	8.98996		2.89999				7.12505
1	1	3	9.3		31.829	150.416	10.9865		3.54403				34.945	155.712	9.97786		3.21866				6.14468			Persistence
1	1	4	12.4		35.422	155.037	5.85349		1.88822				38.543	161.365	6.7009		2.16158				7.05579			Number of Points	17
1	1	5	15.5		45.176	161.197	11.5363		3.72139				46.765	166.504	9.69591		3.12771				5.53978			Degrees of Freedom	16
1	1	6	18.6		46.716	166.331	5.36		1.72903				48.821	174.213	7.97846		2.5737				8.15824			Residual Sum of Squares	0.00508
1	1	7	21.7		49.797	173.518	7.81956		2.52244				53.446	178.838	6.54074		2.10992				6.45117			Pearson's r	0.99984
1	1	8	24.8		55.444	178.651	7.63127		2.4617				57.043	185.518	7.58688		2.44738				7.05071			R-Square(COD)	0.99969
1	1	9	27.9		60.064	186.352	8.98052		2.89694				63.21	194.769	11.1181		3.58649				8.98572			Adj. R-Square	0.99967
1	1	10	31		63.657	193.026	7.5797		2.44507				68.349	201.963	8.84098		2.85193				10.0938
1	1	11	34.1		67.251	199.699	7.5793		2.44493				72.974	211.727	10.804		3.48516				13.3201
1	1	12	37.2		72.898	206.887	9.14089		2.94868				77.085	217.894	7.41163		2.39085				11.7765
1	1	13	40.3		77.005	212.534	6.98255		2.25244				83.766	222.005	7.84449		2.53048				11.6366			Speed	Value	Standard Error
1	1	14	43.4		81.112	219.207	7.83558		2.52761				86.849	227.144	5.99285		1.93318				9.79332			Intercept	0	--
1	1	15	46.5		86.246	224.341	7.26057		2.34212				91.474	233.311	7.7086		2.48665				10.3823			Slope	0.97252	0.01691
1	1	16	49.6		93.433	230.501	9.46565		3.05344				96.1	237.423	6.18938		1.99657				7.41802
2	2	1	5		422.5	177.625		103.434		102.737	0.993261		424.169	182.887		110.328		108.874	0.986824		5.52034			Speed
2	2	2	10		418.907	185.839	8.96546		1.79309				420.319	193.154	10.9651		2.19302				7.45003			Number of Points	276
2	2	3	15		416.853	193.539	7.96925		1.59385				419.035	198.929	5.91602		1.1832				5.81491			Degrees of Freedom	275
2	2	4	20		413.773	202.78	9.74076		1.94815				413.26	207.272	10.1467		2.02935				4.5212			Residual Sum of Squares	82.4657
2	2	5	25		409.666	209.453	7.83558		1.56712				410.051	213.689	7.17465		1.43493				4.25346			Pearson's r	0.96085
2	2	6	30		406.586	217.154	8.29408		1.65882				406.201	223.956	10.9651		2.19302				6.81289			R-Square(COD)	0.92324
2	2	7	35		404.019	224.854	8.11662		1.62332				404.276	229.731	6.08738		1.21748				4.88377			Adj. R-Square	0.92296
2	2	8	40		402.479	229.988	5.36		1.072				400.426	238.074	9.18848		1.8377				8.34255
2	2	9	45		396.319	238.715	10.682		2.13641				394.65	247.699	11.2251		2.24502				9.13771
2	2	10	50		391.185	246.929	9.68647		1.93729				388.233	254.116	9.07501		1.815				7.76964
2	2	11	55		387.591	253.603	7.58018		1.51604				386.308	263.742	9.81659		1.96332				10.2199
2	2	12	60		382.971	264.384	11.7292		2.34584				384.383	272.084	8.56123		1.71225				7.82839
2	3	13	65		380.918	271.571	7.47448		1.4949				379.891	282.351	11.2067		2.24133				10.8288
2	3	1	5		352.169	104.727		80.2678		78.7392	0.980957		350.372	115.507		75.7171		75.11	0.991983		10.9288
2	3	2	10		352.169	114.481	9.754		1.9508				349.089	119.999	4.67163		0.934327				6.31939
2	3	3	15		350.116	118.074	4.13817		0.827634				347.806	125.775	5.91678		1.18336				8.03999
2	3	4	20		348.062	122.695	5.05693		1.01139				345.88	132.192	6.6998		1.33996				9.74444
2	3	5	25		347.036	128.342	5.73945		1.14789				343.314	136.684	5.17324		1.03465				9.13467
2	3	6	30		342.929	140.149	12.5009		2.50018				339.463	146.309	10.3668		2.07336				7.06815
2	3	7	35		339.848	147.336	7.81956		1.56391				336.897	152.726	6.91102		1.3822				6.14496
2	3	8	40		337.795	153.496	6.4931		1.29862				335.613	157.86	5.29213		1.05843				4.8791
2	3	9	45		335.742	158.117	5.05653		1.01131				333.046	161.069	4.1094		0.82188				3.99784
2	3	10	50		331.635	164.277	7.40358		1.48072				329.196	168.127	8.03977		1.60795				4.55755
2	3	11	55		329.581	168.384	4.59199		0.918398				327.913	173.903	5.91678		1.18336				5.76555
2	3	12	60		326.501	173.004	5.55255		1.11051				326.629	177.753	4.05847		0.811693				4.75072
2	3	13	65		326.501	179.165	6.161		1.2322				324.704	186.095	8.56123		1.71225				7.1592
2	4	1	5		408.64	155.037		80.8184		79.983	0.989663		410.693	158.502		83.7556		83.0085	0.991081		4.02753
2	4	2	10		405.559	159.657	5.5531		1.11062				408.768	163.635	5.48209		1.09642				5.11098
2	4	3	15		404.019	165.817	6.34958		1.26992				406.201	170.694	7.51126		1.50225				5.34287
2	4	4	20		399.912	173.518	8.72771		1.74554				402.992	179.678	9.53991		1.90798				6.88709
2	4	5	25		398.372	181.732	8.35712		1.67142				400.426	186.095	6.91102		1.3822				4.82231
2	4	6	30		396.832	188.405	6.8484		1.36968				398.501	192.512	6.69952		1.3399				4.43317
2	4	7	35		393.239	194.566	7.13215		1.42643				394.65	199.571	8.04112		1.60822				5.20009
2	4	8	40		390.672	201.753	7.63167		1.52633				392.083	205.988	6.91139		1.38228				4.46387
2	4	9	45		387.078	207.4	6.69369		1.33874				388.875	211.122	6.05386		1.21077				4.1331
2	4	10	50		384.511	212.534	5.73999		1.148				385.025	216.897	6.94069		1.38814				4.39317
2	4	11	55		383.485	217.154	4.73255		0.946511				380.533	222.673	7.31712		1.46342				6.25889
2	4	12	60		380.918	222.801	6.20307		1.24061				377.966	227.165	5.17374		1.03475				5.26866
2	4	13	65		379.378	229.475	6.84937		1.36987				376.682	234.223	7.17384		1.43477				5.46003
3	5	1	4.18333		388.105	296.726		104.594		101.53	0.970708		383.1	304.811		101.227		99.7463	0.98537		9.5088
3	5	2	8.36667		383.998	301.859	6.57382		1.57143				378.608	311.228	7.833		1.87243				10.8088
3	5	3	12.55		379.891	308.02	7.40442		1.76998				378.608	317.004	5.776		1.38072				9.07515
3	5	4	16.7333		381.431	315.72	7.85249		1.87709				376.682	324.062	7.31607		1.74886				9.59906
3	5	5	20.9167		376.297	322.907	8.83238		2.11133				373.474	331.121	7.75376		1.85349				8.68557
3	5	6	25.1		372.191	331.635	9.64558		2.30572				370.907	336.897	6.32073		1.51093				5.41639
3	5	7	29.2833		371.677	341.389	9.76753		2.33487				368.982	346.522	9.81561		2.34636				5.79747
3	5	8	33.4667		370.137	348.062	6.8484		1.63707				367.057	352.939	6.69952		1.60148				5.76815
3	5	9	37.65		367.57	354.223	6.67438		1.59547				366.415	359.998	7.08813		1.69437				5.88937
3	5	10	41.8333		364.49	362.437	8.77247		2.097				363.207	367.699	8.34246		1.99421				5.41615
3	5	11	46.0167		360.383	371.164	9.6451		2.3056				359.356	375.399	8.60931		2.058				4.35775
3	5	12	50.2		359.87	374.757	3.62944		0.867595				356.79	382.458	7.51091		1.79544				8.29408
3	5	13	54.3833		356.276	380.404	6.69369		1.60008				353.581	387.591	6.05354		1.44706				7.67568
3	5	14	58.5667		353.196	385.538	5.98702		1.43116				350.372	392.725	6.05439		1.44726				7.72191
3	5	15	62.75		349.602	390.672	6.26696		1.49808				347.164	397.859	6.05386		1.44714				7.58926
3	6	1	4.18333		333.688	194.052		84.5292		83.4331	0.987032		329.196	204.063		84.2381		81.1703	0.963582		10.9726
3	6	2	8.36667		332.148	198.673	4.87086		1.16435				327.271	211.122	7.31677		1.74903				13.3702
3	6	3	12.55		331.121	204.32	5.73963		1.37202				325.988	216.897	5.9158		1.41414				13.5841
3	6	4	16.7333		330.094	210.994	6.75256		1.61416				324.704	221.389	4.67191		1.11679				11.7093
3	6	5	20.9167		328.554	217.154	6.34958		1.51783				324.704	227.806	6.417		1.53394				11.3264
3	6	6	25.1		324.961	224.341	8.03509		1.92074				319.57	231.657	6.4178		1.53414				9.08772
3	6	7	29.2833		323.934	226.908	2.76482		0.660913				319.57	234.865	3.208		0.766853				9.07515
3	6	8	33.4667		323.421	231.528	4.64839		1.11117				319.57	241.924	7.059		1.68741				11.0863
3	6	9	37.65		322.394	237.175	5.73963		1.37202				320.212	246.416	4.53765		1.0847				9.49511
3	6	10	41.8333		321.881	245.902	8.74206		2.08974				317.645	252.191	6.31982		1.51071				7.58256
3	6	11	46.0167		321.881	250.009	4.107		0.981753				314.437	257.967	6.60707		1.57938				10.8969
3	6	12	50.2		320.341	255.656	5.85322		1.39918				312.512	264.384	6.69952		1.60148				11.7248
3	6	13	54.3833		318.8	262.844	7.35133		1.75729				309.945	270.801	6.91139		1.65213				11.9048
3	6	14	58.5667		316.234	267.977	5.73864		1.37179				306.095	275.934	6.4164		1.5338				12.8885
3	6	15	62.75		312.127	274.651	7.83644		1.87325				303.528	281.068	5.73999		1.37211				10.7294
4	7	1	2.33333		44.667	81.256		102.061		96.8082	0.948535		44.667	82.681		110.603		105.507	0.953922		1.425
4	7	2	4.66667		47.518	85.532	5.1393		2.20256				47.043	87.908	5.74168		2.46072				2.42301
4	7	3	7		50.369	89.809	5.14013		2.20291				47.518	91.71	3.83156		1.6421				3.42666
4	7	4	9.33333		51.319	93.61	3.91792		1.67911				49.419	95.036	3.83094		1.64183				2.3756
4	7	5	11.6667		52.745	98.362	4.96135		2.12629				51.795	99.313	4.89266		2.09685				1.34421
4	7	6	14		53.22	104.064	5.72175		2.45218				54.17	103.589	4.8913		2.09627				1.06213
4	7	7	16.3333		53.695	108.816	4.77568		2.04672				56.546	108.341	5.3129		2.27696				2.8903
4	7	8	18.6667		52.27	112.142	3.61841		1.55075				55.596	113.093	4.84603		2.07687				3.45929
4	7	9	21		54.17	116.894	5.11776		2.19333				57.972	116.419	4.0875		1.75179				3.83156
4	7	10	23.3333		52.745	119.27	2.77056		1.18738				55.596	122.121	6.17723		2.64738				4.03192
4	7	11	25.6667		54.17	124.022	4.96106		2.12617				56.071	125.923	3.83156		1.6421				2.68842
4	7	12	28		54.646	127.348	3.35989		1.43995				59.397	131.625	6.60114		2.82906				6.39255
4	7	13	30.3333		57.972	130.674	4.70367		2.01586				61.298	133.05	2.3758		1.0182				4.0875
4	7	14	32.6667		59.397	133.05	2.77056		1.18738				64.624	136.377	4.70438		2.01616				6.196
4	7	15	35		60.348	136.377	3.46025		1.48296				66.05	139.228	3.18774		1.36617				6.37503
4	7	16	37.3333		62.249	138.277	2.68771		1.15188				66.05	142.554	3.326		1.42543				5.72192
4	7	17	39.6667		64.149	139.703	2.3756		1.01811				67.475	145.88	3.61841		1.55075				7.01553
4	7	18	42		66.525	143.029	4.0875		1.75179				67.475	149.682	3.802		1.62943				6.72048
4	7	19	44.3333		66.525	145.88	2.851		1.22186				68.901	153.483	4.05969		1.73987				7.96561
4	7	20	46.6667		66.05	150.157	4.3033		1.84427				69.376	156.809	3.35975		1.43989				7.43716
4	7	21	49		65.1	152.533	2.55888		1.09666				70.802	161.561	4.96135		2.12629				10.6779
4	7	22	51.3333		66.05	156.809	4.38026		1.87725				71.277	165.838	4.3033		1.84427				10.4329
4	7	23	53.6667		67	160.136	3.45998		1.48285				71.277	171.54	5.702		2.44371				12.1797
4	7	24	56		68.901	164.887	5.11721		2.19309				74.128	174.866	4.38069		1.87744				11.2651
4	7	25	58.3333		71.277	169.639	5.3129		2.27696				74.603	178.192	3.35975		1.43989				9.17693
4	7	26	60.6667		72.702	173.916	4.50814		1.93206				76.029	183.419	5.41803		2.32201				10.0686
4	8	1	2.33333		59.397	71.277		112.14		107.443	0.958111		59.873	72.227		111.965		109.322	0.976393		1.06258
4	8	2	4.66667		58.922	76.504	5.24854		2.24937				59.397	77.929	5.72183		2.45221				1.50208
4	8	3	7		62.724	81.256	6.08578		2.60819				63.199	82.681	6.08578		2.60819				1.50208
4	8	4	9.33333		63.199	83.632	2.42301		1.03843				63.674	86.483	3.83156		1.6421				2.8903
4	8	5	11.6667		65.1	86.007	3.04211		1.30376				66.05	92.66	6.61821		2.83638				6.72048
4	8	6	14		64.624	88.859	2.89145		1.23919				67.475	97.412	4.96106		2.12617				9.01565
4	8	7	16.3333		66.525	95.986	7.37617		3.16122				68.426	101.688	4.38048		1.87735				6.01054
4	8	8	18.6667		67	100.263	4.3033		1.84427				69.376	106.44	4.84603		2.07687				6.61821
4	8	9	21		68.426	104.539	4.50751		1.93179				69.376	111.667	5.227		2.24014				7.19103
4	8	10	23.3333		68.426	109.766	5.227		2.24014				70.327	115.944	4.38145		1.87777				6.46386
4	8	11	25.6667		70.802	115.469	6.17815		2.64778				71.277	121.171	5.31263		2.27684				5.72175
4	8	12	28		73.653	119.27	4.7514		2.03631				71.277	124.497	3.326		1.42543				5.74168
4	8	13	30.3333		73.653	123.072	3.802		1.62943				72.702	129.249	4.96106		2.12617				6.24978
4	8	14	32.6667		75.554	127.823	5.11721		2.19309				75.078	133.05	4.48252		1.92108				5.24863
4	8	15	35		80.305	131.15	5.80008		2.48575				75.078	134.001	0.951		0.407571				5.95397
4	8	16	37.3333		81.256	133.525	2.55832		1.09642				74.603	138.752	4.77469		2.04629				8.46073
4	8	17	39.6667		84.582	137.327	5.05148		2.16492				76.029	143.029	4.50846		1.9322				10.2794
4	8	18	42		86.007	142.079	4.96106		2.12617				75.078	146.355	3.45929		1.48255				11.7357
4	8	19	44.3333		86.007	144.93	2.851		1.22186				76.979	149.206	3.42666		1.46857				9.98944
4	8	20	46.6667		86.958	147.781	3.00543		1.28804				77.454	153.958	4.77568		2.04672				11.335
4	8	21	49		87.908	151.582	3.91792		1.67911				77.929	157.76	3.83156		1.6421				11.7366
4	8	22	51.3333		87.908	154.909	3.327		1.42586				77.929	162.036	4.276		1.83257				12.2627
4	8	23	53.6667		89.334	160.136	5.41803		2.32201				78.88	166.313	4.38145		1.87777				12.1425
4	8	24	56		88.859	164.887	4.77469		2.04629				80.781	170.589	4.67953		2.00551				9.88771
4	8	25	58.3333		89.809	169.164	4.38124		1.87767				81.731	175.341	4.84603		2.07687				10.169
4	8	26	60.6667		92.66	173.441	5.14013		2.20291				82.681	179.143	3.91889		1.67952				11.4932
4	9	1	2.33333		93.135	77.929		111.51		102.609	0.920179		94.086	77.929		110.109		107.656	0.977724		0.951
4	9	2	4.66667		96.937	82.206	5.72258		2.45253				95.511	83.156	5.41776		2.3219				1.71347
4	9	3	7		99.788	86.483	5.14013		2.20291				98.362	87.433	5.14013		2.20291				1.71347
4	9	4	9.33333		101.213	88.859	2.77056		1.18738				97.887	89.334	1.95945		0.839762				3.35975
4	9	5	11.6667		103.589	91.71	3.71128		1.59055				98.837	93.61	4.38026		1.87725				5.11776
4	9	6	14		106.915	94.086	4.0875		1.75179				100.263	97.412	4.06063		1.74027				7.43716
4	9	7	16.3333		106.915	98.837	4.751		2.03614				102.164	102.164	5.11813		2.19349				5.80008
4	9	8	18.6667		107.391	101.213	2.42321		1.03852				102.639	106.44	4.3023		1.84384				7.06421
4	9	9	21		105.965	106.44	5.41803		2.32201				102.639	110.242	3.802		1.62943				5.05148
4	9	10	23.3333		106.44	110.242	3.83156		1.6421				102.639	113.093	2.851		1.22186				4.7514
4	9	11	25.6667		106.915	115.944	5.72175		2.45218				102.639	117.845	4.752		2.03657				4.67953
4	9	12	28		106.915	120.22	4.276		1.83257				104.064	122.596	4.9601		2.12576				3.71128
4	9	13	30.3333		112.142	123.547	6.196		2.65543				106.44	127.348	5.3129		2.27696				6.85277
4	9	14	32.6667		113.568	125.923	2.77107		1.1876				107.866	130.674	3.61881		1.55092				7.42191
4	9	15	35		114.993	128.774	3.18729		1.36598				108.341	135.426	4.77568		2.04672				9.40735
4	9	16	37.3333		115.944	133.05	4.38048		1.87735				108.816	138.752	3.35975		1.43989				9.12804
4	9	17	39.6667		118.32	136.852	4.48337		1.92144				107.391	140.653	2.3758		1.0182				11.5711
4	9	18	42		121.646	141.604	5.80033		2.48585				108.341	143.979	3.45901		1.48243				13.5153
4	9	19	44.3333		119.27	147.781	6.61821		2.83638				108.816	147.781	3.83156		1.6421				10.454
4	9	20	46.6667		120.22	151.582	3.91792		1.67911				109.291	155.859	8.09195		3.46798				11.7361
4	9	21	49		120.696	155.384	3.83168		1.64215				109.766	158.235	2.42301		1.03843				11.2957
4	9	22	51.3333		118.795	160.611	5.56195		2.38369				110.717	162.987	4.84623		2.07695				8.42018
4	9	23	53.6667		120.22	162.511	2.375		1.01786				111.667	167.738	4.84505		2.07645				10.0237
4	9	24	56		120.22	166.313	3.802		1.62943				113.093	172.015	4.50846		1.9322				9.12726
4	9	25	58.3333		119.27	171.54	5.31263		2.27684				112.618	177.717	5.72175		2.45218				9.07769
4	9	26	60.6667		120.696	176.767	5.41803		2.32201				113.093	183.894	6.19524		2.6551				10.4211
5	10	1	2.5		126.424	215.846		136.41		133.945	0.981932		122.698	231.906		135.357		131.586	0.972142		16.4866
5	10	2	5		128.994	220.986	5.74669		2.29868				125.91	237.046	6.06107		2.42443				16.3534
5	10	3	7.5		131.05	229.722	8.97468		3.58987				125.91	242.827	5.781		2.3124				14.077
5	10	4	10		130.022	236.917	7.26807		2.90723				128.48	251.821	9.35398		3.74159				14.9836
5	10	5	12.5		131.564	240.515	3.91451		1.5658				132.334	255.675	5.45038		2.18015				15.1795
5	10	6	15		132.077	246.168	5.67623		2.27049				132.977	262.099	6.4561		2.58244				15.9564
5	10	7	17.5		134.133	252.849	6.9902		2.79608				135.546	266.596	5.17907		2.07163				13.8194
5	10	8	20		135.161	259.53	6.75963		2.70385				136.831	273.02	6.55126		2.6205				13.593
5	10	9	22.5		136.703	263.641	4.39068		1.75627				140.043	278.159	6.06022		2.42409				14.8972
5	10	10	25		137.731	269.808	6.25209		2.50084				143.898	285.868	8.61915		3.44766				17.2034
5	10	11	27.5		142.356	274.433	6.54074		2.6163				145.825	291.007	5.48841		2.19536				16.9331
5	10	12	30		144.412	281.628	7.48299		2.9932				148.394	297.431	6.91864		2.76745				16.297
5	10	13	32.5		146.467	288.309	6.98991		2.79596				150.322	301.286	4.31024		1.7241				13.5375
5	10	14	35		147.495	292.934	4.73787		1.89515				151.606	308.994	7.81421		3.12569				16.5778
5	10	15	37.5		150.579	299.615	7.35845		2.94338				152.891	312.849	4.06353		1.62541				13.4344
5	10	16	40		153.662	305.268	6.43904		2.57562				158.03	316.061	6.06022		2.42409				11.6434
5	10	17	42.5		155.718	310.922	6.01622		2.40649				159.958	322.485	6.70708		2.68283				12.3159
5	10	18	45		158.801	316.061	5.99285		2.39714				162.527	329.551	7.51852		3.00741				13.9951
5	10	19	47.5		160.343	323.256	7.35838		2.94335				167.024	337.26	8.92478		3.56991				15.516
5	10	20	50		163.427	329.423	6.89514		2.75806				166.382	343.684	6.456		2.5824				14.5639
5	10	21	52.5		164.968	336.618	7.35817		2.94327				168.309	349.466	6.09466		2.43786				13.2753
5	10	22	55		165.996	343.812	7.26708		2.90683				170.236	354.605	5.48841		2.19536				11.596
5	11	1	2.5		370.536	201.457		131.237		129.509	0.986839		362.314	215.204		121.24		119.22	0.983342		16.0182
5	11	2	5		368.481	208.652	7.48272		2.99309				362.314	219.058	3.854		1.5416				12.0961
5	11	3	7.5		367.453	216.874	8.28602		3.31441				359.744	226.767	8.1261		3.25044				12.5419
5	11	4	10		365.911	224.583	7.86171		3.14468				357.817	233.191	6.7068		2.68272				11.8157
5	11	5	12.5		363.341	233.834	9.60135		3.84054				355.247	239.615	6.91901		2.7676				9.9465
5	11	6	15		361.286	241.028	7.48176		2.9927				353.32	245.397	6.09466		2.43786				9.08545
5	11	7	17.5		357.688	246.168	6.27417		2.50967				350.75	250.536	5.7458		2.29832				8.19849
5	11	8	20		355.633	250.793	5.06099		2.0244				350.108	256.318	5.81753		2.32701				7.81353
5	11	9	22.5		355.119	257.474	6.70074		2.6803				351.393	261.457	5.29722		2.11889				5.45411
5	11	10	25		354.605	262.099	4.65347		1.86139				349.466	269.166	7.94619		3.17848				8.73795
5	11	11	27.5		354.605	269.808	7.709		3.0836				349.466	274.947	5.781		2.3124				7.26764
5	11	12	30		355.119	276.489	6.70074		2.6803				347.538	282.014	7.32528		2.93011				9.38068
5	11	13	32.5		353.577	281.114	4.87528		1.95011				345.611	287.153	5.48841		2.19536				9.99633
5	11	14	35		353.063	285.74	4.65447		1.86179				343.042	290.365	4.11299		1.6452				11.0368
5	11	15	37.5		350.493	291.393	6.20978		2.48391				342.399	294.862	4.54274		1.81709				8.80607
5	11	16	40		348.952	297.046	5.85927		2.34371				341.114	300.001	5.29722		2.11889				8.37653
5	11	17	42.5		347.41	303.213	6.35686		2.54274				339.83	307.71	7.8152		3.12608				8.81359
5	11	18	45		345.868	307.324	4.39068		1.75627				337.26	314.134	6.91901		2.7676				10.9761
5	11	19	47.5		343.812	311.949	5.0614		2.02456				337.26	317.346	3.212		1.2848				8.4886
5	11	20	50		341.757	316.575	5.06191		2.02476				336.618	321.2	3.90711		1.56284				6.91375
5	11	21	52.5		340.729	320.172	3.74101		1.49641				335.975	325.054	3.90727		1.56291				6.81428
5	11	22	55		340.215	327.367	7.21334		2.88533				335.975	331.478	6.424		2.5696				5.90575
6	12	1	6.33333		635.517	298.181		122.733		122.114	0.994956		631.501	305.209		124.206		122.489	0.98618		8.09451
6	12	2	12.6667		632.505	304.205	6.73504		1.06343				632.505	313.241	8.09451		1.27808				9.036
6	12	3	19		628.489	312.237	8.98005		1.4179				629.493	320.268	7.64532		1.20716				8.09351
6	12	4	25.3333		623.469	326.292	14.9246		2.35651				621.461	336.332	17.9601		2.8358				10.2388
6	12	5	31.6667		616.441	343.36	18.4583		2.91447				612.425	352.396	18.431		2.91016				9.88825
6	12	6	38		610.417	360.427	18.0989		2.85772				605.398	367.455	16.6178		2.62387				8.63615
6	12	7	44.3333		602.386	372.475	14.4793		2.28621				597.366	379.503	14.4799		2.2863				8.63673
6	12	8	50.6667		596.362	387.535	16.2201		2.56107				592.346	394.563	15.8746		2.50652				8.09451
6	12	9	57		593.35	399.582	12.4178		1.96071				589.334	405.606	11.4464		1.80733				7.23995
6	12	10	63.3333		590.338	411.63	12.4188		1.96086				585.318	418.658	13.6559		2.15619				8.63673
6	13	1	6.33333		289.145	228.907		110.885		110.332	0.995013		292.157	234.93		113.211		111.907	0.98848		6.73414
6	13	2	12.6667		292.157	242.962	14.3741		2.2696				296.173	248.986	14.6185		2.30818				7.23995
6	13	3	19		293.161	253.002	10.0901		1.59317				296.173	260.03	11.044		1.74379				7.64624
6	13	4	25.3333		296.173	267.058	14.3751		2.26975				301.193	272.077	13.0511		2.0607				7.09865
6	13	5	31.6667		300.189	282.117	15.5853		2.46084				305.209	283.121	11.7515		1.8555				5.11942
6	13	6	38		300.189	288.141	6.024		0.951158				306.213	294.165	11.0895		1.75098				8.51922
6	13	7	44.3333		301.193	301.193	13.0906		2.06693				306.213	306.213	12.048		1.90232				7.09935
6	13	8	50.6667		303.201	311.233	10.2388		1.61666				309.225	317.256	11.4464		1.80733				8.51852
6	13	9	57		303.201	322.276	11.043		1.74363				310.229	327.296	10.0901		1.59317				8.63673
6	13	10	63.3333		303.201	338.34	16.064		2.53642				310.229	345.368	18.072		2.85347				9.93909
7	14	1	3		106.417	212.833		92.4143		91.1819	0.986665		115.507	222.459		87.5654	0	85.4959	0.976366		13.2396
7	14	2	6		109.625	218.181	6.23637		2.07879				117.646	225.667	3.85572		1.28524				10.9716
7	14	3	9		111.764	224.063	6.25885		2.08628				119.251	228.876	3.58799		1.196				8.90057
7	14	4	12		111.764	227.806	3.743		1.24767				120.32	234.223	5.45281		1.8176				10.695
7	14	5	15		113.368	232.619	5.07324		1.69108				121.39	239.036	4.9305		1.6435				10.2728
7	14	6	18		115.507	238.501	6.25885		2.08628				122.459	243.314	4.40954		1.46985				8.45549
7	14	7	21		117.646	241.71	3.85655		1.28552				124.598	247.592	4.78295		1.59432				9.10649
7	14	8	24		119.251	244.918	3.5871		1.1957				125.668	251.87	4.40978		1.46993				9.46088
7	14	9	27		120.855	249.731	5.07324		1.69108				127.807	256.683	5.26691		1.75564				9.83161
7	14	10	30		122.459	255.079	5.58336		1.86112				128.342	261.496	4.84264		1.61421				8.70561
7	14	11	33		124.063	259.357	4.56882		1.52294				129.946	264.17	3.11819		1.0394				7.60096
7	14	12	36		124.063	262.565	3.208		1.06933				131.55	271.122	7.13464		2.37821				11.37
7	14	13	39		124.598	268.982	6.43926		2.14642				133.154	276.469	5.5824		1.8608				11.3693
7	14	14	42		124.598	273.261	4.279		1.42633				134.224	279.143	2.88013		0.960045				11.2809
7	14	15	45		125.668	278.073	4.92953		1.64318				133.154	282.886	3.89294		1.29765				8.89973
7	14	16	48		126.737	283.421	5.45379		1.81793				133.154	288.768	5.882		1.96067				8.35274
7	14	17	51		127.272	287.699	4.31132		1.43711				134.759	291.977	3.58799		1.196				8.62302
7	14	18	54		127.807	291.442	3.78104		1.26035				134.224	295.186	3.25329		1.08443				7.42936
7	14	19	57		128.876	296.255	4.93029		1.64343				134.224	301.603	6.417		2.139				7.56321
7	14	20	60		129.411	301.068	4.84264		1.61421				134.224	305.881	4.278		1.426				6.80661
7	15	1	3		88.235	205.346		86.9634		84.1764	0.967952		93.048	215.507		80.5398		78.8727	0.979302		11.2433
7	15	2	6		90.909	211.229	6.4622		2.15407				95.187	220.32	5.26691		1.75564				10.0473
7	15	3	9		91.978	215.507	4.40954		1.46985				94.117	224.063	3.89294		1.29765				8.81932
7	15	4	12		92.513	218.715	3.25231		1.0841				95.721	228.341	4.56882		1.52294				10.1465
7	15	5	15		93.048	224.598	5.90728		1.96909				96.791	232.084	3.89294		1.29765				8.3696
7	15	6	18		94.117	228.341	3.89266		1.29755				97.86	235.293	3.38237		1.12746				7.89559
7	15	7	21		95.721	231.55	3.58755		1.19585				98.93	239.036	3.89294		1.29765				8.14481
7	15	8	24		97.326	236.362	5.07261		1.69087				99.999	244.384	5.45379		1.81793				8.45561
7	15	9	27		99.465	242.245	6.25979		2.0866				100.534	248.127	3.78104		1.26035				5.97835
7	15	10	30		102.673	243.849	3.58665		1.19555				102.138	252.405	4.56882		1.52294				8.57271
7	15	11	33		105.882	249.196	6.23603		2.07868				103.743	256.683	4.56917		1.52306				7.78656
7	15	12	36		106.951	252.94	3.89362		1.29787				104.278	261.496	4.84264		1.61421				8.96382
7	15	13	39		106.951	256.683	3.743		1.24767				104.278	266.309	4.813		1.60433				9.99024
7	15	14	42		106.951	259.892	3.209		1.06967				105.347	269.517	3.38142		1.12714				9.75774
7	15	15	45		106.951	265.774	5.882		1.96067				106.417	273.795	4.40978		1.46993				8.03876
7	15	16	48		108.021	271.656	5.97853		1.99284				106.951	278.608	4.84253		1.61418				7.03386
7	15	17	51		107.486	274.33	2.72699		0.908998				106.417	280.747	2.20465		0.734883				6.50543
7	15	18	54		107.486	278.073	3.743		1.24767				107.486	286.095	5.45379		1.81793				8.022
7	15	19	57		108.021	282.886	4.84264		1.61421				108.556	288.234	2.3917		0.797233				5.37469
7	15	20	60		108.021	287.164	4.278		1.426				107.486	293.047	4.9305		1.6435				5.90728
8	16	1	4.8		295.72	129.946		87.0624		86.1206	0.989183		292.512	134.759		87.013		85.2206	0.979401		5.78414
8	16	2	9.6		291.442	137.967	9.09053		1.89386				289.838	142.78	8.45498		1.76145				5.07324
8	16	3	14.4		288.234	147.593	10.1465		2.11385				285.56	150.801	9.09053		1.89386				4.17631
8	16	4	19.2		288.234	154.01	6.417		1.33688				286.095	158.288	7.50609		1.56377				4.78295
8	16	5	24		286.629	162.031	8.18		1.70417				283.956	167.379	9.33925		1.94568				5.9788
8	16	6	28.8		285.025	170.587	8.70505		1.81355				283.421	173.261	5.90628		1.23048				3.11819
8	16	7	33.6		283.956	177.004	6.50543		1.3553				279.143	180.213	8.16282		1.70059				5.78469
8	16	8	38.4		282.351	182.352	5.58365		1.16326				279.143	186.63	6.417		1.33688				5.3472
8	16	9	43.2		279.143	189.839	8.14533		1.69694				277.004	193.047	6.76411		1.40919				3.85572
8	16	10	48		276.469	195.186	5.97835		1.24549				273.795	198.929	6.70042		1.39592				4.60004
8	16	11	52.8		275.4	203.207	8.09192		1.68582				271.122	206.416	7.94985		1.65622				5.3478
8	16	12	57.6		274.865	209.09	5.90728		1.23068				270.587	211.764	5.37469		1.11973				5.04495
8	16	13	62.4		274.33	213.368	4.31132		0.898192				270.587	217.111	5.347		1.11396				5.2934
8	17	1	4.8		275.934	122.459		86.1463		85.7167	0.995014		274.33	127.807		86.2746		85.696	0.993293		5.58336
8	17	2	9.6		274.865	131.015	8.62252		1.79636				274.33	136.898	9.091		1.89396				5.90728
8	17	3	14.4		273.795	137.432	6.5056		1.35533				273.261	144.384	7.56194		1.5754				6.97248
8	17	4	19.2		272.191	145.989	8.70604		1.81376				272.191	154.01	9.68529		2.01777				8.021
8	17	5	24		271.122	155.614	9.68418		2.01754				272.191	159.357	5.347		1.11396				3.89266
8	17	6	28.8		270.052	164.17	8.62265		1.79638				271.122	168.983	9.68518		2.01775				4.9305
8	17	7	33.6		270.052	166.844	2.674		0.557083				271.122	174.331	5.348		1.11417				7.56307
8	17	8	38.4		268.448	174.331	7.65689		1.59519				269.517	180.213	6.09704		1.27022				5.97835
8	17	9	43.2		266.843	182.887	8.70524		1.81359				266.309	188.234	8.63873		1.79974				5.3736
8	17	10	48		264.17	188.769	6.46087		1.34601				266.309	194.117	5.883		1.22562				5.7599
8	17	11	52.8		264.17	194.117	5.348		1.11417				265.774	201.603	7.50509		1.56356				7.65591
8	17	12	57.6		262.031	201.603	7.7856		1.622				264.704	206.951	5.45399		1.13625				5.9788
8	17	13	62.4		261.496	206.951	5.37469		1.11973				263.635	212.833	5.97835		1.24549				6.25885
