# Supplementary material for: Apical contacts stemming from incomplete delamination guide progenitor cell allocation through a dragging mechanism
Source: eLife. 2021 Aug 27;10:e66483. doi: 10.7554/eLife.66483 (PMC8460252; doi:10.7554/eLife.66483)
Supplement: Figure 6—source data 1. [file elife-66483-fig6-data1.xlsx]

## Sheet: Fig5A
	Embryo ID	Initial developmental stage of imaging	Number of escaped DFCs (Nº)	Escaped DFC Allocation along AV axis of DFC cluster	Developmental stage of the escape	Cell division
	1	shield stage	1	Animal	75% epiboly	Yes, before escape
	2	shield stage	1	Animal	60% epiboly	No
	2	shield stage	2	Animal	60% epiboly	Yes, before escape
	2	shield stage	2	Animal	90% epiboly	Yes, before escape
	3	shield stage	2	Medial	60% epiboly	Yes, before escape
	3	60% epiboly	2	Animal	60% epiboly	No
	4	60% epiboly	1	Animal	75% epiboly	No
	4	60% epiboly	1	Animal	60% epiboly	No
	5	60% epiboly	1	Animal	75% epiboly	No
	6	60% epiboly	1	Animal	75% epiboly	Yes, after escape
	7	60% epiboly	0
	8	60% epiboly	0
	9	60% epiboly	0
	10	60% epiboly	0
	11	60% epiboly	0
	12	60% epiboly	1	Animal	75% epiboly	No
	13	60% epiboly	1	Animal	60% epiboly	Yes, before escape
	13	60% epiboly	1	Animal	60% epiboly	No
	13	60% epiboly	1	Animal	60% epiboly	Yes, before escape
	13	60% epiboly	2	Animal	75% epiboly	Yes, before escape
	14	60% epiboly	0
	15	60% epiboly	0
	16	60% epiboly	0
	17	60% epiboly	1	Animal	60% epiboly	Yes, before escape
	17	60% epiboly	1	Animal	75% epiboly	No
	18	60% epiboly	0
	19	60% epiboly	0
	20	60% epiboly	1	Animal	75% epiboly	No
	21	60% epiboly	2	Vegetal	75% epiboly	Yes, before escape
	22	60% epiboly	2	Vegetal	75% epiboly	Yes, before escape
	DFC escaped (N)	Number of embryos	% of embryos
	0	10	45.4545
	1	4	18.1818
	2	5	22.7273
	3	1	4.54545
	4	0	0
	5	2	9.09091
	Total	22	100

## Sheet: Fig5C
	Developmental stage	Embryo ID	Marginal attached DFCs (N)	Sub-marginal attached DFCs (N)	Total attached DFC (N)		Developmental stage	Embryo ID	Total DFC number (N)			Developmental stage	Relative Attached DFCs (%)	Relative Detached DFCs (%)
	50% epiboly	1	18	7	25		50% epiboly	64	25			50% epiboly	89.9281	10.0719
	50% epiboly	2	19	13	32		50% epiboly	65	32			50% epiboly	115.108	-15.1079
	50% epiboly	3	16	14	30		50% epiboly	66	30			50% epiboly	107.914	-7.91367
	50% epiboly	4	16	7	23		50% epiboly	67	23			50% epiboly	82.7338	17.2662
	50% epiboly	5	21	8	29		50% epiboly	68	29			50% epiboly	104.317	-4.31655
	shield	6	15	4	19		shield	69	28			shield		100
	shield	7	12	5	17		shield	70	26			shield	61.5132	38.4868
	shield	8	13	6	19		shield	71	32			shield	68.75	31.25
	shield	9	11	2	13		shield	72	20			shield	47.0395	52.9605
	shield	10	14	5	19		shield	73	30			shield	68.75	31.25
	shield	11	14	4	18		shield	74	23			shield	65.1316	34.8684
	shield	12	13	4	17		shield	75	25			shield	61.5132	38.4868
	shield	13	19	8	27		shield	76	31			shield	97.6974	2.30263
	shield	14	19	5	24		shield	77	31			shield	86.8421	13.1579
	shield	15	12	8	20		shield	78	28			shield	72.3684	27.6316
	60% epiboly	16	12	5	17		shield	79	30			60% epiboly	54.519	45.481
	60% epiboly	17	18	6	24		60% epiboly	80	28			60% epiboly	76.9679	23.0321
	60% epiboly	18	14	7	21		60% epiboly	81	23			60% epiboly	67.3469	32.6531
	60% epiboly	19	12	5	17		60% epiboly	82	29			60% epiboly	54.519	45.481
	60% epiboly	20	11	8	19		60% epiboly	83	30			60% epiboly	60.9329	39.0671
	60% epiboly	21	8	7	15		60% epiboly	84	36			60% epiboly	48.105	51.895
	60% epiboly	22	15	6	21		60% epiboly	85	34			60% epiboly	67.3469	32.6531
	60% epiboly	23	19	4	23		60% epiboly	86	41			60% epiboly	73.7609	26.2391
	60% epiboly	24	11	5	16		60% epiboly	87	30			60% epiboly	51.312	48.688
	60% epiboly	25	12	1	13		60% epiboly	88	23			60% epiboly	41.691	58.309
	75% epiboly	26	7	2	9		60% epiboly	89	37			75% epiboly	20.979	79.021
	75% epiboly	27	8	3	11		60% epiboly	90	32			75% epiboly	25.641	74.359
	75% epiboly	28	8	4	12		75% epiboly	91	36			75% epiboly	27.972	72.028
	75% epiboly	29	10	3	13		75% epiboly	92	31			75% epiboly	30.303	69.697
	75% epiboly	30	9	1	10		75% epiboly	93	45			75% epiboly	23.31	76.69
	75% epiboly	31	7	2	9		75% epiboly	94	52			75% epiboly	20.979	79.021
	75% epiboly	32	5	2	7		75% epiboly	95	45			75% epiboly	16.317	83.683
	75% epiboly	33	7	3	10		75% epiboly	96	40			75% epiboly	23.31	76.69
	75% epiboly	34	10	5	15		75% epiboly	97	48			75% epiboly	34.965	65.035
	75% epiboly	35	6	4	10		75% epiboly	98	45			75% epiboly	23.31	76.69
	75% epiboly	36	11	6	17		75% epiboly	99	40			75% epiboly	39.627	60.373
	75% epiboly	37	2	7	9		75% epiboly	100	47			75% epiboly	20.979	79.021
	75% epiboly	38	3	11	14		90% epiboly	101	56			75% epiboly	32.634	67.366
	75% epiboly	39	2	8	10		90% epiboly	102	40			75% epiboly	23.31	76.69
	75% epiboly	40	10	5	15		90% epiboly	103	66			75% epiboly	34.965	65.035
	75% epiboly	41	5	5	10		90% epiboly	104	61			75% epiboly	23.31	76.69
	75% epiboly	42	5	6	11		90% epiboly	105	57			75% epiboly	25.641	74.359
	75% epiboly	43	5	5	10		90% epiboly	106	72			75% epiboly	23.31	76.69
	75% epiboly	44	5	4	9		90% epiboly	107	56			75% epiboly	20.979	79.021
	90% epiboly	45	0	0	0		90% epiboly	108	69			90% epiboly	0	100
	90% epiboly	46	0	0	0							90% epiboly	0	100
	90% epiboly	47	0	0	0							90% epiboly	0	100
	90% epiboly	48	0	2	2		Descriptive Statistics	Developmental stage	N Analysis	Mean		90% epiboly	3.3543	96.6457
	90% epiboly	49	0	3	3		Total DFC number (N)	50% epiboly	5	27.8		90% epiboly	5.03145	94.9686
	90% epiboly	50	0	2	2			Shield	11	27.6364		90% epiboly	3.3543	96.6457
	90% epiboly	51	0	3	3			60% epiboly	11	31.1818		90% epiboly	5.03145	94.9686
	90% epiboly	52	0	1	1			75% epiboly	10	42.9		90% epiboly	1.67715	98.3229
	90% epiboly	53	0	2	2			90% epiboly	8	59.625		90% epiboly	3.3543	96.6457
	90% epiboly	54	0	1	1							90% epiboly	1.67715	98.3229
	90% epiboly	55	0	1	1							90% epiboly	1.67715	98.3229
	90% epiboly	56	0	1	1							90% epiboly	1.67715	98.3229
	90% epiboly	57	0	1	1							90% epiboly	1.67715	98.3229
	90% epiboly	58	0	4	4							90% epiboly	6.7086	93.2914
	90% epiboly	59	0	2	2							90% epiboly	3.3543	96.6457
	90% epiboly	60	0	7	7							90% epiboly	11.74	88.26
	90% epiboly	61	0	3	3							90% epiboly	5.03145	94.9686
	90% epiboly	62	0	2	2							90% epiboly	3.3543	96.6457
	90% epiboly	63	0	1	1							90% epiboly	1.67715	98.3229
												Descriptive Statistics	Developmental stage	N Analysis	Mean	Standard Deviation
												Relative Attached DFCs (%)	50% epiboly	5	100	13.3142
													Shield	10	69.9561	14.809
													60% epiboly	10	59.6501	11.5333
													75% epiboly	19	25.8864	6.01334
													90% epiboly	19	3.17776	2.78936
												Relative Detached DFCs (%)	50% epiboly	5	5.68434e-15	13.3142
													Shield	10	37.0395	26.1596
													60% epiboly	10	40.3499	11.5333
													75% epiboly	19	74.1136	6.01334
													90% epiboly	19	96.8222	2.78936

## Sheet: Fig5D
		Time (min)
Cell Division Events ( cumulative frequency)	Embryo 1	Embryo 2	Embryo 3
1	12	6	34
2	36	12	53
3	40	22	56
4	65	25	59
5	73	37	74
6	81	43	78
7	83	50	81
8	85	65	84
9	88	77	93
10	105	81	143
11	113	96	177
12	117	99
13	119	143
14	121	149
15	125	161
16	129	183
17	141

## Sheet: Fig5E
Attached DFCs (Nº)	Detached DFCs (Nº)	Attached DFCs (%)	Detached DFCs (%)	Time (min)
17	3	85	15	0
17	3	85	15	7.5
17	3	85	15	15
17	3	85	15	22.5
17	3	85	15	30
16	4	80	20	37.5
16	4	80	20	45
15	5	75	25	52.5
15	5	75	25	60
15	5	75	25	67.5
15	5	75	25	75
15	5	75	25	82.5
14	6	70	30	90
14	6	70	30	97.5
14	6	70	30	105
13	8	61.9048	38.0952	112.5
10	11	47.619	52.381	120
8	14	36.3636	63.6364	127.5
7	15	31.8182	68.1818	135
6	17	26.087	73.913	142.5
5	19	20.8333	79.1667	150
4	21	16	84	157.5
3	22	12	88	165
2	24	7.69231	92.3077	172.5

## Sheet: Fig5F
Time (min)	DFC 1 (mm/s)	DFC 2 (mm/s)	DFC 3 (mm/s)	DFC 4 (mm/s)	DFC 5 (mm/s)	DFC 6 (mm/s)	DFC 7 (mm/s)	DFC 8 (mm/s)	DFC 9 (mm/s)	DFC 10 (mm/s)	Mean DFCs (mm/s)	Standard deviation	Standard error
0	2.18929	2.91881	3.04048	1.94595	2.31095	2.55405	2.06762	2.31095	3.16214	1.70262	2.42029	0.487976	0.154312
7.5	2.43238	2.67571	2.31095	1.82429	2.31071	2.43238	1.33786	1.70262	1.09476	2.31095	2.04326	0.524818	0.165962
15	1.94595	2.31095	2.91881	1.21619	2.55405	1.45952	1.58095	1.82429	2.91881	1.70262	2.04321	0.603482	0.190838
22.5	1.09452	1.21619	1.21619	1.58119	1.70286	1.33786	0.729762	1.82429	1.70286	1.45952	1.38652	0.335325	0.106039
30	1.45952	1.09452	2.06762	0.729524	1.09452	2.18905	0.608095	1.82452	1.58095	2.67571	1.5324	0.666687	0.210825
37.5	1.45952	1.70286	1.70286	1.94595	1.09452	2.79738	1.45952	2.06738	0.729762	1.94595	1.69057	0.565975	0.178977
45	0.972857	1.33762	2.18905	1.45952	1.70286	3.28381	2.18905	2.55405	1.70262	2.06762	1.9459	0.663705	0.209882
52.5	1.21619	1.45952	2.55405	1.70286	2.06762	1.21619	2.06762	1.45952	1.70286	2.67548	1.81219	0.517385	0.163612
60	1.21643	1.58119	1.94595	2.18905	1.70262	2.79738	1.58119	2.18929	2.79714	1.82452	1.98248	0.519261	0.164205
67.5	1.21619	2.31071	0.729762	1.70286	0.851429	1.21619	1.82429	1.58095	1.09476	1.33786	1.3865	0.47689	0.150806
75	2.43238	1.33786	1.09452	1.58095	0.608095	0.851429	0.729762	1.33786	1.45929	1.45929	1.28914	0.522918	0.165361
82.5	0.608095	1.33786	1.21643	1.58119	0.486429	1.33786	1.33786	1.94595	1.21643	0.608095	1.16762	0.466513	0.147524
90	1.09452	0.608095	0.729524	0.85119	0.364762	1.09452	1.45952	1.21619	1.09452	0.486667	0.899952	0.349689	0.110581
97.5	2.67571	1.94595	1.33786	1.94595	1.21619	1.82429	1.33762	1.82452	1.09452	1.94595	1.71486	0.474386	0.150014
105	1.33786	1.45952	1.70286	1.45952	0.851429	1.45952	1.21643	1.82429	1.58119	1.45929	1.43519	0.267669	0.0846445
112.5	2.55405	2.18905	0.85119	2.06762	1.94595	1.94595	1.70262	1.94595	1.70262	3.28381	2.01888	0.623367	0.197126
120	1.82429	0.973095	1.70286	1.70262	1.21619	0.364762	1.45952	1.82429	1.70286	1.58119	1.43517	0.465095	0.147076
127.5	1.94595	1.94595	1.45952	2.06762	2.55405	1.82429	2.31071	1.33786	1.70262	2.43238	1.9581	0.399051	0.126191
135	2.18929	2.18929	1.82429	2.31071	2.43262	2.06762	2.67571	2.91881	2.18905	2.43238	2.32298	0.311121	0.098385
142.5	2.79738	2.79714	1.70262	3.28381	4.01333	3.28381	2.91881	2.18929	2.06762	2.55405	2.76079	0.676031	0.21378
150	2.55405	2.79738	2.67571	2.43262	2.18929	1.33786	3.04071	2.79738	2.43262	2.91905	2.51767	0.48668	0.153902
157.5	1.82429	2.91881	2.18905	2.31071	2.31095	2.79714	3.16214	2.67571	2.06738	2.79738	2.50536	0.425984	0.134708
165	1.94595	2.18929	2.31095	2.43238	3.04071	2.91905	2.67571	4.25667	2.31095	3.52714	2.76088	0.702276	0.222079
172.5	2.06738	2.06762	3.77048	2.91905	2.79738	3.5269	3.52714	2.79738	3.8919	2.18905	2.95543	0.700015	0.221364
Time (min)	EVL margin point 1 (mm/s)	EVL margin point 1 (mm/s)	EVL margin point 1 (mm/s)	EVL margin point 1 (mm/s)	EVL margin point 1 (mm/s)	Mean EVL margin point 1 (mm/s)	Standard deviation	Standard error
0	3.04071	3.04048	3.04048	2.91905	1.82429	2.773	0.532951	0.238343
7.5	1.82429	1.94595	1.94595	1.82429	1.94595	1.89729	0.0666396	0.0298021
15	1.70262	1.94595	2.06762	1.58095	1.70262	1.79995	0.199919	0.0894064
22.5	2.06762	1.70262	0.972857	1.33786	1.58119	1.53243	0.408886	0.182859
30	2.43238	2.06762	1.21619	1.21619	1.33786	1.65405	0.561306	0.251024
37.5	1.33786	1.09452	0.851429	1.21619	1.58095	1.21619	0.271895	0.121595
45	1.70286	1.21643	1.21619	0.851429	1.94595	1.38657	0.435115	0.194589
52.5	2.18905	1.94595	1.33786	1.09452	1.94595	1.70267	0.463105	0.207107
60	1.82429	1.82429	0.973095	1.33786	1.45952	1.48381	0.358667	0.160401
67.5	1.58119	2.31071	1.09452	1.09476	1.33786	1.48381	0.504346	0.22555
75	1.70262	1.58119	1.09452	0.972857	1.21619	1.31348	0.314853	0.140806
82.5	1.58119	1.45952	0.973095	0.973095	0.973095	1.192	0.302818	0.135425
90	1.33786	1.45929	1.09452	1.21619	1.09452	1.24048	0.158552	0.0709065
97.5	1.94595	1.58119	1.82429	0.972857	1.70262	1.60538	0.378825	0.169416
105	2.55405	2.18905	0.851429	0.608095	2.06762	1.65405	0.866816	0.387652
112.5	2.06762	2.18929	0.973095	1.21643	1.82429	1.65414	0.534254	0.238926
120	2.91881	2.43238	0.85119	0.972857	1.94595	1.82424	0.901999	0.403386
127.5	2.55405	2.55405	1.45952	0.972857	2.06762	1.92162	0.695509	0.311041
135	3.28381	3.52714	2.67571	1.82452	3.04048	2.87033	0.663872	0.296893
142.5	2.31095	2.79738	4.135	2.79714	2.91905	2.9919	0.680339	0.304257
150	3.04048	3.28381	4.13524	4.13524	4.135	3.74595	0.539842	0.241425
157.5	4.25667	4.135	4.865	5.1081	4.2569	4.52433	0.433467	0.193852
165	3.64881	3.8919	4.86476	3.52714	4.25667	4.03786	0.539708	0.241365
172.5	4.62167	3.77024	4.25667	3.77024	4.37857	4.15948	0.378841	0.169423
Time (min)	YSL point 1 (mm/s)	YSL point 2 (mm/s)	YSL point 3 (mm/s)	YSL point 4 (mm/s)	Mean EVL (mm/s)	Standard deviation	Standard error
0	2.06762	2.31095	2.31095	1.70286	2.0981	0.287378	0.143689
7.5	3.16214	1.94595	2.06762	1.82429	2.25	0.616156	0.308078
15	1.58119	2.55405	2.31071	1.94595	2.09798	0.425612	0.212806
22.5	1.33786	1.58095	1.82429	1.45952	1.55065	0.207669	0.103835
30	2.06762	2.55429	1.82452	1.58095	2.00685	0.415536	0.207768
37.5	1.94595	2.06738	2.31071	1.58119	1.97631	0.303952	0.151976
45	2.55405	2.31095	2.06762	2.06762	2.25006	0.23287	0.116435
52.5	1.82429	2.31071	2.18905	1.94595	2.0675	0.222002	0.111001
60	2.31071	2.06762	2.18929	1.45929	2.00673	0.378213	0.189107
67.5	1.33786	1.58119	1.82429	1.58119	1.58113	0.198584	0.0992918
75	0.851429	0.972857	1.21619	0.972857	1.00333	0.153015	0.0765075
82.5	1.33786	1.58119	1.33786	1.21643	1.36833	0.153015	0.0765075
90	1.21619	1.45929	1.09476	1.33762	1.27696	0.156856	0.0784279
97.5	2.43238	1.94595	2.18905	2.31095	2.21958	0.207716	0.103858
105	2.67571	2.91905	2.67571	2.06762	2.58452	0.363193	0.181597
112.5	2.31071	2.31071	1.94595	1.82429	2.09792	0.250688	0.125344
120	2.43262	2.31095	1.82429	1.82429	2.09804	0.319978	0.159989
127.5	3.16214	3.28381	2.67571	2.31071	2.8581	0.449654	0.224827
135	3.8919	3.77024	3.28381	3.52714	3.61827	0.269653	0.134827
142.5	2.79714	3.16214	3.52714	3.64857	3.28375	0.384669	0.192334
150	3.64881	4.62167	3.5269	3.64881	3.86155	0.509994	0.254997
157.5	4.16476	4.28643	4.1081	4.22976	4.19726	0.157071	0.0785355
165	4.865	4.25699	4.31619	4.59452	4.50818	0.409355	0.204678
172.5	4.44595	4.32976	4.565	4.78643	4.53179	0.725474	0.362737
