# Supplementary material for: Apical contacts stemming from incomplete delamination guide progenitor cell allocation through a dragging mechanism
Source: eLife. 2021 Aug 27;10:e66483. doi: 10.7554/eLife.66483 (PMC8460252; doi:10.7554/eLife.66483)
Supplement: Figure 7—source data 1. [file elife-66483-fig7-data1.xlsx]

## Sheet: Fig6B
Number of neighbor cells (Nº)											cell-cell distance (mm)											Shared surface (%)
cell ID	7,0 (hpf)	cell ID	7,5 (hpf)	cell ID	8,0 (hpf)	cell ID	8,5 (hpf)	cell ID	9,0 (hpf)		cell ID	7,0 (hpf)	cell ID	7,5 (hpf)	cell ID	8,0 (hpf)	cell ID	8,5 (hpf)	cell ID	9,0 (hpf)		cell ID	7,0 (hpf)	cell ID	7,5 (hpf)	cell ID	8,0 (hpf)	cell ID	8,5 (hpf)	cell ID	9,0 (hpf)
1	2	1	2	1	4	1	9	1	7		1	79.1783	1	65.201	1	51.1674	1	17.4483	1	28.5014		1	16.0406	1	31.1969	1	44.716	1	91.5754	1	86.5794
2	4	2	4	2	4	2	9	2	9		2	64.5932	2	56.6947	2	52.2706	2	22.1298	2	37.6931		2	37.8254	2	44.9543	2	39.7008	2	85.8726	2	82.2929
3	2	3	3	3	4	3	10	3	7		3	69.761	3	54.1482	3	52.1423	3	12.2742	3	43.2956		3	16.708	3	24.8379	3	21.4416	3	100	3	89.0804
4	4	4	4	4	6	4	11	4	6		4	65.7489	4	55.6404	4	45.9329	4	12.8816	4	26.594		4	28.2575	4	23.1653	4	33.8564	4	99.1191	4	94.0783
5	4	5	5	5	7	5	15	5	9		5	50.3242	5	43.0993	5	31.5144	5	17.3547	5	25.2766		5	35.2738	5	64.4323	5	74.3275	5	100	5	100
6	7	6	8	6	8	6	6	6	10		6	48.7148	6	39.4922	6	38.0759	6	37.1021	6	27.823		6	51.5912	6	57.6433	6	58.2056	6	85.3439	6	94.3063
7	2	7	4	7	6	7	14	7	7		7	48.9745	7	36.1775	7	37.7745	7	25.0614	7	40.3969		7	12.8607	7	35.0946	7	51.3752	7	100	7	90.9974
8	4	8	5	8	8	8	8	8	16		8	39.7554	8	36.7847	8	34.095	8	15.1307	8	21.6597		8	53.3395	8	58.6942	8	61.2428	8	100	8	99.7538
9	8	9	10	9	12	9	16	9	8		9	27.0672	9	23.945	9	18.8049	9	17.5676	9	14.5714		9	64.5314	9	70.8449	9	69.4664	9	93.6321	9	92.3116
10	10	10	11	10	12	10	10	10	8		10	35.167	10	30.3847	10	28.4603	10	26.8871	10	30.7249		10	60.4881	10	72.9481	10	58.7368	10	93.4708	10	99.9264
11	8	11	8	11	10	11	15	11	15		11	20.1652	11	19.2327	11	20.2972	11	18.7674	11	19.1525		11	72.6409	11	80.2244	11	85.7726	11	89.4529	11	100
12	5	12	6	12	5	12	10	12	12		12	31.1604	12	39.5629	12	29.2267	12	31.8729	12	20.5499		12	43.6996	12	52.4724	12	67.204	12	98.623	12	100
13	9	13	11	13	10	13	4	13	9		13	20.2713	13	20.7892	13	11.7174	13	47.2175	13	11.264		13	87.3643	13	87.1757	13	97.8714	13	80.929	13	100
14	3	14	4	14	6	14	9	14	7		14	44.4553	14	40.2638	14	28.7869	14	40.5321	14	28.0023		14	28.7461	14	25.784	14	54.2189	14	95.66	14	99.1785
15	3	15	3	15	4	15	13	15	8		15	48.0622	15	42.8204	15	36.6203	15	28.0213	15	28.9644		15	27.6976	15	33.4616	15	42.4947	15	99.2374	15	91.3652
16	6	16	5	16	4	16	10	16	6		16	31.4521	16	30.462	16	22.7168	16	27.9248	16	22.3612		16	55.4719	16	62.2603	16	67.7061	16	91.066	16	97.2259
17	8	17	8	17	9	17	8	17	9		17	35.542	17	32.5801	17	26.143	17	20.3347	17	22.0138		17	68.1169	17	68.8533	17	61.2429	17	100	17	86.4022
18	7	18	9	18	8	18	11	18	10		18	27.3479	18	35.4188	18	22.3276	18	20.3758	18	18.7116		18	51.1839	18	47.7421	18	79.1677	18	99.6502	18	99.9291
19	7	19	8	19	7	19	15	19	12		19	12.9925	19	11.7926	19	12.355	19	13.688	19	12.3811		19	63.3379	19	64.7457	19	63.5365	19	98.2711	19	100
20	6	20	9	20	11	20	15	20	11		20	38.4036	20	35.5483	20	35.4764	20	13.4556	20	27.7082		20	61.6855	20	53.6206	20	65.6654	20	100	20	92.1365
21	9	21	5	21	5	21	7	21	9		21	44.6157	21	46.8126	21	53.421	21	29.3533	21	38.626		21	42.2112	21	57.4492	21	49.4946	21	85.3902	21	81.5676
22	12	22	10	22	12	22	12	22	8		22	13.2149	22	13.9756	22	9.07218	22	29.0554	22	11.7566		22	90.4551	22	96.9422	22	98.0027	22	100	22	100
23	7	23	6	23	8	23	10	23	11		23	13.6843	23	17.932	23	13.832	23	32.8196	23	14.8194		23	90.7055	23	81.9192	23	95.1104	23	99.8947	23	99.6802
24	10	24	11	24	12	24	8	24	11		24	18.866	24	20.8534	24	13.3736	24	25.4569	24	15.5221		24	80.3702	24	76.962	24	96.3165	24	100	24	96.6723
25	10	25	9	25	11	25	12	25	17		25	25.247	25	21.7264	25	24.9142	25	9.8138	25	23.1073		25	81.0347	25	84.2287	25	88.9954	25	100	25	100
26	5	26	7	26	7	26	6	26	5		26	29.139	26	20.2596	26	21.0653	26	23.8836	26	22.6089		26	51.1119	26	59.9113	26	60.952	26	83.4019	26	80.4547
27	10	27	11	27	14	27	10	27	11		27	11.3727	27	11.9136	27	13.5644	27	17.3316	27	14.1399		27	71.7569	27	82.2046	27	84.6677	27	100	27	100
28	9	28	10	28	8	28	9	28	9		28	24.4624	28	29.1273	28	27.7069	28	24.3518	28	25.3897		28	79.8487	28	80.5916	28	74.6936	28	96.4818	28	98.9671
29	9	29	11	29	7	29	8	29	4		29	13.9842	29	14.1296	29	15.8319	29	18.8123	29	20.6426		29	64.2985	29	65.1938	29	60.7222	29	100	29	100
30	7	30	7	30	12	30	7	30	5		30	17.0864	30	26.1558	30	24.5982	30	24.1498	30	31.835		30	65.8756	30	75.1734	30	99.5754	30	91.8382	30	96.4797
31	8	31	4	31	9	31	10	31	12		31	30.3975	31	39.0515	31	42.9448	31	18.8548	31	19.5146		31	85.7576	31	61.4481	31	72.3569	31	100	31	99.7943
32	4	32	8	32	9	32	5	32	8		32	29.7954	32	27.1827	32	32.045	32	26.9265	32	20.8835		32	41.8112	32	56.9719	32	68.655	32	88.9394	32	97.2055
33	7	33	5	33	5	33	3	33	5		33	24.2105	33	27.25	33	54.7343	33	35.6937	33	15.0892		33	48	33	71.581	33	72.1467	33	96.8938	33	100
34	13	34	9	34	10	34	8	34	10		34	17.9479	34	24.9069	34	26.5436	34	28.6307	34	21.0399		34	85.8999	34	97.9683	34	78.3441	34	80.9638	34	93.5698
35	5	35	9	35	8	35	6	35	8		35	27.1351	35	17.3126	35	28.2345	35	31.4942	35	35.2807		35	50.9783	35	65.2123	35	67.5645	35	65.3448	35	93.3223
36	6	36	12	36	8	36	8	36	5		36	33.2935	36	17.697	36	40.0408	36	45.0532	36	21.4554		36	42.7213	36	88.2183	36	76.6525	36	100	36	100
37	3	37	8	37	10	37	4	37	9		37	50.3674	37	31.9809	37	23.6452	37	54.0388	37	26.5261		37	28.5827	37	68.8678	37	56.6891	37	77.5805	37	82.3065
38	3	38	10	38	5	38	5	38	9		38	44.6229	38	37.9906	38	34.0875	38	16.4129	38	15.1011		38	24.8561	38	76.9714	38	40.5027	38	100	38	98.8806
39	8	39	4	39	5	39	6	39	5		39	32.7394	39	45.6965	39	45.0646	39	22.7716	39	22.0469		39	67.8051	39	41.3488	39	38.3297	39	100	39	100
40	5	40	10	40	7	40	6	40	9		40	46.0864	40	28.8634	40	34.63	40	20.8572	40	20.863		40	77.5987	40	55.9622	40	74.5119	40	98.8602	40	100
41	5	41	7	41	9	41	5	41	7		41	55.0546	41	38.4178	41	22.6531	41	24.3404	41	30.8036		41	45.3404	41	77.4987	41	86.8703	41	98.4195	41	93.8863
42	2	42	6	42	5	42	9	42	6		42	73.108	42	42.0101	42	28.4837	42	22.3691	42	35.9765		42	14.2064	42	31.831	42	54.1153	42	99.9274	42	99.883
43	11	43	6	43	4	43	6	43	3		43	34.5457	43	54.7068	43	35.2251	43	33.5478	43	40.2885		43	82.3229	43	57.8871	43	33.301	43	92.5172	43	93.3519
44	4	44	7	44	7	44	5	44	6		44	42.7723	44	50.4658	44	39.9154	44	48.0916	44	34.916		44	28.017	44	41.1314	44	67.8843	44	85.8131	44	68.4497
		45	2	45	4	45	2	45	4				45	70.7284	45	49.9354	45	49.6317	45	21.6517				45	20.3562	45	49.0658	45	89.6399	45	100
		46	5	46	6	46	7	46	8				46	39.5431	46	37.8669	46	38.4729	46	27.2509				46	46.2096	46	65.4022	46	89.355	46	100
				47	4	47	8	47	9						47	48.1818	47	13.7876	47	16.309						47	54.2707	47	100	47	89.8815
						48	11	48	5								48	13.4311	48	33.9652								48	99.0048	48	66.7369
						49	5	49	5								49	43.404	49	41.977								49	49.9726	49	95.5744
						50	7	50	5								50	29.5563	50	35.4538								50	99.9965	50	96.3419
						51	7	51	4								51	34.9673	51	45.7987								51	100	51	97.3381
						52	11	52	3								52	28.9187	52	43.8154								52	97.7699	52	100
						53	7	53	7								53	30.8303	53	38.5122								53	100	53	97.7808
						54	8	54	10								54	45.5884	54	23.4603								54	100	54	96.3594
						55	12	55	10								55	36.0835	55	21.4781								55	99.4507	55	100
						56	5	56	8								56	50.8184	56	19.1603								56	96.1523	56	96.9072
						57	4	57	4								57	37.4436	57	41.749								57	100	57	80.7382
						58	5	58	14								58	53.3208	58	20.4091								58	57.4674	58	100
						59	4	59	10								59	47.7078	59	18.9224								59	100	59	81.9858
								60	17										60	8.87291										60	100
Descriptive statistics											Descriptive statistics											Descriptive statistics
N total	Mean	Standard Deviation	SE of mean	Minimum	Median	Maximum					N total	Mean	Standard Deviation	SE of mean	Minimum	Median	Maximum					N total	Mean	Standard Deviation	SE of mean	Minimum	Median	Maximum
44	6.38636	2.88715	0.43525	2	6.5	13					44	36.202	17.1422	2.58428	11.3727	33.0164	79.1783					44	54.0551	22.8322	3.44208	12.8607	52.4654	90.7055
46	7.08696	2.74733	0.40507	2	7	12					46	34.0593	14.1809	2.09086	11.7926	33.9995	70.7284					46	60.439	20.1179	2.96623	20.3562	61.8542	97.9683
47	7.57447	2.75637	0.40206	4	7	14					47	31.4365	12.4395	1.81448	9.07218	29.2267	54.7343					47	65.1732	18.6888	2.72604	21.4416	65.6654	99.5754
59	8.40678	3.33797	0.43457	2	8	16					59	28.5441	11.7238	1.5263	9.8138	26.9265	54.0388					59	93.6098	10.4384	1.35897	49.9726	98.8602	100
60	8.35	3.26681	0.42174	3	8	17					60	25.7444	9.37919	1.21085	8.87291	22.8581	45.7987					60	94.4947	7.74094	0.99935	66.7369	97.282	100

## Sheet: Fig6H
Control Embryo ID	DFCs escaped (Nº)			e-cad MO Embryo ID	DFCs escaped (Nº)
1	0			1	6
2	0			2	11
3	0			3	8
4	0			4	6
5	0			5	7
6	1
7	1
8	2
9	5
				Descriptive Statistics		N Analysis	Mean	Standard Deviation
					Control embryos	9	1	1.65831
					e-cad MO embryos	5	7.6	2.07364
				Normality Test (Shapiro Wilk)		p-value	Decision at level(5%)
					Control embryos	0.000976835	Reject normality
					e-cad MO embryos	0.17096	Can't reject normality
				Kolmogorov-Smirnov test	D	Z	Exact Prob>|D|
					1	1.79284	0.000999001
