# Supplementary material for: Apical contacts stemming from incomplete delamination guide progenitor cell allocation through a dragging mechanism
Source: eLife. 2021 Aug 27;10:e66483. doi: 10.7554/eLife.66483 (PMC8460252; doi:10.7554/eLife.66483)
Supplement: Figure 8—source data 1. [file elife-66483-fig8-data1.xlsx]

## Sheet: Fig6C-D
Clustre number						Width of gaps beetween DFC clusters (mm)
Developmental stage	Single cluster (Nº embryos)	Two cluster (Nº embryos)	Three cluster (Nº embryos)			width D	width (mm)
Shield	63	31	16			1	33.6		N total	Mean	Standard Deviation	Sum	Minimum	Median	Maximum
80% epiboly	83	4	1			2	67.76		21	52.2688	24.3251	1097.64	21.4648	43.6968	102.021
						3	102.021
	=					3	38.0856
						4	33.4712
						5	76.2328
						5	43.6968
						6	63.2912
						7	27.5128
						7	91.0728
						8	35.4592
						9	30.6376
						10	21.4648
						11	78.9936
						12	64.1088
						13	82.3872
						14	52.024
						15	68.32
						16	30.9792
						16	29.6184
						16	26.908

## Sheet: Fig6G
Long Protrusions				Other protrusions beetwee DFC clusters				Lateral protrusions
Embryo	Protrusion (ID)	Protrusion lenght (mm)		Embryo	Protrusion (ID)	Protrusion lenght (mm)		Embryo	Protrusion (ID)	Protrusion lenght (mm)		Normality Test	DF	Statistic	p-value	Decision at level(5%)
1	1	35.73		1	1	23.81		1	1	19.07		Long prot,	8	0.95248	0.73618	Can't reject normality
1	2	32.76		1	2	14.02		1	2	12.3		Other prot. Between	15	0.83136	0.00956	Can't reject normality
2	1	27.06		1	3	16		1	3	14.94		Lateral protrusions	14	0.91246	0.17109	Can't reject normality
2	2	25.61		1	4	17.25		2	1	27.22
3	1	28.17		1	5	11.91		2	2	12.05
3	2	35.78		1	6	24.07		2	3	16.97		Statistical test	Long prot,	Other prot. Between	Other prot. Between
3	3	22.19		1	7	22.96		2	4	14.77		Long prot,		Kolmogorov-Smirnov	Two sample t-Test
3	4	21.05		2	1	28.53		3	1	13.78		Other prot. Between			Kolmogorov-Smirnov
				2	2	32.82		3	2	10.32		Lateral protrusions
				2	3	12.42		3	3	17.67
				2	4	16.05		3	4	12.96
				3	1	7.31		3	5	11.23		p-value	Long prot,	Other prot. Between	Other prot. Between
				3	2	5.05		3	6	8.71		Long prot,		0.000626064	5.13912e-05
				3	3	3.86		3	7	7.53		Other prot. Between			0.43093
				3	4	8.91						Lateral protrusions

## Sheet: Fig6H
Long Protrusions				Other protrusions beetwee DFC clusters				Lateral protrusions
Embryo	Protrusion (ID)	Protrusion lenght (mm)		Embryo	Protrusion (ID)	Protrusion lenght (mm)		Embryo	Protrusion (ID)	Protrusion lenght (mm)		Normality Test	DF	Statistic	p-value	Decision at level(5%)
1	1	16.5		1	1	11		1	1	11		Long prot,	8	0.95248	0.73618	Can't reject normality
1	2	11		1	2	5.5		1	2	11		Other prot. Between	15	0.83136	0.00956	Reject normality
2	1	12		1	3	5.5		1	3	5.5		Lateral protrusions	14	0.91246	0.17109	Can't reject normality
2	2	12		1	4	5.5		2	1	6
3	1	10		1	5	5.5		2	2	3
3	2	6.66667		1	6	5.5		2	3	3		Statistical test	Long prot,	Other prot. Between	Other prot. Between
3	3	4		1	7	5.5		2	4	6		Long prot,		Kolmogorov-Smirnov	Two sample t-Test
3	4	5.33333		2	1	6		3	1	4.66667		Other prot. Between			Kolmogorov-Smirnov
				2	2	12		3	2	4		Lateral protrusions
				2	3	6		3	3	8.66667
				2	4	6		3	4	6
				3	1	2		3	5	3.33333		p-value	Long prot,	Other prot. Between	Other prot. Between
				3	2	2		3	6	1.33333		Long prot,		0.02048	0.0111
				3	3	1.33333		3	7	1.33333		Other prot. Between			0.73301
				3	4	2						Lateral protrusions

## Sheet: Fig6I
Long Protrusions				Other protrusions beetween DFC clusters
Embryo	Protrusion (ID)	Protrusion lenght (mm)		Embryo	Protrusion (ID)	Protrusion lenght (mm)		Normality Test	DF	Statistic	p-value	Decision at level(5%)
1	1	21.77		1	1	73.71		Long prot,	8	0.95248	0.73618	Can't reject normality
1	2	27.39		1	2	45.55		Other prot. Between	15	0.83136	0.00956	Reject normality
2	1	1.37		1	3	34.41		Other prot. Between	14	0.91246	0.17109	Can't reject normality
2	2	5.52		1	4	26.6
3	1	3.07		1	5	3.13
3	2	32.66		1	6	50.85		p-value	Other prot. Between
3	3	24.63		1	7	50.02		Long prot,	0.01038
3	4	6.84		2	1	13.8
				2	2	11.3
				2	3	13.95
				2	4	11.33
				3	1	45.09
				3	2	42.63
				3	3	43.85
				3	4	56.38
